# Supplementary material for: BRCA2 BRC missense variants disrupt RAD51-dependent DNA repair
Source: eLife journal article supplement (doi:10.7554/elife.79183), 2022-09-13
Supplement: fig3-data1 [file Figure3C-source data1-quantification HDR.xlsx]

## Sheet: Data
Figure 3C-Source Data 1
Graphics represented in GraphPad Prism 9.3.1 as column individual values scatter dot plot with mean
	BRCA2-/-	BRCA2 WT	S1221P	T1346I	T1980I
Exp 1 10/1/2021	0	0.275735	0.085763	0.654206	0.464567
	0.265252	0.464191	0.165563	0.365408	0.093567
	0	0.570704	0.636436	0.337838	0.400504
				0.585223
Exp 2 10/11/2021	0	0.6639	0.042373	0.58651	0
	0	0.2443	0	1.22511	1.04167
	0.081367	0.219138	0.108225	0.266667	1.04167
Exp 3 10/18/2021	0	0.704225	0	1.36986	0
	0	1.82927	0	2.12766	0
	0		0	2.5641	0.653595
		1.79641
Exp 4 10/25/2021	0	0.512821	0	2.30548	0.189753
	0	2	0	1.88679	0
	0	0.724638	0.52356	1.766
	0	2.43902			0.26178
	Raw data	Quantify with Cell Profiler Counting and Scoring pipeline 0.25 threshold
Experiment 1	2021-10-01					Experiment 2	2021-10-11			Experiment 3	2021-10-18				Experiment 4	2021-10-25
		Total Nuclei	mClover positive cells	Percentage			Total Nuclei	mClover positive cells	Percentage			Total Nuclei	mClover positive cells	Percentage			Total Nuclei	mClover positive cells	Percentage
	BRCA2 WT	1088	3	0.275735		BRCA2-/-	891	0	0		BRCA2 WT	284	2	0.704225		BRCA2-/-	99	0	0
		1508	7	0.464191			1315	0	0			164	3	1.82927			91	0	0
		1577	9	0.570704			1229	1	0.081367			147	6	4.08163			57	0	0
	BRCA2-/-	492	0	0		S1221P	2360	1	0.0423729			167	3	1.79641			99	0	0
		377	1	0.265252			2006	0	0		BRCA2-/-	262	0	0		S1221P	272	0	0
		494	0	0			1848	2	0.108225			267	0	0			212	0	0
	S1221P	1166	1	0.0857633		T1346I	682	4	0.58651			220	0	0			191	1	0.52356
		1208	2	0.165563			1959	29	1.48035		S1221P	153	0	0		T1346I	347	8	2.30548
		1257	8	0.636436			1875	8	0.426667			146	0	0			318	6	1.88679
	T1346I	1070	7	0.654206		T1980I	293	0	0			135	0	0			453	8	1.766
		821	3	0.365408			192	2	1.04167		T1346I	292	4	1.36986		T1980I	527	1	0.189753
		888	3	0.337838			192	3	1.5625			235	5	2.12766			466	0	0
		1367	8	0.585223		BRCA2 WT	1205	8	0.6639			234	6	2.5641			371	11	2.96496
	T1980I	635	22	3.46457			1228	3	0.2443		T1980I	148	0	0			382	1	0.26178
		684	28	4.09357			1369	4	0.292184			170	0	0		BRCA2 WT	195	1	0.512821
		794	27	3.4005								153	1	0.653595			200	4	2
																	276	2	0.724638
	Outliers not included in the graph																246	6	2.43902

## Sheet: Statistics
Statistics
Table Analyzed	BRC paper		Table Analyzed	BRC paper		Table Analyzed	BRC paper		Table Analyzed	BRC paper
Column B	BRCA2 WT		Column C	S1221P		Column D	T1346I		Column E	T1980I
vs.	vs.		vs.	vs.		vs.	vs.		vs.	vs.
Column A	DLD1-/-		Column B	BRCA2 WT		Column B	BRCA2 WT		Column B	BRCA2 WT
Unpaired t test			Unpaired t test			Unpaired t test			Unpaired t test
P value	0.0002		P value	0.0015		P value	0.3838		P value	0.0208
P value summary	***		P value summary	**		P value summary	ns		P value summary	*
Significantly different (P < 0.05)?	Yes		Significantly different (P < 0.05)?	Yes		Significantly different (P < 0.05)?	No		Significantly different (P < 0.05)?	Yes
One- or two-tailed P value?	Two-tailed		One- or two-tailed P value?	Two-tailed		One- or two-tailed P value?	Two-tailed		One- or two-tailed P value?	Two-tailed
t, df	t=4.354, df=24		t, df	t=3.598, df=23		t, df	t=0.8871, df=24		t, df	t=2.482, df=23
