# Supplementary material for: BRCA2 BRC missense variants disrupt RAD51-dependent DNA repair
Source: eLife journal article supplement (doi:10.7554/elife.79183), 2022-09-13
Supplement: fig3-data1 [file Figure3F-source data1-analysis DNA tracks.xlsx]

## Sheet: Normalization
Figure 3C-Source Data 1
Graphics represented in GraphPad Prism 9.3.1 as column individual values ploting mean with SD
WT	Avg	Norm		BRCA2 -/-	Norm	Avg		S12	Norm	Avg		T13	Norm	Avg		T19	Norm	Avg
0.914634	1.38184	0.661898		0.783951	0.567325	0.765545		0.75	0.542756	0.762921		1.31707	0.953133	0.976928		1.50568	1.08962	0.890695
1.26667		0.916655		0.663636	0.480257			0.610169	0.441564			0.852273	0.616768			1.16564	0.843547
2.29	1	1.65722		2.21739	1.60467			0.6	0.434205			2.05455	1.48682			1.09375	0.791519
0.927273		0.671044		0.868263	0.628341			1.25	0.904594			2.13115	1.54226			1.34375	0.972438
0.843931		0.610731		1.66346	1.20381			1.71429	1.24059			1.70455	1.23354			1.07639	0.778956
1.33333		0.9649		0.798561	0.577899			0.835294	0.604481			0.637584	0.461403			1.51176	1.09403
1.28571		0.930439		1.11546	0.80723			0.755556	0.546777			1.2963	0.938097			1.06944	0.77393
0.707692		0.512139		0.954167	0.690506			0.733333	0.530695			1.42857	1.03382			1.74242	1.26095
0.785714		0.568602		1.53846	1.11335			1.57143	1.1372			1.03659	0.750151			1.06195	0.768504
0.931034		0.673766		1.98507	1.43655			1.17647	0.851382			0.7	0.506572			0.732919	0.530395
1.16842		0.845557		0.972727	0.703938			1.22	0.882883			0.81	0.586177			1.34483	0.973218
0.810811		0.586763		1.22642	0.887526			1.09804	0.794623			1.33333	0.9649			1.44186	1.04344
0.927273		0.671044		0.225352	0.163082			1.27778	0.924696			1.15789	0.837939			1.2	0.86841
1.44		1.04209		1.08534	0.78543			1.2	0.86841			1.1	0.796042			2.41667	1.74888
1.10326		0.798402		0.466667	0.337715			0.804878	0.58247			0.78	0.564466			0.963855	0.697518
2.1		1.51972		1.4	1.01314			0.965263	0.698537			1.14865	0.831248			1.15385	0.83501
0.717791		0.519448		0.740741	0.536055			0.441558	0.319545			0.857843	0.6208			1.48276	1.07304
0.934783		0.676479		0.852713	0.617087			1.13889	0.824185			1.0625	0.768905			0.879518	0.636485
1.35135		0.977939		1.42727	1.03288			0.643956	0.466015			1.47619	1.06828			2.5	1.80919
0.904255		0.654387		1.33393	0.965331			3.64167	2.63538			1.13636	0.822358			1.50909	1.09209
1.73913		1.25857		0.840491	0.608242			0.833333	0.603062			1.19608	0.865572			1.23571	0.894255
1.33333		0.9649		0.655738	0.474541			0.917073	0.663663			1.47826	1.06978			1.796	1.29972
1.17188		0.848057		0.6	0.434205			1.35714	0.98213			1.55039	1.12198			0.775904	0.561502
1.45695		1.05436		1.03571	0.74952			1.10417	0.799058			1.44444	1.04531			1.07143	0.775366
0.521484		0.377385		1.20302	0.870595			1.75676	1.27132			1.23636	0.894725			1.32308	0.957478
1.50685		1.09047		0.622222	0.450287			0.591304	0.427912			1.11927	0.809985			1.83784	1.33
1.53333		1.10963		1.11742	0.808652			1.22727	0.888146			2.30769	1.67002			0.818182	0.592098
1.74528		1.26302		0.935484	0.676986			1.01504	0.734557			1.07541	0.778247			1.28788	0.932006
1.70149		1.23133		1.34463	0.973077			2.02273	1.4638			1.3	0.940777			0.986486	0.713896
1.17949		0.853565		0.783333	0.566879			1.5	1.08551			0.833333	0.603062			0.423077	0.30617
0.716495		0.518509		0.704148	0.509575			1.27273	0.921041			1.74118	1.26005			1.25862	0.910832
2.65169		1.91896		1.02985	0.745277			0.793103	0.573949			1.02985	0.745277			1.26667	0.916655
1.22857		0.889086		1.02041	0.738444			1.90196	1.3764			1.39535	1.00978			1.5	1.08551
1.27778		0.924696		0.746667	0.540344			0.8	0.57894			1.21795	0.881399			1.66667	1.20612
1.5101		1.09282		0.448276	0.324406			0.942969	0.682403			1.325	0.958869			1.60753	1.16333
1.31733		0.953321		0.885714	0.640969			1.11579	0.807469			1.78667	1.29297			1.29	0.933541
1.40164		1.01433		1.23529	0.893951			0.933333	0.67543			1.30667	0.945602			1.14737	0.830322
0.839161		0.60728		0.920635	0.66624			0.8	0.57894			0.454545	0.328943			0.707547	0.512034
2.1		1.51972		1.38182	0.999987			1.95	1.41117			0.373626	0.270384			1.72727	1.24998
2.22727		1.61182		0.836066	0.60504			0.675676	0.48897			0.326923	0.236586			1.58197	1.14483
1		0.723675		1.20482	0.871897			0.723404	0.52351			1.45714	1.0545			1.91176	1.3835
1.60294		1.16001		0.767123	0.555148			0.9	0.651307			1	0.723675			1.6	1.15788
1.55556		1.12572		1.1875	0.859364			1.11667	0.808104			1.16216	0.841028			1.11667	0.808104
0.919355		0.665314		0.865248	0.626158			0.530303	0.383767			1.70213	1.23179			0.442105	0.31994
1.6125		1.16693		0.596659	0.431787			0.927273	0.671044			1.75	1.26643			0.84127	0.608806
0.840336		0.60813		2.17143	1.57141			1.62	1.17235			0.896552	0.648812			1.75248	1.26822
1.71613		1.24192		1.72281	1.24675			1.425	1.03124			1.5	1.08551			0.283688	0.205298
1.2		0.86841		1.14556	0.829016			1.28495	0.929883			0.978261	0.707943			0.680952	0.492788
1.5		1.08551		0.600858	0.434826			0.863636	0.624992			1.27027	0.919263			1.96809	1.42425
1.24444		0.900573		0.969139	0.701342			1.13725	0.823003			1.19342	0.863645			1.11607	0.807673
1.575		1.13979		0.8	0.57894			1.30435	0.943924			2.33784	1.69183			0.390476	0.282578
1.07447		0.777566		0.533333	0.38596			0.519774	0.376147			1.52273	1.10196			1.54545	1.11841
0.671642		0.48605		0.766667	0.554817			0.40625	0.293993			0.689655	0.499086			0.969697	0.701745
1.06349		0.769623		1.32051	0.955622			0.635294	0.459746			1.17073	0.847229			1.25	0.904594
0.949367		0.687033		0.785714	0.568602			0.756303	0.547317			1.33333	0.9649			1.08242	0.783318
0.93		0.673018		1.40431	1.01626			0.823529	0.595968			1.77619	1.28538			0.966667	0.699552
0.979381		0.708754		1.61194	1.16652			1.42857	1.03382			1.38318	1.00097			0.821429	0.594447
0.992063		0.717931		0.97541	0.70588			0.436364	0.315785			1.19643	0.865825			1.4	1.01314
1.08621		0.786061		1.06838	0.773157			2.72727	1.97366			1.67702	1.21362			2.83203	2.04947
2.28261		1.65187		0.621622	0.449852			1.11278	0.805292			2.13043	1.54174			1.22764	0.888414
1.21591		0.879923		0.857143	0.620293			1.1875	0.859364			1.7093	1.23698			1.57977	1.14324
1.98		1.43288		1.11268	0.805216			0.6	0.434205			1.12963	0.817485			2.01471	1.45799
1.85965		1.34578		1.21094	0.876325			1.71429	1.24059			1.6	1.15788			0.810811	0.586763
1.78571		1.29228		0.380841	0.275605			0.737864	0.533974			1.41463	1.02374			1.16721	0.844683
0.895161		0.647806		0.772472	0.559019			1.15625	0.836749			1.4535	1.05186			0.961111	0.695532
1.325		0.958869		1.93478	1.40015			0.462963	0.335035			1.88462	1.36385			1.35714	0.98213
1.05556		0.763879		1.38235	1.00037			0.814815	0.589661			1.6	1.15788			0.974359	0.705119
0.651515		0.471485		0.883117	0.63909			1.0566	0.764638			1.26	0.91183			1.64103	1.18757
0.909091		0.657886		0.836842	0.605602			0.366667	0.265347			2.1	1.51972			0.782609	0.566354
1.48936		1.07781		0.970149	0.702073			0.732143	0.529833			0.461538	0.334004			1.28283	0.928351
1.06897		0.773584		0.63253	0.457746			1.30556	0.944798			0.769231	0.556673			1.12397	0.813387
0.616667		0.446266		1.91719	1.38742			1.2549	0.908141			2.74074	1.98341			0.944444	0.683471
1.26984		0.918952		0.821053	0.594175			1	0.723675			1.61429	1.16822			1.2	0.86841
1.27059		0.919493		1.08974	0.78862			1.01961	0.737865			0.778947	0.563705			0.923077	0.668008
1.40506		1.01681		0.75167	0.543965			0.822368	0.595127			1.00426	0.726754			1.6	1.15788
1.31915		0.954635		0.795455	0.575651			1.13333	0.820165			1.92	1.38946			2.07018	1.49813
1.18519		0.857689		1.46875	1.0629			0.550562	0.398428			1.05625	0.764382			0.933962	0.675885
1.88235		1.36221		0.858333	0.621154			0.840909	0.608545			1.78125	1.28905			1.16667	0.844287
2.44444		1.76898		0.666667	0.48245			2.66667	1.9298			1.94286	1.406			1.33607	0.966877
1.28571		0.930439		0.886364	0.641439			0.810811	0.586763			1.75676	1.27132			1.05556	0.763879
0.941176		0.681106		2.75	1.99011			1.44262	1.04399			1.13208	0.819255			0.963855	0.697518
1.03175		0.746649		0.758929	0.549218			1.0274	0.743502			2.5	1.80919			1.50704	1.09061
1.025		0.741767		0.515464	0.373028			0.871429	0.630631			1.52	1.09999			0.95283	0.689539
0.615385		0.445338		1.50769	1.09108			0.952381	0.689214			0.722222	0.522654			1.20611	0.872829
1.40909		1.01972		1.31148	0.949082			0.481818	0.34868			1.39815	1.0118			1.04615	0.757075
1.176		0.851042		0.649819	0.470258			0.740741	0.536055			2.10526	1.52353			1.50588	1.08977
1.66667		1.20612		3	2.17102			2.3	1.66445			0.878378	0.63566			1.47059	1.06423
2.58974		1.87413		0.80597	0.58326			1.27273	0.921041			1.42424	1.03069			1.53846	1.11335
2.10084		1.52033		1.43232	1.03653			0.686747	0.496982			0.907407	0.656668			0.960452	0.695055
0.784		0.567361		0.928571	0.671984			0.872093	0.631112			1.89655	1.37249			0.866667	0.627185
1.73		1.25196		0.48	0.347364			0.952381	0.689214			1.5	1.08551			0.662651	0.479544
1.79121		1.29625		0.62069	0.449178			0.733333	0.530695			1.46875	1.0629			1.08197	0.782993
1.41667		1.02521		0.985294	0.713033			0.555556	0.402042			0.9	0.651307			0.9	0.651307
2.35294		1.70276		1.2243	0.885995			0.969697	0.701745			1.14	0.824989			0.704545	0.509862
1.77737		1.28624		0.673387	0.487313			1.28767	0.931855			1.06383	0.769867			1.48053	1.07142
1.4		1.01314		0.747664	0.541065			0.926316	0.670352			1.44444	1.04531			1.06589	0.771359
1.40367		1.0158		0.804598	0.582267			0.603774	0.436936			1.59091	1.1513			0.976471	0.706647
1.42723		1.03285		1.75135	1.26741			0.421053	0.304705			1.35714	0.98213			1.3526	0.978844
1.12903		0.817052		1.04348	0.755139			0.638889	0.462348			0.823529	0.595968			1.1875	0.859364
0.948718		0.686563		1.14545	0.828937			0.98	0.709201			2.08333	1.50766			0.704762	0.510019
0.98249		0.711004		1.42045	1.02795			1.46154	1.05768			1.64706	1.19194			1.16129	0.840397
2.12389		1.53701		0.90991	0.658479			1.02083	0.738751			1.96721	1.42362			1.26277	0.913838
1.97368		1.42831		0.737705	0.533859			1.01695	0.735941			0.949153	0.686878			1.47748	1.06921
1.70909		1.23683		2.09184	1.51381			0.892857	0.646138							1.32247	0.95704
1.34118		0.970576		1.66667	1.20612			0.862745	0.624347							1.15068	0.832722
0.952381		0.689214		1.2931	0.935787			1.18	0.853936							0.80625	0.583463
1.75		1.26643		0.801887	0.580305			0.608696	0.440498							0.8	0.57894
1.07843		0.780434		0.494071	0.357547			1.80488	1.30614							1.62602	1.17671
1.16078		0.84003		0.416667	0.301531			0.761468	0.551055							1.07368	0.776998
1.77857		1.28711		0.631579	0.457058			0.504202	0.364878							0.743902	0.538344
2.05		1.48353		2.15	1.5559			1.575	1.13979							1.16667	0.844287
1.26316		0.914116		0.715084	0.517488			0.816456	0.590849							0.835443	0.604589
1.44056		1.0425														1.75	1.26643
2.14103		1.54941														1.40145	1.01419
1.56471		1.13234														1.19853	0.867346
1.9403		1.40415
1.73377		1.25468
1.14729		0.830263
3.06522		2.21822
2.29369		1.65989

## Sheet: Raw fibers BRCA2 --
Count	Red (CldU)	Green (IdU)	Red (CldU)	Green (IdU)	Red (CldU)	Green (IdU)	Extra	Total Red	Total Green		Ratio	Avg	WT Norm		Avg Norm
1	8.1	6.35									0.783951	1.05786
2	11	7.3									0.663636
3	4.6	10.2									2.21739
4	5.1	14.5	11.6					16.7	14.5		0.868263
5	5.2	8.65									1.66346
6	7.4	5.5	6.5	5.6				13.9	11.1		0.798561
7	5.11	5.7									1.11546
8	4.8	4.58									0.954167
9	6.5	10									1.53846
10	6.7	13.3									1.98507
11	5.1	10.7	5.9					11	10.7		0.972727
12	5.3	6.5									1.22642
13	7.1	1.6									0.225352
14	6.8	5	5.27	8.1				12.07	13.1		1.08534
15	6	2.8									0.466667
16	7.5	10.5									1.4
17	9.2	12	7					16.2	12		0.740741
18	6.45	5.5									0.852713
19	5.5	7.85									1.42727
20	5.6	7.47									1.33393
21	8.15	6.85									0.840491
22	9.15	6									0.655738
23	6	3.6									0.6
24	5.6	5.8									1.03571
25	6.8	6.44	6.45	9.5				13.25	15.94		1.20302
26	4.5	2.8									0.622222
27	6.2	8.15	7	6.6				13.2	14.75		1.11742
28	6.5	5.7	5.9	5.9				12.4	11.6		0.935484
29	8.85	11.9									1.34463
30	12	9.4									0.783333
31	9.16	6.45									0.704148
32	13.4	13.8									1.02985
33	8.65	17.5	8.5					17.15	17.5		1.02041
34	7.5	5.6									0.746667
35	8.7	3.9									0.448276
36	7	6.2									0.885714
37	6.3	5.3	3.9	7.3				10.2	12.6		1.23529
38	6.3	5.8									0.920635
39	5.5	7.6									1.38182
40	6.1	5.1									0.836066
41	8.3	10									1.20482
42	14.6	11.2									0.767123
43	8	9.5									1.1875
44	7	12.2	7.1					14.1	12.2		0.865248
45	13.5	12.5	7.45					20.95	12.5		0.596659
46	3.5	7.6									2.17143
47	5.5	11.19	5.9	8.45				11.4	19.64		1.72281
48	6.5	6.8	5.11	6.5				11.61	13.3		1.14556
49	6.25	3.5	5.4	3.5				11.65	7		0.600858
50	8.8	11.4	9.67	6.5				18.47	17.9		0.969139
51	6.75	5.4									0.8
52	15	8									0.533333
53	6	4.6									0.766667
54	7.8	10.3									1.32051
55	11.2	8.8									0.785714
56	10.9	20.7	10	8.65				20.9	29.35		1.40431
57	6.7	10.8									1.61194
58	12.2	11.9									0.97541
59	11.7	12.5									1.06838
60	18.5	11.5									0.621622
61	7	6									0.857143
62	7.1	7.9									1.11268
63	12.8	7.9		7.6				12.8	15.5		1.21094
64	6.1	8.15	15.3					21.4	8.15		0.380841
65	7.12	5.5									0.772472
66	4.6	8.9									1.93478
67	6.8	9.4									1.38235
68	7.7	6.8									0.883117
69	19	7.3		8.6				19	15.9		0.836842
70	6.8	13	6.6					13.4	13		0.970149
71	8	5.75	8.6	4.75				16.6	10.5		0.63253
72	5.3	12.54	7.5	12				12.8	24.54		1.91719
73	9.5	7.8									0.821053
74	7.8	8.5									1.08974
75	4.4	6.75	4.58					8.98	6.75		0.75167
76	6.6	5.25									0.795455
77	8.5	11	5.9	10.15				14.4	21.15		1.46875
78	12	10.3									0.858333
79	9	6									0.666667
80	8.8	7.8									0.886364
81	4	11									2.75
82	11.2	8.5									0.758929
83	9.7	5									0.515464
84	6.5	9.8									1.50769
85	12.2	16									1.31148
86	15.6	10.5	12.1	7.5				27.7	18		0.649819
87	3.5	10.5									3
88	13.4	10.8									0.80597
89	7.2	15	11.86	12.3				19.06	27.3		1.43232
90	7	6.5									0.928571
91	7.5	3.6									0.48
92	5.8	3.6									0.62069
93	6.8	6.7									0.985294
94	4.4	7	6.3	6.1				10.7	13.1		1.2243
95	12.4	8.35									0.673387
96	10.7	8									0.747664
97	8.7	7									0.804598
98	6.15	8.2	3.1	8				9.25	16.2		1.75135
99	4.6	4.8									1.04348
100	16.5	18.9									1.14545
101	17.6	25									1.42045
102	11.1	10.1									0.90991
103	12.2	9									0.737705
104	4	7.5	5.8	13				9.8	20.5		2.09184
105	5.4	9									1.66667
106	5.8	7.5									1.2931
107	5	8.5	5.6					10.6	8.5		0.801887
108	11	5	14.3	7.5				25.3	12.5		0.494071
109	12	5									0.416667
110	6.1	7.8	6.25					12.35	7.8		0.631579
111	6	12.9									2.15
112	7.4	12.8	10.5					17.9	12.8		0.715084
113
114
115
116
117
118
119
120
	Last pic 33

## Sheet: Raw fibers WT
Count	Red (CldU)	Green (IdU)	Red (CldU)	Green (IdU)	Red (CldU)	Green (IdU)	Extra	Total Red	Total Green		Ratio	Avg	WT Norm		Avg Norm
1	8.2	7.5									0.914634	1.38184
2	5	6	5.5	7.3				10.5	13.3		1.26667
3	5	5.25		6.2				5	11.45		2.29
4	5.5	5.1									0.927273
5	4.4	2.6	4.25	4.7				8.65	7.3		0.843931
6	4	5	3.5	5				7.5	10		1.33333
7	3.5	4.5									1.28571
8	6.5	4.6									0.707692
9	7	5.5									0.785714
10	3.7	3.5	5	4.6				8.7	8.1		0.931034
11	9.5	7.1		4				9.5	11.1		1.16842
12	7.4	6									0.810811
13	5.5	5.1									0.927273
14	5	7.2									1.44
15	9.2	9.6	9.2	10.7				18.4	20.3		1.10326
16	6	12.6									2.1
17	6	9.7	5	2	5.3			16.3	11.7		0.717791
18	9.2	4.8		3.8				9.2	8.6		0.934783
19	3.7	5									1.35135
20	5.3	4.4	4.1	4.1				9.4	8.5		0.904255
21	3.45	6									1.73913
22	15	9		11					15	20	1.33333
23	6.4	7.5									1.17188
24	4.3	11	3.25						7.55	11	1.45695
25	7	6.75	18.6	6.6					25.6	13.35	0.521484
26	7.3	11									1.50685
27	6	9.2									1.53333
28	4.24	7.4									1.74528
29	3.7	4.9	3	6.5				6.7	11.4		1.70149
30	3.8	4.5	4	4.7				7.8	9.2		1.17949
31	9.3	8.3	10.1	5.6				19.4	13.9		0.716495
32	4.45	11.8									2.65169
33	10.5	12.9									1.22857
34	9	11.5									1.27778
35	5	6.45	4.9	8.5				9.9	14.95		1.5101
36	7.5	9.88									1.31733
37	6.4	8.5	5.8	8.6				12.2	17.1		1.40164
38	7.15	6									0.839161
39	5	10.5									2.1
40	4.4	9.8									2.22727
41	5.3	5.3									1
42	3.5	5.5	3.3	5.4				6.8	10.9		1.60294
43	4.5	7									1.55556
44	4.3	4.25	5	4.3				9.3	8.55		0.919355
45	4	6.45									1.6125
46	6.3	5	5.6	5				11.9	10		0.840336
47	3.75	6.3	4	7				7.75	13.3		1.71613
48	5	6									1.2
49	6	9									1.5
50	4.5	5.6									1.24444
51	4	6.3									1.575
52	4.3	4.2	5.1	5.9				9.4	10.1		1.07447
53	6.7	4.5									0.671642
54	6.3	6.7									1.06349
55	7.9	7.5									0.949367
56	10	9.3									0.93
57	8.3	10	11.1	9				19.4	19		0.979381
58	7	6.5	5.6	6				12.6	12.5		0.992063
59	5.8	6.3									1.08621
60	4.6	10.5									2.28261
61	5.3	10.7	3.5					8.8	10.7		1.21591
62	5	9.3	5	10.5				10	19.8		1.98
63	5.7	4.9		5.7				5.7	10.6		1.85965
64	9.8	17.5									1.78571
65	6.8	5.5	5.6	5.6				12.4	11.1		0.895161
66	4	5.3									1.325
67	4	3.1	3.2	4.5				7.2	7.6		1.05556
68	6.6	4.3									0.651515
69	7.7	7									0.909091
70	4	14	5.4					9.4	14		1.48936
71	6	15.5	8.5					14.5	15.5		1.06897
72	6	3.7									0.616667
73	6.3	8									1.26984
74	4.25	5.4									1.27059
75	2.7	5.4	5.2	5.7				7.9	11.1		1.40506
76	4.7	6.2									1.31915
77	6.75	8									1.18519
78	7.65	14.4									1.88235
79	4.5	11									2.44444
80	5	9	2					7	9		1.28571
81	8.5	8									0.941176
82	6.3	6.5									1.03175
83	4	4.1									1.025
84	6.5	4									0.615385
85	4.4	6.2									1.40909
86	3.25	4	3	3.35				6.25	7.35		1.176
87	4.2	6.25	3.75	7				7.95	13.25		1.66667
88	3.9	10.1									2.58974
89	4.76	10									2.10084
90	6.25	4.9									0.784
91	5	8.65									1.73
92	5	8.5	4.1	7.8				9.1	16.3		1.79121
93	4.8	6.8									1.41667
94	4.25	10									2.35294
95	3.73	6.45	4.4	8				8.13	14.45		1.77737
96	5	7									1.4
97	5.45	7.65									1.40367
98	4.75	6.8	5.9	8.4				10.65	15.2		1.42723
99	6.2	7									1.12903
100	7.8	7.4									0.948718
101	4.58	4	5.7	6.1				10.28	10.1		0.98249
102	5.65	12									2.12389
103	3.8	7.5									1.97368
104	5.5	9.4									1.70909
105	4.25	5.7									1.34118
106	6.3	6									0.952381
107	4	7									1.75
108	5.1	5.5									1.07843
109	7.15	6.2	5.6	8.6				12.75	14.8		1.16078
110	4.2	7.47									1.77857
111	6	12.3									2.05
112	9.5	12									1.26316
113	7.15	10.3									1.44056
114	7.8	8.9		7.8				7.8	16.7		2.14103
115	4.25	6.65									1.56471
116	4.25	8.5	5.8	11				10.05	19.5		1.9403
117	3.1	6.4	4.6	6.95				7.7	13.35		1.73377
118	6.45	7.4									1.14729
119	4.6	14.1									3.06522
120	4.12	9.45									2.29369
	Last pic 23

## Sheet: Raw fibers S12
Count	Red (CldU)	Green (IdU)	Red (CldU)	Green (IdU)	Red (CldU)	Green (IdU)	Extra	Total Red	Total Green		Ratio	Avg	WT Norm		Avg Norm
1	4	3									0.75	1.05423
2	5.9	3.6									0.610169
3	7	4.2									0.6
4	4	5									1.25
5	3.5	6									1.71429
6	8.5	7.1									0.835294
7	4.5	3.4									0.755556
8	3	2.2									0.733333
9	10.5	5.6		10.9				10.5	16.5		1.57143
10	4.25	5									1.17647
11	5	6.1									1.22
12	5.1	5.6									1.09804
13	3.6	4.6									1.27778
14	5.5	6.6									1.2
15	4.1	3.3									0.804878
16	5.7	5.27	3.8	3.9				9.5	9.17		0.965263
17	7.7	3.4									0.441558
18	3.6	4.1									1.13889
19	5.2	2.3	3.9	3.56				9.1	5.86		0.643956
20	2.4	4.5		4.24				2.4	8.74		3.64167
21	6	5									0.833333
22	4.1	3.76									0.917073
23	3.5	4.75									1.35714
24	4.8	5.3									1.10417
25	3.9	6.5	3.5	6.5				7.4	13		1.75676
26	5.75	3.4									0.591304
27	4.4	3		2.4				4.4	5.4		1.22727
28	6.65	6.75									1.01504
29	4.4	8.9									2.02273
30	4	6									1.5
31	11	14									1.27273
32	5.8	4.6									0.793103
33	5.1	9.7									1.90196
34	5	4									0.8
35	5.9	5.77	6.9	6.3				12.8	12.07		0.942969
36	4.75	5.3									1.11579
37	6	5.6									0.933333
38	5.5	4.4									0.8
39	4	7.8									1.95
40	7.4	5									0.675676
41	11.5	5	7.3	8.6				18.8	13.6		0.723404
42	4	3.6									0.9
43	6	6.7									1.11667
44	6.6	3.5									0.530303
45	5.5	5.1									0.927273
46	5	8.1									1.62
47	4.4	6.27									1.425
48	5.3	5.5	4	6.45				9.3	11.95		1.28495
49	8.8	7.6									0.863636
50	10.2	11.6									1.13725
51	5	15	6.5					11.5	15		1.30435
52	8.85	4.6									0.519774
53	8	3.25									0.40625
54	4.25	2.7									0.635294
55	5.95	4.5									0.756303
56	6.8	5.6									0.823529
57	5.6	8									1.42857
58	5.5	2.4									0.436364
59	2.2	6									2.72727
60	6.65	7.4									1.11278
61	4.8	5.7									1.1875
62	5	3									0.6
63	5.6	9.6									1.71429
64	4.8	3.5	5.5	4.1				10.3	7.6		0.737864
65	6.4	7.4									1.15625
66	5.4	2.5									0.462963
67	5.4	4.4									0.814815
68	5.3	5.6									1.0566
69	7.5	2.75									0.366667
70	8.4	3.6		2.55				8.4	6.15		0.732143
71	3.6	4.7									1.30556
72	5.1	6.4									1.2549
73	3.5	3.5									1
74	5.1	5.2									1.01961
75	4.56	3.75									0.822368
76	4.5	5.1									1.13333
77	4.7	2	4.2	2.9				8.9	4.9		0.550562
78	4.4	3.7									0.840909
79	3.75	10									2.66667
80	7.4	6									0.810811
81	6.1	8.8									1.44262
82	7.3	7.5									1.0274
83	7	6.1									0.871429
84	8.4	8									0.952381
85	11	5.3									0.481818
86	8.1	6									0.740741
87	3	6.9									2.3
88	4.4	5.6									1.27273
89	8.3	5.7									0.686747
90	4.3	3.75									0.872093
91	6.3	6									0.952381
92	6.2	2.7	4.3	5				10.5	7.7		0.733333
93	5.4	3									0.555556
94	6.6	6.4									0.969697
95	7.3	9.4									1.28767
96	4.75	4.4									0.926316
97	5.3	3.2									0.603774
98	9.5	4									0.421053
99	3.6	2.3									0.638889
100	5	4.9									0.98
101	6.5	9.5									1.46154
102	4.8	4.9									1.02083
103	5.9	6									1.01695
104	5.6	5									0.892857
105	5.1	4.4									0.862745
106	5	5.9									1.18
107	6.9	4.2									0.608696
108	4.1	7.4									1.80488
109	10.9	8.3									0.761468
110	5.4	6	6.5					11.9	6		0.504202
111	4	6.3									1.575
112	7.9	6.45									0.816456
113
114
115
116
117
118
119
120
	Last pic 36

## Sheet: Raw fibers T13
Count	Red (CldU)	Green (IdU)	Red (CldU)	Green (IdU)	Red (CldU)	Green (IdU)	Extra	Total Red	Total Green		Ratio	Avg	WT Norm		Avg Norm
1	4.1	5.4									1.31707	1.34995
2	4.4	3.75									0.852273
3	2	6.3	3.5	5				5.5	11.3		2.05455
4	6.1	13									2.13115
5	4.4	7.5									1.70455
6	3.75	4.75	3.7					7.45	4.75		0.637584
7	2.5	3.6	2.9	3.4				5.4	7		1.2963
8	2	6	2.2					4.2	6		1.42857
9	5	8.5	3.2					8.2	8.5		1.03659
10	5	4.75	7.5	4				12.5	8.75		0.7
11	5.75	4.6	4.25	3.5				10	8.1		0.81
12	3.75	5									1.33333
13	3.8	4.4									1.15789
14	5	5.5									1.1
15	5	3.9									0.78
16	3.7	4.25									1.14865
17	4.5	4	5.7	4.75				10.2	8.75		0.857843
18	4	4.25									1.0625
19	4.2	6.2									1.47619
20	3.3	3.75									1.13636
21	5.1	6.1									1.19608
22	4.6	6.8									1.47826
23	6.45	10									1.55039
24	4.5	6.5									1.44444
25	5.5	6.8									1.23636
26	3.2	3.5	2.25	2.6				5.45	6.1		1.11927
27	6.5	7		8				6.5	15		2.30769
28	3.3	3.56	2.8	3				6.1	6.56		1.07541
29	3	3.9									1.3
30	4.8	4									0.833333
31	4.25	3.4		4				4.25	7.4		1.74118
32	6.7	3.4		3.5				6.7	6.9		1.02985
33	4.3	6									1.39535
34	3.9	4.75									1.21795
35	4	5.3									1.325
36	3.75	6.7									1.78667
37	3.75	4.9									1.30667
38	6.6	3									0.454545
39	9.1	3.4									0.373626
40	7.8	2.55									0.326923
41	3.5	5.1									1.45714
42	4.3	4.3									1
43	3.9	3.9	3.5	4.7				7.4	8.6		1.16216
44	2.35	4									1.70213
45	4	7									1.75
46	4.35	3.9									0.896552
47	2	3									1.5
48	4.6	4.5									0.978261
49	3.7	4.7									1.27027
50	3.73	4	3.56	4.7				7.29	8.7		1.19342
51	3.7	8.65									2.33784
52	4.4	6.7									1.52273
53	6.38	4.4									0.689655
54	4.1	4.8									1.17073
55	3.3	4.4									1.33333
56	2.1	3.73									1.77619
57	2.55	3.4	2.8	4				5.35	7.4		1.38318
58	2.8	3.35									1.19643
59	3.22	5.4									1.67702
60	2.3	4.9									2.13043
61	3.1	7.35	1.2					4.3	7.35		1.7093
62	3.3	3.1	2.1	3				5.4	6.1		1.12963
63	3	4.8									1.6
64	4.1	5.8									1.41463
65	3.75	5.3	4.1	6.11				7.85	11.41		1.4535
66	2.6	4.9									1.88462
67	3.5	5.6									1.6
68	5	6.3									1.26
69	4	8.4									2.1
70	5	2.5	4.75	2				9.75	4.5		0.461538
71	3.9	3									0.769231
72	2.7	7.4									2.74074
73	3.5	5.65									1.61429
74	9.5	7.4		5.6				9.5	7.4		0.778947
75	5.3	4	6.45	7.8				11.75	11.8		1.00426
76	2.5	4.8									1.92
77	8	6.45		2				8	8.45		1.05625
78	3.2	5.7									1.78125
79	3.5	6.8									1.94286
80	3.7	6.5									1.75676
81	3	6	2.3					5.3	6		1.13208
82	4.2	5.4		5.1				4.2	10.5		2.5
83	2.5	3.8									1.52
84	3.6	2.6									0.722222
85	3.2	3.3	2.2	4.25				5.4	7.55		1.39815
86	3.8	4		4				3.8	8		2.10526
87	3.7	3.25									0.878378
88	3.3	4.7									1.42424
89	5.4	4.9									0.907407
90	2.9	5.5									1.89655
91	8	12									1.5
92	3.2	4.7									1.46875
93	4	3.6									0.9
94	5	5.7									1.14
95	4.7	5									1.06383
96	3.6	5.2									1.44444
97	2.2	3.5									1.59091
98	3.5	4.75									1.35714
99	3.4	2.8									0.823529
100	3.3	5.6	1.5	4.4				4.8	10		2.08333
101	2.7	4.9	2.4	3.5				5.1	8.4		1.64706
102	3	6	3.1	6				6.1	12		1.96721
103	3	1	2.9	4.6				5.9	5.6		0.949153
104
105
106
107
108
109
110
111
112
113
114
115
116
117
118
119
120
	Last pic 33

## Sheet: Raw fibers T19
Count	Red (CldU)	Green (IdU)	Red (CldU)	Green (IdU)	Red (CldU)	Green (IdU)	Extra	Total Red	Total Green		Ratio	Avg	WT Norm		Avg Norm
1	8.8	13.25									1.50568	1.23079
2	8.15	9.5									1.16564
3	9.6	10.5									1.09375
4	9.6	12.9									1.34375
5	14.4	15.5									1.07639
6	4.5	6.7	4	6.15				8.5	12.85		1.51176
7	7.1	6.1	7.3	9.3				14.4	15.4		1.06944
8	6.6	11.5									1.74242
9	6.78	7.2									1.06195
10	16.1	9.3		2.5				16.1	11.8		0.732919
11	8.7	7.7		4				8.7	11.7		1.34483
12	4.3	6.2									1.44186
13	6	7.2									1.2
14	5.4	6.6		6.45				5.4	13.05		2.41667
15	8.3	8									0.963855
16	15.6	18									1.15385
17	5.8	8.6									1.48276
18	8.3	7.3									0.879518
19	4	10									2.5
20	5.5	8.3									1.50909
21	7	8.65									1.23571
22	10	8.66		9.3				10	17.96		1.796
23	8.3	6.44									0.775904
24	7	7.5									1.07143
25	6.5	8.6									1.32308
26	14	30	23	38				37	68		1.83784
27	7.7	6.3									0.818182
28	6.6	8.5									1.28788
29	14.8	14.6									0.986486
30	26	11									0.423077
31	5.8	7.3									1.25862
32	6	7.6									1.26667
33	6	9									1.5
34	6	10									1.66667
35	11	14.3	7.6	15.6				18.6	29.9		1.60753
36	10	12.9									1.29
37	13.5	12	5.5	9.8				19	21.8		1.14737
38	10.6	7.5									0.707547
39	6.6	11.4									1.72727
40	12.2	10.5		8.8				12.2	19.3		1.58197
41	6.8	13									1.91176
42	5	8									1.6
43	6	6.7									1.11667
44	9.5	4.2									0.442105
45	6.3	5.3									0.84127
46	5.6	7.7	4.5	10				10.1	17.7		1.75248
47	14.1	4									0.283688
48	10.5	7.15									0.680952
49	9.4	18.5									1.96809
50	4.9	5.75	6.3	6.75				11.2	12.5		1.11607
51	10.5	4.1									0.390476
52	5.5	8.5									1.54545
53	6.6	6.4									0.969697
54	9.6	12									1.25
55	5.5	19.7	12.7					18.2	19.7		1.08242
56	6	5.8									0.966667
57	5.6	4.6									0.821429
58	8	11.2									1.4
59	6.8	21.5	6	14.75				12.8	36.25		2.83203
60	12.3	15.1									1.22764
61	5.5	8.3	7.35	12				12.85	20.3		1.57977
62	6.8	13.7									2.01471
63	11.1	9									0.810811
64	9.15	10.68									1.16721
65	9	8.65									0.961111
66	7.5	12	9.3	10.8				16.8	22.8		1.35714
67	7.8	7.6									0.974359
68	7.8	12.8									1.64103
69	11.5	9									0.782609
70	9.9	12.7									1.28283
71	12.1	13.6									1.12397
72	9	8.5									0.944444
73	9	10.8									1.2
74	6.5	6									0.923077
75	6	9.6									1.6
76	11.4	23.6									2.07018
77	4	5.4	6.6	4.5				10.6	9.9		0.933962
78	7.2	8.4									1.16667
79	12.2	15.6	12.2	17				24.4	32.6		1.33607
80	12.6	13.3									1.05556
81	8.3	8									0.963855
82	7.1	10.7									1.50704
83	10.6	10.1									0.95283
84	13.1	15.8									1.20611
85	13	13.6									1.04615
86	8.5	12.8									1.50588
87	6.8	10									1.47059
88	5.2	8									1.53846
89	8.85	8.5									0.960452
90	7.5	6.5									0.866667
91	8.3	5.5									0.662651
92	6.1	6.6									1.08197
93	7	6.3									0.9
94	22	15.5									0.704545
95	11.8	15.26	10.8	18.2				22.6	33.46		1.48053
96	12.9	13.75									1.06589
97	8.5	8.3									0.976471
98	8.65	11.7									1.3526
99	12	14.25									1.1875
100	10.5	7.4									0.704762
101	9.3	10.8									1.16129
102	13.7	17.3									1.26277
103	11.1	16.4									1.47748
104	8.9	11.77									1.32247
105	7.3	8.4									1.15068
106	8	6.45									0.80625
107	7.25	5.8									0.8
108	12.3	20									1.62602
109	4.75	5.1									1.07368
110	8.2	6.1									0.743902
111	6	7									1.16667
112	7.9	6.6									0.835443
113	4	7									1.75
114	4.6	15.5	6.46					11.06	15.5		1.40145
115	6.1	7.6	7.5	8.7				13.6	16.3		1.19853
116
117
118
119
120
	Last pic 20

## Sheet: Stats
WT	BRCA2 -/-	S12	T13	T19
0.661898	0.567325	0.542756	0.953133	1.08962		t-Test: Two-Sample Assuming Equal Variances				t-Test: Two-Sample Assuming Equal Variances
0.916655	0.480257	0.441564	0.616768	0.843547
1.65722	1.60467	0.434205	1.48682	0.791519			Variable 1	Variable 2			Variable 1	Variable 2
0.671044	0.628341	0.904594	1.54226	0.972438		Mean	1	0.765545		Mean	1	0.762921
0.610731	1.20381	1.24059	1.23354	0.778956		Variance	0.127527	0.122541		Variance	0.127527	0.134439
0.9649	0.577899	0.604481	0.461403	1.09403		Observations	120	112		Observations	120	112
0.930439	0.80723	0.546777	0.938097	0.77393		Pooled Variance	0.125121			Pooled Variance	0.130863
0.512139	0.690506	0.530695	1.03382	1.26095		Hypothesized Mean Difference	0			Hypothesized Mean Difference	0
0.568602	1.11335	1.1372	0.750151	0.768504		df	230			df	230
0.673766	1.43655	0.851382	0.506572	0.530395		t Stat	5.04488			t Stat	4.98816
0.845557	0.703938	0.882883	0.586177	0.973218		P(T<=t) one-tail	4.60484e-07			P(T<=t) one-tail	6.00749e-07
0.586763	0.887526	0.794623	0.9649	1.04344		t Critical one-tail	1.65151			t Critical one-tail	1.65151
0.671044	0.163082	0.924696	0.837939	0.86841		P(T<=t) two-tail	9.20968e-07			P(T<=t) two-tail	1.2015e-06
1.04209	0.78543	0.86841	0.796042	1.74888		t Critical two-tail	1.97033			t Critical two-tail	1.97033
0.798402	0.337715	0.58247	0.564466	0.697518
1.51972	1.01314	0.698537	0.831248	0.83501
0.519448	0.536055	0.319545	0.6208	1.07304		t-Test: Two-Sample Assuming Equal Variances				t-Test: Two-Sample Assuming Equal Variances
0.676479	0.617087	0.824185	0.768905	0.636485
0.977939	1.03288	0.466015	1.06828	1.80919			Variable 1	Variable 2			Variable 1	Variable 2
0.654387	0.965331	2.63538	0.822358	1.09209		Mean	1	0.976928		Mean	1	0.890695
1.25857	0.608242	0.603062	0.865572	0.894255		Variance	0.127527	0.115141		Variance	0.127527	0.0919497
0.9649	0.474541	0.663663	1.06978	1.29972		Observations	120	103		Observations	120	115
0.848057	0.434205	0.98213	1.12198	0.561502		Pooled Variance	0.12181			Pooled Variance	0.11012
1.05436	0.74952	0.799058	1.04531	0.775366		Hypothesized Mean Difference	0			Hypothesized Mean Difference	0
0.377385	0.870595	1.27132	0.894725	0.957478		df	221			df	233
1.09047	0.450287	0.427912	0.809985	1.33		t Stat	0.492151			t Stat	2.52414
1.10963	0.808652	0.888146	1.67002	0.592098		P(T<=t) one-tail	0.311551			P(T<=t) one-tail	0.00613211
1.26302	0.676986	0.734557	0.778247	0.932006		t Critical one-tail	1.65178			t Critical one-tail	1.65142
1.23133	0.973077	1.4638	0.940777	0.713896		P(T<=t) two-tail	0.623101			P(T<=t) two-tail	0.0122642
0.853565	0.566879	1.08551	0.603062	0.30617		t Critical two-tail	1.97076			t Critical two-tail	1.9702
0.518509	0.509575	0.921041	1.26005	0.910832
1.91896	0.745277	0.573949	0.745277	0.916655
0.889086	0.738444	1.3764	1.00978	1.08551
0.924696	0.540344	0.57894	0.881399	1.20612
1.09282	0.324406	0.682403	0.958869	1.16333
0.953321	0.640969	0.807469	1.29297	0.933541
1.01433	0.893951	0.67543	0.945602	0.830322
0.60728	0.66624	0.57894	0.328943	0.512034
1.51972	0.999987	1.41117	0.270384	1.24998
1.61182	0.60504	0.48897	0.236586	1.14483
0.723675	0.871897	0.52351	1.0545	1.3835
1.16001	0.555148	0.651307	0.723675	1.15788
1.12572	0.859364	0.808104	0.841028	0.808104
0.665314	0.626158	0.383767	1.23179	0.31994
1.16693	0.431787	0.671044	1.26643	0.608806
0.60813	1.57141	1.17235	0.648812	1.26822
1.24192	1.24675	1.03124	1.08551	0.205298
0.86841	0.829016	0.929883	0.707943	0.492788
1.08551	0.434826	0.624992	0.919263	1.42425
0.900573	0.701342	0.823003	0.863645	0.807673
1.13979	0.57894	0.943924	1.69183	0.282578
0.777566	0.38596	0.376147	1.10196	1.11841
0.48605	0.554817	0.293993	0.499086	0.701745
0.769623	0.955622	0.459746	0.847229	0.904594
0.687033	0.568602	0.547317	0.9649	0.783318
0.673018	1.01626	0.595968	1.28538	0.699552
0.708754	1.16652	1.03382	1.00097	0.594447
0.717931	0.70588	0.315785	0.865825	1.01314
0.786061	0.773157	1.97366	1.21362	2.04947
1.65187	0.449852	0.805292	1.54174	0.888414
0.879923	0.620293	0.859364	1.23698	1.14324
1.43288	0.805216	0.434205	0.817485	1.45799
1.34578	0.876325	1.24059	1.15788	0.586763
1.29228	0.275605	0.533974	1.02374	0.844683
0.647806	0.559019	0.836749	1.05186	0.695532
0.958869	1.40015	0.335035	1.36385	0.98213
0.763879	1.00037	0.589661	1.15788	0.705119
0.471485	0.63909	0.764638	0.91183	1.18757
0.657886	0.605602	0.265347	1.51972	0.566354
1.07781	0.702073	0.529833	0.334004	0.928351
0.773584	0.457746	0.944798	0.556673	0.813387
0.446266	1.38742	0.908141	1.98341	0.683471
0.918952	0.594175	0.723675	1.16822	0.86841
0.919493	0.78862	0.737865	0.563705	0.668008
1.01681	0.543965	0.595127	0.726754	1.15788
0.954635	0.575651	0.820165	1.38946	1.49813
0.857689	1.0629	0.398428	0.764382	0.675885
1.36221	0.621154	0.608545	1.28905	0.844287
1.76898	0.48245	1.9298	1.406	0.966877
0.930439	0.641439	0.586763	1.27132	0.763879
0.681106	1.99011	1.04399	0.819255	0.697518
0.746649	0.549218	0.743502	1.80919	1.09061
0.741767	0.373028	0.630631	1.09999	0.689539
0.445338	1.09108	0.689214	0.522654	0.872829
1.01972	0.949082	0.34868	1.0118	0.757075
0.851042	0.470258	0.536055	1.52353	1.08977
1.20612	2.17102	1.66445	0.63566	1.06423
1.87413	0.58326	0.921041	1.03069	1.11335
1.52033	1.03653	0.496982	0.656668	0.695055
0.567361	0.671984	0.631112	1.37249	0.627185
1.25196	0.347364	0.689214	1.08551	0.479544
1.29625	0.449178	0.530695	1.0629	0.782993
1.02521	0.713033	0.402042	0.651307	0.651307
1.70276	0.885995	0.701745	0.824989	0.509862
1.28624	0.487313	0.931855	0.769867	1.07142
1.01314	0.541065	0.670352	1.04531	0.771359
1.0158	0.582267	0.436936	1.1513	0.706647
1.03285	1.26741	0.304705	0.98213	0.978844
0.817052	0.755139	0.462348	0.595968	0.859364
0.686563	0.828937	0.709201	1.50766	0.510019
0.711004	1.02795	1.05768	1.19194	0.840397
1.53701	0.658479	0.738751	1.42362	0.913838
1.42831	0.533859	0.735941	0.686878	1.06921
1.23683	1.51381	0.646138		0.95704
0.970576	1.20612	0.624347		0.832722
0.689214	0.935787	0.853936		0.583463
1.26643	0.580305	0.440498		0.57894
0.780434	0.357547	1.30614		1.17671
0.84003	0.301531	0.551055		0.776998
1.28711	0.457058	0.364878		0.538344
1.48353	1.5559	1.13979		0.844287
0.914116	0.517488	0.590849		0.604589
1.0425				1.26643
1.54941				1.01419
1.13234				0.867346
1.40415
1.25468
0.830263
2.21822
1.65989
