# Supplementary material for: BRCA2 BRC missense variants disrupt RAD51-dependent DNA repair
Source: eLife journal article supplement (doi:10.7554/elife.79183), 2022-09-13
Supplement: fig4-figsupp1-data1 [file Figure 4-figure supplement 1A-source data9-quantification wb.xlsx]

## Sheet: Data
Supplementary Figure 4A Source data
Unpaired t-test of each sample compare to BRCA2-/-
BRCA2-/-	BRCA2 WT	S1221P	T1346I	T1980I
0.2	0.26	0.27	0.25	0.26
0.12	0.28	0.44	0.41	0.37
0.1	0.28	0.45	0.33	0.34

## Sheet: Raw data
Western Blot TCL DLD1 Figure 2 BRC paper
Jimenez Sainz, Judit 2020-10-21 17hr 36min_Exposure_1.0sec
No.	Label	Type	Volume (Int)	Adj. Vol. (Int)			Average DLD1-/-
1	U1	DLD1-/-	4686200	2.06583e+06	0.341494		0.166656	Ratio
2	U2	BRCA2 WT	7748607	4.59094e+06	0.535659				0.261413
3	U3	S1221P	7219675	3.61658e+06	0.554448				0.270582
4	U4	T1346I	7345954	3.88954e+06	0.514992				0.251327
5	U5	T1980I	7762743	3.65503e+06	0.525942				0.256671
StainFree2020-10-15 17hr 32min
No.	Label	Type	Volume (Int)	Adj. Vol. (Int)
1	U1	DLD1-/-	13722656	4.22089e+06
2	U2	BRCA2 WT	14465572	3.21574e+06
3	U3	S1221P	13021372	1.32843e+06
4	U4	T1346I	14264216	5.20862e+06
5	U5	T1980I	14759704	1.34764e+06
Western Blot TCL DLD1
Jimenez Sainz, Judit 2021-05-27 15hr 56min_Exposure_1.0sec
No.	Label	Type	Volume (Int)	Adj. Vol. (Int)
1	U1	DLD1-/-	4194852	2.56037e+06	0.118764		0.17
2	U2	BRCA2 WT	9229100	5.62298e+06	0.19876				0.278912
3	U3	S1221P	10378300	6.7142e+06	0.312205				0.438105
4	U4	T1346I	11698768	7.99973e+06	0.291934				0.40966
5	U5	T1980I	12590040	9.35919e+06	0.265119				0.372031
StainFree 2021-05-18 15hr 26min
No.	Label	Type	Volume (Int)	Adj. Vol. (Int)
1	U1	DLD1-/-	35321020	9.13771e+06
2	U2	BRCA2 WT	46433308	1.16365e+07
3	U3	S1221P	33241944	4.73964e+06
4	U4	T1346I	40073264	1.16567e+07
5	U5	T1980I	47488272	1.47008e+07
Jimenez Sainz, Judit 2021-06-24 13hr 18min_Exposure_54.4sec
No.	Label	Type	Volume (Int)	Adj. Vol. (Int)
1	U1	DLD1-/-	1106804	327501	0.0397112		0.17
2	U2	BRCA2 WT	1937164	896158	0.0669298				0.280885
3	U3	S1221P	2486260	1.29336e+06	0.106837				0.448362
4	U4	T1346I	1866856	1.0405e+06	0.0785032				0.329454
5	U5	T1980I	1788772	1.21135e+06	0.0817726				0.343175
StainFree BRC FL mutants2021-06-22 15hr 56min
No.	Label	Type	Volume (Int)	Adj. Vol. (Int)
1	U1	DLD1-/-	27871308	4923666
2	U2	BRCA2 WT	28943204	6.09383e+06
3	U3	S1221P	23271556	3.64805e+06
4	U4	T1346I	23780636	3.02004e+06
5	U5	T1980I	21874956	2168934
