# Supplementary material for: BRCA2 BRC missense variants disrupt RAD51-dependent DNA repair
Source: eLife journal article supplement (doi:10.7554/elife.79183), 2022-09-13
Supplement: fig4-figsupp1-data1 [file Figure 4-figure supplement 1B-source data6-quantification wb.xlsx]

## Sheet: Data
Supplementary Figure 4B Source data
Unpaired t-test of each sample compare to BRCA2-/-
Control	2xMBP	BRCA2 WT	S1221P	T1346I	T1980I
0.09		0.28		0.23	0.21
0.027911	0.088989	0.201886	0.213834	0.125536	0.143834
	0.04	0.15	0.18	0.18	0.15
0.056288	0.061218	0.122042	0.16603	0.140427	0.144119

## Sheet: Raw data
2019-10-09
Jimenez Sainz, Judit 2019-09-17 15hr 34min_Exposure_26.7sec				TCL RAD51 first MBP second
No.	Label	Type	Volume (Int)	RAD51/StainFree
1	U1	Unknown	1950132	0.0932891
2	U2	2xMBP	3884712	0.180586			Outliers delete from the final graph
3	U3	BRCA2wt	5753868	0.276216
4	U4	T1346I	4976192	0.229312
5	U5	T1980I	4444976	0.209593
StainFree only T1346I and T1980I 2019-09-12 16hr 22min
No.	Label	Type	Volume (Int)
1	U1	Unknown	20904176
2	U2	2xMBP	21511760
3	U3	BRCA2wt	20831060
4	U4	T1346I	21700548
5	U5	T1980I	21207688
2019-09-17
Jimenez Sainz, Judit 2019-09-17 15hr 28min_Exposure_21.1sec					TCL RAD51
No.	Label	Type	Volume (Int)	RAD51/StainFree
1	U1	Unknown	568556	0.0279106
2	U2	2xMBP	2343052	0.0889895
3	U3	BRCA2wt	4652928	0.201886
4	U4	S1221P	4688532	0.213834
5	U5	T1346I	2984096	0.125536
6	U6	T1980I	3585056	0.143834
StainFree all 2019-09-12 16hr 27min
No.	Label	Type	Volume (Int)
1	U1	Unknown	20370596
2	U2	2xMBP	26329540
3	U3	BRCA2wt	23047308
4	U4	S1221P	21926020
5	U5	T1346I	23770900
6	U6	T1980I	24924988
2020-11-30
Jimenez Sainz, Judit 2020-11-30 17hr 33min_Exposure_5.0sec					RAD51 in 293T
No.	Label	Type	Volume (Int)	RAD51/StainFree
1	U1	2xMBP	1147812	0.0389689
2	U2	BRCA2wt	4583553	0.154132
3	U3	S1221P	4323067	0.184021
4	U4	T1346I	4412320	0.181656
5	U5	T1980I	3497304	0.152625
StainFree TCL 2020-11-25 17hr 20min				293T
No.	Label	Type	Volume (Int)
1	U1	2xMBP	29454568
2	U2	BRCA2wt	29737752
3	U3	S1221P	23492248
4	U4	T1346I	24289392
5	U5	T1980I	22914364
2020-12-17
Jimenez Sainz, Judit 2020-12-22 18hr 09min_Exposure_3.0sec
No.	Label	Type	Volume (Int)	RAD51/Stain Free
1	U1	Unknown	2174048	0.0562875
2	U2	2xMBP	2872228	0.0612182
3	U3	BRCA2wt	5963016	0.122042
4	U4	S1221P	7048385	0.16603
5	U5	T1346I	5854820	0.140427
6	U6	T1980I	5946604	0.144119
StainFree 2020-12-17 18hr 13min
No.	Label	Type	Volume (Int)
1	U1	Unknown	38623964
2	U2	2xMBP	46917904
3	U3	BRCA2wt	48860524
4	U4	S1221P	42452372
5	U5	T1346I	41692948
6	U6	T1980I	41261832
