# Supplementary material for: BRCA2 BRC missense variants disrupt RAD51-dependent DNA repair
Source: eLife journal article supplement (doi:10.7554/elife.79183), 2022-09-13
Supplement: fig5-figsupp2-data1 [file Figure 5-figure supplement 2A-source data2-raw data.xlsx]

## Sheet: DNA only
Bin Center	Bin End	Count	Cumulative Count	Relative Frequency	Normalized1
Frequency Counts	Frequency Counts	Frequency Counts of A	Frequency Counts of A	Frequency Counts of A	Normalize to [0, 1] of "Relative Frequency"
0.01	0.02	1	1	4.29312e-06	0
0.03	0.04	4	5	1.71725e-05	0.00011515
0.05	0.06	3	8	1.28794e-05	7.67666e-05
0.07	0.08	2	10	8.58623e-06	3.83833e-05
0.09	0.1	4	14	1.71725e-05	0.00011515
0.11	0.12	3	17	1.28794e-05	7.67666e-05
0.13	0.14	4	21	1.71725e-05	0.00011515
0.15	0.16	5	26	2.14656e-05	0.000153533
0.17	0.18	4	30	1.71725e-05	0.00011515
0.19	0.2	5	35	2.14656e-05	0.000153533
0.21	0.22	3	38	1.28794e-05	7.67666e-05
0.23	0.24	3	41	1.28794e-05	7.67666e-05
0.25	0.26	3	44	1.28794e-05	7.67666e-05
0.27	0.28	1	45	4.29312e-06	0
0.29	0.3	4	49	1.71725e-05	0.00011515
0.31	0.32	6	55	2.57587e-05	0.000191916
0.33	0.34	11	66	4.72243e-05	0.000383833
0.35	0.36	16	82	6.86899e-05	0.000575749
0.37	0.38	29	111	0.0001245	0.00107473
0.39	0.4	38	149	0.000163138	0.00142018
0.41	0.42	78	227	0.000334863	0.00295551
0.43	0.44	119	346	0.000510881	0.00452923
0.45	0.46	215	561	0.00092302	0.00821403
0.47	0.48	343	904	0.00147254	0.0131271
0.49	0.5	655	1559	0.00281199	0.0251027
0.51	0.52	1094	2653	0.00469667	0.0419529
0.53	0.54	1808	4461	0.00776196	0.0693586
0.55	0.56	3015	7476	0.0129437	0.115687
0.57	0.58	4694	12170	0.0201519	0.180133
0.59	0.6	7220	19390	0.0309963	0.277089
0.61	0.62	10698	30088	0.0459278	0.410586
0.63	0.64	14872	44960	0.0638472	0.570798
0.65	0.66	19062	64022	0.0818354	0.731624
0.67	0.68	23092	87114	0.0991367	0.886309
0.69	0.7	25702	112816	0.110342	0.986489
0.71	0.72	26054	138870	0.111853	1
0.73	0.74	24009	162879	0.103073	0.921506
0.75	0.76	20571	183450	0.0883137	0.789544
0.77	0.78	16141	199591	0.0692952	0.619506
0.79	0.8	11651	211242	0.0500191	0.447165
0.81	0.82	8214	219456	0.0352637	0.315242
0.83	0.84	5193	224649	0.0222942	0.199286
0.85	0.86	3278	227927	0.0140728	0.125782
0.87	0.88	2061	229988	0.00884811	0.0790696
0.89	0.9	1175	231163	0.00504441	0.045062
0.91	0.92	750	231913	0.00321984	0.0287491
0.93	0.94	449	232362	0.00192761	0.0171957
0.95	0.96	277	232639	0.00118919	0.0105938
0.97	0.98	178	232817	0.000764175	0.00679384
0.99	1	114	232931	0.000489415	0.00433731

## Sheet: BRC Storage Buffer
Bin Center	Bin End	Count	Cumulative Count	Relative Frequency	Normalized1
Frequency Counts	Frequency Counts	Frequency Counts of B	Frequency Counts of B	Frequency Counts of B	Normalize to [0, 1] of "Relative Frequency"
0.01	0.02	7	7	2.12357e-05	0.000182111
0.03	0.04	12	19	3.6404e-05	0.000312191
0.05	0.06	5	24	1.51683e-05	0.00013008
0.07	0.08	1	25	3.03367e-06	2.60159e-05
0.09	0.1	4	29	1.21347e-05	0.000104064
0.11	0.12	7	36	2.12357e-05	0.000182111
0.13	0.14	5	41	1.51683e-05	0.00013008
0.15	0.16	0	41	0	0
0.17	0.18	8	49	2.42693e-05	0.000208127
0.19	0.2	4	53	1.21347e-05	0.000104064
0.21	0.22	5	58	1.51683e-05	0.00013008
0.23	0.24	5	63	1.51683e-05	0.00013008
0.25	0.26	2	65	6.06734e-06	5.20318e-05
0.27	0.28	6	71	1.8202e-05	0.000156096
0.29	0.3	14	85	4.24713e-05	0.000364223
0.31	0.32	19	104	5.76397e-05	0.000494303
0.33	0.34	30	134	9.101e-05	0.000780478
0.35	0.36	45	179	0.000136515	0.00117072
0.37	0.38	92	271	0.000279097	0.00239346
0.39	0.4	115	386	0.000348872	0.00299183
0.41	0.42	206	592	0.000624936	0.00535928
0.43	0.44	299	891	0.000907067	0.00777876
0.45	0.46	481	1372	0.00145919	0.0125137
0.47	0.48	714	2086	0.00216604	0.0185754
0.49	0.5	1167	3253	0.00354029	0.0303606
0.51	0.52	1803	5056	0.0054697	0.0469067
0.53	0.54	2817	7873	0.00854584	0.0732869
0.55	0.56	4657	12530	0.0141278	0.121156
0.57	0.58	6984	19514	0.0211871	0.181695
0.59	0.6	10348	29862	0.0313924	0.269213
0.61	0.62	15205	45067	0.0461269	0.395572
0.63	0.64	20789	65856	0.0630669	0.540845
0.65	0.66	27659	93515	0.0839082	0.719574
0.67	0.68	33700	127215	0.102235	0.876737
0.69	0.7	37653	164868	0.114227	0.979578
0.71	0.72	38438	203306	0.116608	1
0.73	0.74	35568	238874	0.107901	0.925334
0.75	0.76	29515	268389	0.0895387	0.76786
0.77	0.78	22202	290591	0.0673535	0.577605
0.79	0.8	14979	305570	0.0454413	0.389692
0.81	0.82	9664	315234	0.0293174	0.251418
0.83	0.84	5991	321225	0.0181747	0.155861
0.85	0.86	3620	324845	0.0109819	0.0941776
0.87	0.88	2085	326930	0.0063252	0.0542432
0.89	0.9	1157	328087	0.00350995	0.0301004
0.91	0.92	706	328793	0.00214177	0.0183672
0.93	0.94	402	329195	0.00121953	0.0104584
0.95	0.96	214	329409	0.000649205	0.00556741
0.97	0.98	136	329545	0.000412579	0.00353817
0.99	1	89	329634	0.000269996	0.00231542

## Sheet: 20 nM BRC2WT
Bin Center	Bin End	Count	Cumulative Count	Relative Frequency	Normalized1
Frequency Counts	Frequency Counts	Frequency Counts of C"BRC2"	Frequency Counts of C"BRC2"	Frequency Counts of C"BRC2"	Normalize to [0, 1] of "Relative Frequency"
0.01	0.02	5	5	4.88878e-05	0.000338066
0.03	0.04	6	11	5.86654e-05	0.000422583
0.05	0.06	16	27	0.000156441	0.00126775
0.07	0.08	8	35	7.82205e-05	0.000591616
0.09	0.1	5	40	4.88878e-05	0.000338066
0.11	0.12	10	50	9.77756e-05	0.000760649
0.13	0.14	8	58	7.82205e-05	0.000591616
0.15	0.16	9	67	8.7998e-05	0.000676133
0.17	0.18	2	69	1.95551e-05	8.45166e-05
0.19	0.2	1	70	9.77756e-06	0
0.21	0.22	5	75	4.88878e-05	0.000338066
0.23	0.24	1	76	9.77756e-06	0
0.25	0.26	2	78	1.95551e-05	8.45166e-05
0.27	0.28	3	81	2.93327e-05	0.000169033
0.29	0.3	1	82	9.77756e-06	0
0.31	0.32	5	87	4.88878e-05	0.000338066
0.33	0.34	3	90	2.93327e-05	0.000169033
0.35	0.36	6	96	5.86654e-05	0.000422583
0.37	0.38	10	106	9.77756e-05	0.000760649
0.39	0.4	19	125	0.000185774	0.0015213
0.41	0.42	27	152	0.000263994	0.00219743
0.43	0.44	45	197	0.00043999	0.00371873
0.45	0.46	73	270	0.000713762	0.00608519
0.47	0.48	133	403	0.00130042	0.0111562
0.49	0.5	246	649	0.00240528	0.0207066
0.51	0.52	432	1081	0.00422391	0.0364266
0.53	0.54	632	1713	0.00617942	0.05333
0.55	0.56	1174	2887	0.0114789	0.0991379
0.57	0.58	1868	4755	0.0182645	0.157792
0.59	0.6	3058	7813	0.0298998	0.258367
0.61	0.62	4549	12362	0.0444781	0.384381
0.63	0.64	6534	18896	0.0638866	0.552147
0.65	0.66	8748	27644	0.0855341	0.739266
0.67	0.68	10509	38153	0.102752	0.8881
0.69	0.7	11833	49986	0.115698	1
0.71	0.72	11811	61797	0.115483	0.998141
0.73	0.74	11098	72895	0.108511	0.93788
0.75	0.76	9250	82145	0.0904424	0.781694
0.77	0.78	7104	89249	0.0694598	0.600321
0.79	0.8	4934	94183	0.0482425	0.41692
0.81	0.82	3132	97315	0.0306233	0.264621
0.83	0.84	2022	99337	0.0197702	0.170808
0.85	0.86	1203	100540	0.0117624	0.101589
0.87	0.88	736	101276	0.00719628	0.0621197
0.89	0.9	428	101704	0.0041848	0.0360886
0.91	0.92	253	101957	0.00247372	0.0212982
0.93	0.94	143	102100	0.00139819	0.0120014
0.95	0.96	93	102193	0.000909313	0.00777552
0.97	0.98	54	102247	0.000527988	0.00447938
0.99	1	28	102275	0.000273772	0.00228195

## Sheet: 20 nM BRC2S1221P
Bin Center	Bin End	Count	Cumulative Count	Relative Frequency	Normalized1
Frequency Counts	Frequency Counts	Frequency Counts of C	Frequency Counts of C	Frequency Counts of C	Normalize to [0, 1] of "Relative Frequency"
0.01	0.02	3	3	1.49874e-05	0
0.03	0.04	3	6	1.49874e-05	0
0.05	0.06	4	10	1.99832e-05	3.86503e-05
0.07	0.08	8	18	3.99664e-05	0.000193252
0.09	0.1	13	31	6.49454e-05	0.000386503
0.11	0.12	10	41	4.9958e-05	0.000270552
0.13	0.14	12	53	5.99496e-05	0.000347853
0.15	0.16	7	60	3.49706e-05	0.000154601
0.17	0.18	4	64	1.99832e-05	3.86503e-05
0.19	0.2	5	69	2.4979e-05	7.73007e-05
0.21	0.22	3	72	1.49874e-05	0
0.23	0.24	4	76	1.99832e-05	3.86503e-05
0.25	0.26	4	80	1.99832e-05	3.86503e-05
0.27	0.28	3	83	1.49874e-05	0
0.29	0.3	6	89	2.99748e-05	0.000115951
0.31	0.32	6	95	2.99748e-05	0.000115951
0.33	0.34	3	98	1.49874e-05	0
0.35	0.36	5	103	2.4979e-05	7.73007e-05
0.37	0.38	14	117	6.99412e-05	0.000425154
0.39	0.4	17	134	8.49287e-05	0.000541105
0.41	0.42	25	159	0.000124895	0.000850307
0.43	0.44	37	196	0.000184845	0.00131411
0.45	0.46	84	280	0.000419647	0.00313068
0.47	0.48	179	459	0.000894249	0.00680246
0.49	0.5	300	759	0.00149874	0.0114791
0.51	0.52	529	1288	0.00264278	0.0203301
0.53	0.54	955	2243	0.00477099	0.0367951
0.55	0.56	1555	3798	0.00776847	0.0599853
0.57	0.58	2788	6586	0.0139283	0.107641
0.59	0.6	4622	11208	0.0230906	0.178526
0.61	0.62	7763	18971	0.0387824	0.299927
0.63	0.64	11679	30650	0.058346	0.451281
0.65	0.66	16692	47342	0.08339	0.645035
0.67	0.68	21528	68870	0.10755	0.831948
0.69	0.7	24862	93732	0.124206	0.960809
0.71	0.72	25876	119608	0.129271	1
0.73	0.74	23582	143190	0.117811	0.911336
0.75	0.76	19082	162272	0.0953299	0.73741
0.77	0.78	13835	176107	0.0691169	0.534611
0.79	0.8	9438	185545	0.0471504	0.364666
0.81	0.82	6160	191705	0.0307741	0.23797
0.83	0.84	3717	195422	0.0185694	0.143547
0.85	0.86	2048	197470	0.0102314	0.0790399
0.87	0.88	1243	198713	0.00620978	0.0479264
0.89	0.9	718	199431	0.00358699	0.027635
0.91	0.92	357	199788	0.0017835	0.0136822
0.93	0.94	183	199971	0.000914232	0.00695706
0.95	0.96	105	200076	0.000524559	0.00394233
0.97	0.98	51	200127	0.000254786	0.00185522
0.99	1	41	200168	0.000204828	0.00146871

## Sheet: 20 nM BRC7WT
Bin Center	Bin End	Count	Cumulative Count	Relative Frequency	Normalized1
Frequency Counts	Frequency Counts	Frequency Counts of F"BRC7"	Frequency Counts of F"BRC7"	Frequency Counts of F"BRC7"	Normalize to [0, 1] of "Relative Frequency"
0.01	0.02	6	6	5.0749e-05	0.000370892
0.03	0.04	11	17	9.30398e-05	0.000741785
0.05	0.06	20	37	0.000169163	0.00140939
0.07	0.08	12	49	0.000101498	0.000815963
0.09	0.1	11	60	9.30398e-05	0.000741785
0.11	0.12	16	76	0.000135331	0.00111268
0.13	0.14	16	92	0.000135331	0.00111268
0.15	0.16	12	104	0.000101498	0.000815963
0.17	0.18	7	111	5.92071e-05	0.000445071
0.19	0.2	4	115	3.38326e-05	0.000222535
0.21	0.22	6	121	5.0749e-05	0.000370892
0.23	0.24	1	122	8.45816e-06	0
0.25	0.26	2	124	1.69163e-05	7.41785e-05
0.27	0.28	4	128	3.38326e-05	0.000222535
0.29	0.3	2	130	1.69163e-05	7.41785e-05
0.31	0.32	3	133	2.53745e-05	0.000148357
0.33	0.34	4	137	3.38326e-05	0.000222535
0.35	0.36	6	143	5.0749e-05	0.000370892
0.37	0.38	9	152	7.61235e-05	0.000593428
0.39	0.4	18	170	0.000152247	0.00126103
0.41	0.42	35	205	0.000296036	0.00252207
0.43	0.44	59	264	0.000499032	0.00430235
0.45	0.46	83	347	0.000702027	0.00608263
0.47	0.48	152	499	0.00128564	0.0112009
0.49	0.5	267	766	0.00225833	0.0197315
0.51	0.52	456	1222	0.00385692	0.0337512
0.53	0.54	689	1911	0.00582767	0.0510348
0.55	0.56	1211	3122	0.0102428	0.089756
0.57	0.58	1923	5045	0.016265	0.142571
0.59	0.6	3115	8160	0.0263472	0.230992
0.61	0.62	4654	12814	0.0393643	0.345152
0.63	0.64	6828	19642	0.0577523	0.506416
0.65	0.66	9226	28868	0.078035	0.684296
0.67	0.68	11367	40235	0.0961439	0.843113
0.69	0.7	13191	53426	0.111572	0.978414
0.71	0.72	13482	66908	0.114033	1
0.73	0.74	13194	80102	0.111597	0.978637
0.75	0.76	11267	91369	0.0952981	0.835695
0.77	0.78	8933	100302	0.0755568	0.662562
0.79	0.8	6427	106729	0.0543606	0.476671
0.81	0.82	4264	110993	0.0360656	0.316223
0.83	0.84	2819	113812	0.0238436	0.209035
0.85	0.86	1777	115589	0.0150302	0.131741
0.87	0.88	1097	116686	0.0092786	0.0812996
0.89	0.9	670	117356	0.00566697	0.0496254
0.91	0.92	392	117748	0.0033156	0.0290038
0.93	0.94	211	117959	0.00178467	0.0155775
0.95	0.96	145	118104	0.00122643	0.0106817
0.97	0.98	84	118188	0.000710486	0.00615681
0.99	1	41	118229	0.000346785	0.00296714

## Sheet: 20 nM BRC7T1980I
Bin Center	Bin End	Count	Cumulative Count	Relative Frequency	Normalized1
Frequency Counts	Frequency Counts	Frequency Counts of D	Frequency Counts of D	Frequency Counts of D	Normalize to [0, 1] of "Relative Frequency"
0.01	0.02	1	1	1.93294e-06	0
0.03	0.04	5	6	9.66471e-06	6.48267e-05
0.05	0.06	6	12	1.15977e-05	8.10333e-05
0.07	0.08	8	20	1.54635e-05	0.000113447
0.09	0.1	8	28	1.54635e-05	0.000113447
0.11	0.12	6	34	1.15977e-05	8.10333e-05
0.13	0.14	10	44	1.93294e-05	0.00014586
0.15	0.16	8	52	1.54635e-05	0.000113447
0.17	0.18	6	58	1.15977e-05	8.10333e-05
0.19	0.2	4	62	7.73177e-06	4.862e-05
0.21	0.22	6	68	1.15977e-05	8.10333e-05
0.23	0.24	5	73	9.66471e-06	6.48267e-05
0.25	0.26	5	78	9.66471e-06	6.48267e-05
0.27	0.28	11	89	2.12624e-05	0.000162067
0.29	0.3	23	112	4.44577e-05	0.000356547
0.31	0.32	34	146	6.572e-05	0.00053482
0.33	0.34	31	177	5.99212e-05	0.0004862
0.35	0.36	58	235	0.000112111	0.00092378
0.37	0.38	87	322	0.000168166	0.00139377
0.39	0.4	143	465	0.000276411	0.00230135
0.41	0.42	183	648	0.000353728	0.00294961
0.43	0.44	267	915	0.000516096	0.00431097
0.45	0.46	408	1323	0.00078864	0.00659611
0.47	0.48	707	2030	0.00136659	0.0114419
0.49	0.5	1163	3193	0.00224801	0.0188321
0.51	0.52	2084	5277	0.00402825	0.0337585
0.53	0.54	3502	8779	0.00676916	0.0567395
0.55	0.56	5742	14521	0.011099	0.0930425
0.57	0.58	9377	23898	0.0181252	0.151954
0.59	0.6	14849	38747	0.0287023	0.240637
0.61	0.62	22591	61338	0.0436671	0.366109
0.63	0.64	31888	93226	0.0616377	0.516782
0.65	0.66	42992	136218	0.0831011	0.696741
0.67	0.68	53483	189701	0.10338	0.866765
0.69	0.7	60808	250509	0.117538	0.985479
0.71	0.72	61704	312213	0.11927	1
0.73	0.74	57152	369365	0.110472	0.926227
0.75	0.76	47643	417008	0.0920912	0.772118
0.77	0.78	36285	453293	0.0701368	0.588043
0.79	0.8	24751	478044	0.0478423	0.401115
0.81	0.82	16047	494091	0.0310179	0.260052
0.83	0.84	9733	503824	0.0188133	0.157723
0.85	0.86	5819	509643	0.0112478	0.0942904
0.87	0.88	3390	513033	0.00655267	0.0549244
0.89	0.9	1862	514895	0.00359914	0.0301606
0.91	0.92	1090	515985	0.00210691	0.0176491
0.93	0.94	652	516637	0.00126028	0.0105505
0.95	0.96	380	517017	0.000734518	0.00614233
0.97	0.98	200	517217	0.000386588	0.00322513
0.99	1	129	517346	0.00024935	0.00207445

## Sheet: 400 nM RAD51
Bin Center	Bin End	Count	Cumulative Count	Relative Frequency	Normalized1
Frequency Counts	Frequency Counts	Frequency Counts of D"FRET"	Frequency Counts of D"FRET"	Frequency Counts of D"FRET"	Normalize to [0, 1] of "Relative Frequency"
0.01	0.02	1429	1429	0.014804	0.0233096
0.03	0.04	1943	3372	0.0201289	0.0318069
0.05	0.06	2614	5986	0.0270802	0.128997
0.07	0.08	3271	9257	0.0338865	0.23761
0.09	0.1	3415	12672	0.0353783	0.361415
0.11	0.12	3325	15997	0.034446	0.446537
0.13	0.14	3434	19431	0.0355752	0.564556
0.15	0.16	3673	23104	0.0380511	0.604067
0.17	0.18	3906	27010	0.0404649	0.642586
0.19	0.2	4180	31190	0.0433035	0.687882
0.21	0.22	4648	35838	0.0481518	0.76525
0.23	0.24	5058	40896	0.0523993	0.83303
0.25	0.26	5432	46328	0.0562738	0.894859
0.27	0.28	5934	52262	0.0614744	0.977848
0.29	0.3	6068	58330	0.0628626	1
0.31	0.32	5864	64194	0.0607492	0.966275
0.33	0.34	5393	69587	0.0558698	0.888411
0.35	0.36	4923	74510	0.0510007	0.810713
0.37	0.38	4131	78641	0.0427959	0.679782
0.39	0.4	3491	82132	0.0361657	0.573979
0.41	0.42	2921	85053	0.0302606	0.479749
0.43	0.44	2453	87506	0.0254123	0.402381
0.45	0.46	1990	89496	0.0206158	0.325839
0.47	0.48	1454	90950	0.015063	0.237229
0.49	0.5	1216	92166	0.0125974	0.197884
0.51	0.52	926	93092	0.00959307	0.149942
0.53	0.54	689	93781	0.00713783	0.110762
0.55	0.56	528	94309	0.00546992	0.0841461
0.57	0.58	399	94708	0.00413352	0.0628203
0.59	0.6	310	95018	0.0032115	0.0481071
0.61	0.62	232	95250	0.00240345	0.0352124
0.63	0.64	204	95454	0.00211338	0.0305836
0.65	0.66	162	95616	0.00167827	0.0236403
0.67	0.68	142	95758	0.00147108	0.0203339
0.69	0.7	117	95875	0.00121208	0.016201
0.71	0.72	99	95974	0.00102561	0.0132253
0.73	0.74	74	96048	0.000766617	0.0190924
0.75	0.76	62	96110	0.000642301	0.00710861
0.77	0.78	55	96165	0.000569783	0.0059514
0.79	0.8	65	96230	0.00067338	0.00760456
0.81	0.82	47	96277	0.000486905	0.00462886
0.83	0.84	36	96313	0.000372949	0.00281038
0.85	0.86	38	96351	0.000393668	0.00314102
0.87	0.88	31	96382	0.00032115	0.0019838
0.89	0.9	31	96413	0.00032115	0.0019838
0.91	0.92	24	96437	0.000248633	0.000826583
0.93	0.94	32	96469	0.00033151	0.00214912
0.95	0.96	20	96489	0.000207194	0.000165317
0.97	0.98	19	96508	0.000196834	0
0.99	1	20	96528	0.000207194	0.000165317
