# Supplementary material for: BRCA2 BRC missense variants disrupt RAD51-dependent DNA repair
Source: eLife journal article supplement (doi:10.7554/elife.79183), 2022-09-13
Supplement: fig5-figsupp2-data1 [file Figure 5-figure supplement 2C-source data8-raw data.xlsx]

## Sheet: DNA only
0	121.333	435.556	0.78212
0.03	119.056	352.833	0.7477
0.06	165.222	356.5	0.68331
0.09	159.389	436.167	0.73237
0.12	148.833	325.611	0.6863
0.15	126.833	421.556	0.76872
0.18	155.056	384.833	0.7128
0.21	88.6111	341.556	0.79401
0.24	78.9444	337.5	0.81043
0.27	115.111	417.389	0.78383
0.3	136.833	362.611	0.72603
0.33	144.778	310.333	0.68188
0.36	108.444	332.5	0.75406
0.39	176.833	372.889	0.67832
0.42	132.722	306.5	0.69782
0.45	98.5556	293.444	0.74858
0.48	156.722	347.444	0.68915
0.51	116.222	357.611	0.75472
0.54	128.389	311.333	0.70802
0.57	112	333.889	0.74882
0.6	132.833	330.056	0.71303
0.63	151.333	474.556	0.75821
0.66	168.167	335.056	0.66582
0.69	136.167	343.444	0.71609
0.72	139.889	332.278	0.70373
0.75	108.944	288.222	0.7257
0.78	172.833	410.5	0.70371
0.81	139.278	376	0.7297
0.84	144.778	427.889	0.74719
0.87	111.333	322.889	0.7436
0.9	142.278	306.556	0.68301
0.93	82.5556	437.833	0.84136
0.96	120.611	324.778	0.7292
0.99	175.889	305.333	0.6345
1.02	128.611	386.611	0.75038
1.05	132.944	317	0.70453
1.08	103.944	346.556	0.76927
1.11	150.5	378.5	0.7155
1.14	140.778	310.111	0.68778
1.17	150.111	328.722	0.68651
1.2	132.778	362.444	0.73188
1.23	134.5	319.889	0.704
1.26	151.278	374.056	0.71203
1.29	161.556	363.667	0.69241
1.32	153.278	298.5	0.66072
1.35	122	318.722	0.72318
1.38	153.833	358.167	0.69954
1.41	128.611	356.056	0.73464
1.44	150.556	416	0.73426
1.47	127.889	347.944	0.73123
1.5	110.5	389.889	0.77917
1.53	127.444	373.333	0.74551
1.56	149.667	375	0.71474
1.59	177	364.5	0.67313
1.62	143.556	330.667	0.69728
1.65	96.6667	360.833	0.78871
1.68	163.611	334.889	0.67179
1.71	124	349.5	0.73812
1.74	103.5	395.111	0.79242
1.77	114	393.5	0.77537
1.8	143.222	314.278	0.68695
1.83	132.611	325.611	0.7106
1.86	166.778	291.056	0.63572
1.89	144.333	375.167	0.72217
1.92	165.944	417.333	0.7155
1.95	162.722	340.778	0.67682
1.98	82.6111	277.611	0.77067
2.01	112.944	352.722	0.75746
2.04	123	380.556	0.75574
2.07	129.778	388.667	0.74968
2.1	124.167	295.556	0.70417
2.13	126.722	303.833	0.70568
2.16	152.444	400.333	0.72422
2.19	103.5	355.389	0.77446
2.22	98.0556	275.833	0.73774
2.25	125.389	389	0.75624
2.28	147.056	350.222	0.70428
2.31	174.333	352	0.66878
2.34	84.1667	336.056	0.79971
2.37	142	357.667	0.71581
2.4	96.8889	387.444	0.79995
2.43	159.778	415.944	0.72247
2.46	104.611	381.222	0.78468
2.49	143.167	315.944	0.68817
2.52	150.389	387.944	0.72064
2.55	127.889	358.333	0.73697
2.58	140.444	382.778	0.73158
2.61	148.444	305.111	0.67271
2.64	162.833	464.556	0.74046
2.67	102.722	368.056	0.7818
2.7	132	376.111	0.74021
2.73	114.5	338.722	0.74736
2.76	169.667	394.5	0.69926
2.79	132.444	265.389	0.66709
2.82	134.833	447.722	0.76855
2.85	115.722	308.222	0.72703
2.88	196	339.889	0.63425
2.91	150.056	331.833	0.68861
2.94	145	462.778	0.76143
2.97	133.111	338.5	0.71775
3	113.833	363.5	0.76152
3.03	134.833	335.278	0.71319
3.06	117.167	298.611	0.7182
3.09	145.333	327.222	0.69245
3.12	99.2222	307.5	0.75604
3.15	123.056	356.278	0.74328
3.18	133.333	368.333	0.73422
3.21	114.833	357.167	0.75671
3.24	117.167	367.611	0.75831
3.27	133.833	297.278	0.68956
3.3	122.611	320.111	0.72305
3.33	129.889	335.833	0.7211
3.36	129.5	369.278	0.74037
3.39	144.667	324.111	0.6914
3.42	176.278	379.611	0.68289
3.45	132.444	396.778	0.74974
3.48	129.667	308.389	0.70399
3.51	174.278	352.556	0.6692
3.54	96.6111	303.167	0.75834
3.57	159.278	333.5	0.67678
3.6	132.833	305.111	0.69669
3.63	108.889	303.889	0.7362
3.66	164.722	406.056	0.71141
3.69	105.444	346.278	0.76657
3.72	139.778	366.556	0.72394
3.75	135.833	391.389	0.74236
3.78	150.833	338.056	0.69148
3.81	181	294.111	0.61904
3.84	118.667	353.444	0.74865
3.87	107.722	318.889	0.74749
3.9	77.3889	343.833	0.81628
3.93	131.056	355	0.73037
3.96	131.556	298	0.69374
3.99	118.056	398.556	0.77148
4.02	143.167	358.667	0.71471
4.05	105.278	417	0.79843
4.08	133.278	367.944	0.73409
4.11	146.389	361.111	0.71155
4.14	132.278	372.333	0.73786
4.17	144.389	376.389	0.72274
4.2	74.9444	388.722	0.83837
4.23	109.611	326.056	0.74841
4.26	138	332.167	0.70649
4.29	146.167	390.833	0.72781
4.32	147.611	341.389	0.69814
4.35	148.722	341.389	0.69655
4.38	109.5	321	0.74564
4.41	125.556	375.722	0.74953
4.44	117.611	339.667	0.7428
4.47	91.8889	346.667	0.79047
4.5	148.222	318.778	0.68261
4.53	97.0556	382.222	0.7975
4.56	134.111	376.611	0.73741
4.59	120.056	391.722	0.76541
4.62	133.5	352.111	0.72509
4.65	149.222	311.167	0.67588
4.68	127.167	312.5	0.71077
4.71	76.1667	358.222	0.82466
4.74	129.778	341.056	0.72437
4.77	163.111	367.167	0.6924
4.8	115.389	391.222	0.77223
4.83	182.111	370.111	0.67022
4.86	128.778	403.111	0.75789
4.89	134.5	328.444	0.70947
4.92	129.778	371.278	0.74099
4.95	146.556	299.833	0.67169
4.98	140.167	414.111	0.74712
5.01	129.944	314.333	0.70752
5.04	138.167	357.667	0.72134
5.07	153.111	383	0.7144
5.1	136.333	373.722	0.73271
5.13	121.222	374.111	0.75527
5.16	148.278	393.722	0.72642
5.19	110.833	331.222	0.74928
5.22	123.889	382.222	0.75521
5.25	164	381.056	0.69911
5.28	90.6111	394.5	0.81322
5.31	124.667	386.222	0.75598
5.34	157.111	351	0.69079
5.37	144.667	308.111	0.68049
5.4	141.222	408.278	0.743
5.43	150.722	266.111	0.63841
5.46	137.833	300.444	0.68551
5.49	127.056	413.056	0.76476
5.52	116.222	324.111	0.73606
5.55	142.778	362.778	0.71758
5.58	109.833	366.333	0.76934
5.61	128.889	379.278	0.74636
5.64	124.167	411.167	0.76806
5.67	130.056	266.611	0.67213
5.7	105.278	322.611	0.75396
5.73	138.944	299.278	0.68294
5.76	111.722	359.333	0.76283
5.79	98.3889	369.167	0.78957
5.82	119.444	351.5	0.74637
5.85	166.056	378.056	0.69481
5.88	153.833	299.222	0.66045
5.91	215.944	323.944	0.60002
5.94	151.222	313.278	0.67444
5.97	130.5	381.667	0.7452
6	150.167	415.444	0.73451
6.03	144.222	405.611	0.7377
6.06	110.389	372.222	0.77127
6.09	125.222	346.778	0.7347
6.12	153.944	310.5	0.66854
6.15	145.167	289.944	0.66637
6.18	133.389	350.5	0.72434
6.21	118.778	394.889	0.76876
6.24	158.722	349.333	0.68759
6.27	121.889	376.778	0.75557
6.3	82.7222	329.667	0.79941
6.33	123.222	387.389	0.75868
6.36	133.111	392.111	0.74656
6.39	112.778	384.722	0.77331
6.42	127.444	345.833	0.73072
6.45	162.778	281.444	0.63357
6.48	138.333	365.222	0.72529
6.51	176	363.389	0.6737
6.54	91.9444	273.111	0.74814
6.57	162.611	375.944	0.69806
6.6	121.167	317.833	0.72399
6.63	145.278	447.111	0.75476
6.66	141.778	402.222	0.73938
6.69	119.111	355.444	0.749
6.72	137.556	361.778	0.72452
6.75	174.111	354.167	0.67042
6.78	128.222	366.889	0.74102
6.81	141.444	339.444	0.70587
6.84	132.444	369.722	0.73625
6.87	138.833	354.556	0.71861
6.9	142.111	364.778	0.71964
6.93	102.556	370.111	0.78303
6.96	159.333	288.056	0.64386
6.99	128.222	271.833	0.67949
7.02	98	420.111	0.81085
7.05	115.056	349.944	0.75257
7.08	119.167	382.222	0.76233
7.11	83.8889	438.778	0.8395
7.14	109.722	361.833	0.76732
7.17	120.556	373.5	0.75599
7.2	127.889	377.222	0.74681
7.23	115.889	327	0.73833
7.26	114.889	313.5	0.73181
7.29	97.1111	343.556	0.77963
7.32	161.278	388.167	0.70647
7.35	101.667	336.833	0.76815
7.38	148.722	430.056	0.74304
7.41	145.611	316.278	0.68475
7.44	102.444	305.889	0.74912
7.47	104.278	336.889	0.76363
7.5	87.3333	458.722	0.84007
7.53	130.833	377.167	0.74245
7.56	157.056	317.389	0.66897
7.59	129.222	337.278	0.723
7.62	143	290.667	0.67025
7.65	131.222	326.167	0.71311
7.68	166.333	297.056	0.64105
7.71	123.333	406	0.767
7.74	160.778	355.111	0.68835
7.77	117.056	331.833	0.73923
7.8	125.778	434.333	0.77544
7.83	114.278	350.556	0.75415
7.86	173.333	363.778	0.67729
7.89	157.556	418.667	0.72657
7.92	146.222	338.444	0.6983
7.95	107.5	361.722	0.7709
7.98	147.778	315.222	0.68083
8.01	114.222	352.778	0.75541
8.04	144.889	309.056	0.68082
8.07	124.056	279.944	0.69293
8.1	76.7222	402	0.83974
8.13	127.111	390.111	0.75424
8.16	137.389	336.778	0.71025
8.19	123.5	301.833	0.70964
8.22	137.667	364.056	0.72561
8.25	102.389	408.444	0.79956
8.28	132.833	296.944	0.69093
8.31	124.556	336.833	0.73004
8.34	150.944	424.333	0.73761
8.37	135.722	344.111	0.71715
8.4	143.333	416.111	0.74379
8.43	79.3333	383.556	0.82861
8.46	110.778	351.5	0.76037
8.49	107.944	339.111	0.75854
8.52	111.333	366.056	0.76679
8.55	167.278	371.778	0.68968
8.58	138.778	286.556	0.67372
8.61	90.3333	380.333	0.80807
8.64	87.2222	386.556	0.8159
8.67	139.167	372.611	0.72807
8.7	136.889	343.944	0.71531
8.73	131.889	339.333	0.72011
8.76	150.5	371.056	0.71144
8.79	173.389	260.111	0.60003
8.82	107.611	374.333	0.77671
8.85	111.944	389.5	0.77676
8.88	153.333	384.333	0.71482
8.91	185.722	336	0.64402
8.94	96.8889	367.167	0.79121
8.97	64.2778	365.556	0.85046
9	130.833	393.056	0.75027
9.03	118.278	383.667	0.76436
9.06	167.556	324.944	0.65979
9.09	77.2778	366.167	0.82573
9.12	60	348.889	0.85326
9.15	149.278	410.389	0.73327
9.18	113.944	377.611	0.7682
9.21	143.5	324.611	0.69345
9.24	154.833	368.278	0.70401
9.27	141.722	372.222	0.72425
9.3	158	361.889	0.69609
9.33	155.5	390.667	0.71529
9.36	102.667	408.056	0.79898
9.39	125.556	392.389	0.75759
9.42	106.444	374.444	0.77865
9.45	142.278	353.222	0.71286
9.48	152.056	345.056	0.69412
9.51	129.167	340.722	0.72511
9.54	96.2778	369.444	0.79327
9.57	114.056	384.667	0.7713
9.6	110.556	415.611	0.78988
9.63	150.833	363.722	0.70687
9.66	112.944	308.667	0.73211
9.69	114.889	353.833	0.75489
9.72	100.389	375	0.78883
9.75	159.167	364	0.69576
9.78	79.3333	300	0.79086
9.81	152.722	377.667	0.71206
9.84	140.389	320.833	0.69562
9.87	127.778	277.444	0.68467
9.9	121.556	366.278	0.75083
9.93	126.556	363.111	0.74155
9.96	134.444	343.389	0.71864
9.99	149.389	325.333	0.68531
10.02	125.556	325.444	0.72161
10.05	127.5	392.333	0.75473
10.08	121.222	304.5	0.71526
10.11	109.056	345.444	0.76005
10.14	121.889	316.556	0.722
10.17	160.056	332.333	0.67494
10.2	145.056	383.056	0.72533
10.23	101.111	387.889	0.79323
10.26	120.944	324.667	0.72859
10.29	139.889	342.667	0.71011
10.32	141.778	387.222	0.73199
10.35	84.6667	339.222	0.80026
10.38	100.167	308.667	0.75499
10.41	124.5	338.667	0.7312
10.44	92.5	301.222	0.76506
10.47	156.444	338.556	0.68395
10.5	124.333	319.611	0.71993
10.53	139.222	252.722	0.64479
10.56	167.889	454.722	0.73035
10.59	69.5	369.778	0.84179
10.62	136.222	366.222	0.72888
10.65	148	372.056	0.71542
10.68	104.722	356.833	0.77311
10.71	121.833	361.056	0.7477
10.74	168.611	369.111	0.68643
10.77	142.5	392.5	0.73364
10.8	95	362.778	0.79248
10.83	110	310.944	0.73868
10.86	100.611	330.444	0.76659
10.89	108.667	372.111	0.77398
10.92	92.2222	350.667	0.79177
10.95	110.222	358.056	0.76462
10.98	127.333	353.889	0.7354
11.01	106.833	421.611	0.79783
11.04	115.778	366.722	0.76005
11.07	74.5556	331.444	0.81637
11.1	155.167	371.167	0.70519
11.13	118.278	342.389	0.74325
11.16	98.1111	350.278	0.78119
11.19	162.333	360.833	0.68971
11.22	107.333	408.944	0.7921
11.25	88.9444	333	0.7892
11.28	142.056	395.944	0.73596
11.31	116.667	320.111	0.73289
11.34	112.111	293.778	0.72379
11.37	88.7222	300.389	0.77199
11.4	132	347.889	0.72494
11.43	98.6111	324.556	0.76697
11.46	118.278	372.389	0.75894
11.49	94.5	326.222	0.77539
11.52	152	327.556	0.68304
11.55	94.6111	418	0.81543
11.58	145.389	352.833	0.70818
11.61	109.667	317.556	0.7433
11.64	144.444	373.167	0.72094
11.67	128.778	334.444	0.722
11.7	106.722	372.778	0.77743
11.73	166.833	295.556	0.63919
11.76	112.722	373.889	0.76835
11.79	141.222	379.667	0.72888
11.82	97.3889	355.833	0.78512
11.85	114.389	296.444	0.72157
11.88	82.8333	350.333	0.80877
11.91	126.389	334.889	0.726
11.94	149.722	330.111	0.68797
11.97	117.722	376.722	0.76191
12	114.444	399.111	0.77715
12.03	131.611	334.056	0.71737
12.06	125.333	267.944	0.68131
12.09	155.611	398.611	0.71923
12.12	105.722	382.056	0.78326
12.15	158.389	336.333	0.67984
12.18	91.0556	278.944	0.7539
12.21	123.611	339.333	0.73299
12.24	151.333	315.5	0.67583
12.27	151.111	307.167	0.67026
12.3	102.444	344.111	0.77059
12.33	133.056	401.278	0.75099
12.36	99.7222	305	0.7536
12.39	147.278	313.056	0.68006
12.42	106.056	488.833	0.82172
12.45	104.444	398.5	0.79233
12.48	157.389	341.5	0.68452
12.51	153.222	341.111	0.69004
12.54	113.833	374.333	0.76681
12.57	101.167	345.722	0.77362
12.6	162.667	332.444	0.67145
12.63	94.8889	327.111	0.77514
12.66	117.944	301.167	0.71858
12.69	170.167	383	0.69238
12.72	116.444	400.667	0.77482
12.75	149.389	303.389	0.67006
12.78	117.111	356.556	0.75276
12.81	126.667	350.556	0.73458
12.84	116	355.944	0.75421
12.87	124.5	300	0.70671
12.9	88.8333	399.889	0.81823
12.93	126.611	359.278	0.73942
12.96	129.5	408.944	0.75949
12.99	97.7222	385	0.79756
13.02	117	286	0.70968
13.05	125.944	407.111	0.76373
13.08	143	336.222	0.7016
13.11	145.778	376.444	0.72085
13.14	118.667	363.722	0.754
13.17	91.3889	341.333	0.7888
13.2	122.389	376.833	0.75484
13.23	105.722	341.333	0.76351
13.26	129.222	301.611	0.70006
13.29	108.444	320.167	0.74699
13.32	135.333	347.167	0.71952
13.35	99.1111	312.167	0.75902
13.38	95.6667	364.611	0.79215
13.41	124.5	334.056	0.7285
13.44	139.278	357.833	0.71983
13.47	98.2778	328.278	0.7696
13.5	139.444	328.167	0.70179
13.53	113	313.278	0.73491
13.56	137	365.778	0.72751
13.59	88.0556	316.167	0.78216
13.62	103.056	383.278	0.7881
13.65	97.6667	293.278	0.75018
13.68	170.222	329.778	0.65956
13.71	150.722	363.556	0.70692
13.74	159	308.389	0.65981
13.77	154.611	354.222	0.69615
13.8	200.333	318.222	0.61367
13.83	89.1667	419.778	0.8248
13.86	145.667	374.611	0.72002
13.89	161.722	352.167	0.6853
13.92	135.778	410.667	0.75153
13.95	135.222	352.389	0.72268
13.98	120.222	393.889	0.76616
14.01	143.333	282.889	0.66371
14.04	128.556	319.889	0.71333
14.07	128.333	392.5	0.7536
14.1	106.333	365.611	0.77469
14.13	122.889	362	0.74656
14.16	112.889	342.167	0.75192
14.19	135.5	396.111	0.74511
14.22	137.778	306.278	0.68973
14.25	109.444	358	0.76587
14.28	121.5	318.5	0.72386
14.31	178.556	369.944	0.67447
14.34	144.556	311	0.68268
14.37	152.278	304.167	0.66638
14.4	139.778	397.556	0.73987
14.43	108.444	334.944	0.75542
14.46	157.556	384.556	0.70937
14.49	181.778	365.5	0.66785
14.52	117.611	455.722	0.79486
14.55	128.056	396.056	0.75567
14.58	126.167	409.722	0.76457
14.61	75.1667	302.833	0.80115
14.64	117.111	367.556	0.75837
14.67	116.611	269.167	0.69772
14.7	130.167	325.056	0.71406
14.73	110.722	372.444	0.77084
14.76	105.667	378.833	0.78191
14.79	120.889	301.5	0.7138
14.82	103.833	400.833	0.79425
14.85	135.778	328.278	0.70741
14.88	135.778	370.611	0.73187
14.91	122.389	308.444	0.71593
14.94	88.9444	362.889	0.80315
14.97	116.222	387.556	0.7693

## Sheet: BRC Storage Buffer
0	101.167	237.611	0.70138
0.03	138.722	194.944	0.58425
0.06	82.2222	233.556	0.73962
0.09	155.556	269.5	0.63403
0.12	108.278	221.167	0.67133
0.15	113	173.778	0.60597
0.18	95	289	0.7526
0.21	89.1667	168.556	0.65402
0.24	74.4444	281.167	0.79066
0.27	72.1111	236	0.76596
0.3	68.8333	217.944	0.75998
0.33	127.333	221.611	0.63509
0.36	109.389	185.889	0.62954
0.39	141	146	0.50871
0.42	75.8889	161.167	0.67987
0.45	59.7222	244.889	0.80394
0.48	59.0556	188.5	0.76145
0.51	81.1111	265.111	0.76573
0.54	99.3889	220.556	0.68936
0.57	101.222	213.889	0.67877
0.6	76.8889	205.778	0.72799
0.63	100.833	190.333	0.65369
0.66	117.944	253.222	0.68223
0.69	109.667	156	0.5872
0.72	102.944	167	0.61865
0.75	59.2222	244	0.80469
0.78	99.9444	199.056	0.66574
0.81	122.5	226	0.64849
0.84	80	197.167	0.71137
0.87	103.556	213.056	0.67293
0.9	88.2222	233.389	0.72569
0.93	125.222	179.556	0.58914
0.96	109.444	228.222	0.67588
0.99	89.1667	118.833	0.57131
1.02	58.8889	235.611	0.80004
1.05	90.1111	239.389	0.72652
1.08	86.5	158.278	0.64662
1.11	130.167	225.389	0.63391
1.14	104.5	188.278	0.64307
1.17	123.667	250.111	0.66914
1.2	89	199.778	0.6918
1.23	110.722	183	0.62304
1.26	96.5	191.5	0.66493
1.29	84.1111	237.056	0.73811
1.32	97.3333	230.167	0.7028
1.35	151.667	192.556	0.55939
1.38	97.1667	222.889	0.69641
1.41	127.056	207.889	0.62067
1.44	92.5	234	0.71669
1.47	106.722	195.889	0.64733
1.5	84.6667	229.611	0.7306
1.53	86.9444	197.611	0.69446
1.56	132.278	206.778	0.60986
1.59	89.6111	231.833	0.72122
1.62	79.5556	222.944	0.73701
1.65	61.3889	244.556	0.79935
1.68	73.7222	211.222	0.74128
1.71	119.667	195.889	0.62077
1.74	109.167	190.556	0.63577
1.77	114.5	296.167	0.72119
1.8	125.056	219.167	0.6367
1.83	83.6667	192.056	0.69655
1.86	108.667	186.944	0.6324
1.89	124.222	238.444	0.65748
1.92	83.8333	146.778	0.63647
1.95	102	203.833	0.66649
1.98	114.444	177.333	0.60777
2.01	114	255.611	0.69157
2.04	110.944	155.611	0.58378
2.07	126.111	252.889	0.66725
2.1	87.2778	213.944	0.71025
2.13	140.444	233.722	0.62465
2.16	114.611	218.222	0.65565
2.19	110.833	277.778	0.7148
2.22	66.3333	157.944	0.70424
2.25	123.778	197.278	0.61447
2.28	88.3333	235.944	0.7276
2.31	86.0556	262.778	0.7533
2.34	97.2778	172.5	0.63942
2.37	109.889	247.722	0.69271
2.4	82.5	232.667	0.73823
2.43	100.722	141.056	0.58341
2.46	89.4444	163.333	0.64615
2.49	105	225.778	0.68257
2.52	84.5556	219.833	0.72221
2.55	111.333	190.833	0.63155
2.58	108.222	245.556	0.6941
2.61	87.8889	139.556	0.61358
2.64	95.4444	224.333	0.70153
2.67	81.9444	266.722	0.76498
2.7	138.944	171.778	0.55283
2.73	81.8889	243.944	0.74868
2.76	152.611	156.056	0.50558
2.79	94.6667	207.333	0.68653
2.82	133.389	268.944	0.66846
2.85	115.444	179.833	0.60903
2.88	143.944	211.056	0.59452
2.91	108.5	216.167	0.66581
2.94	114.444	210.778	0.6481
2.97	129.556	240.278	0.64969
3	107.611	240.056	0.69048
3.03	115.056	164.667	0.58868
3.06	102.167	222.167	0.68499
3.09	73.2222	181.111	0.7121
3.12	83.8889	155.222	0.64916
3.15	96.8889	222.667	0.6968
3.18	85.6111	265.056	0.75586
3.21	76.9444	206.111	0.72816
3.24	102.833	183.556	0.64093
3.27	65.2778	160.222	0.71052
3.3	139.5	178	0.56063
3.33	113.778	206.778	0.64506
3.36	83.7222	169.056	0.66879
3.39	88.7778	242.778	0.73224
3.42	128.167	182.944	0.58804
3.45	115.389	226.944	0.66293
3.48	114.556	208.944	0.64589
3.51	95.1111	177.278	0.65083
3.54	62.4444	193.778	0.75629
3.57	110.833	204.833	0.64889
3.6	117.556	249.556	0.67978
3.63	98.5556	179	0.64492
3.66	102.5	218.278	0.68046
3.69	109.667	189.778	0.63377
3.72	146.889	178.944	0.54919
3.75	102.444	244.667	0.70487
3.78	95	220.278	0.69868
3.81	85.6667	192.111	0.6916
3.84	127.222	215.333	0.62861
3.87	86.7778	264.833	0.7532
3.9	89.8333	218.167	0.70833
3.93	105.389	240.056	0.69492
3.96	95.6111	215.556	0.69273
3.99	132.722	231.389	0.63549
4.02	85.0556	230.889	0.73079
4.05	114.889	183.5	0.61497
4.08	67.7778	182.889	0.72961
4.11	109.333	223.222	0.67123
4.14	102.167	185.389	0.64471
4.17	117.389	213	0.64469
4.2	100.056	148	0.59664
4.23	115.889	210.222	0.64463
4.26	119.111	222.611	0.65144
4.29	72.1111	259.5	0.78254
4.32	150.667	279.056	0.64939
4.35	114.778	154.556	0.57384
4.38	107.5	237.5	0.68841
4.41	119.778	193.556	0.61773
4.44	82.4444	142.444	0.6334
4.47	96.1667	192.444	0.6668
4.5	96.1667	268.278	0.73613
4.53	100.944	209.5	0.67484
4.56	55.9444	195.722	0.7777
4.59	104.167	215.833	0.67448
4.62	77.1111	225.444	0.74513
4.65	72.2222	194.111	0.72883
4.68	138.667	203.333	0.59454
4.71	105.444	211.056	0.66684
4.74	95.5556	175.333	0.64725
4.77	85.6667	205.5	0.70578
4.8	66.1667	197.056	0.74863
4.83	137.889	125.167	0.47582
4.86	130.056	207.667	0.6149
4.89	108	211.5	0.66197
4.92	62.5	225.333	0.78286
4.95	119.389	218.056	0.6462
4.98	130.222	190.222	0.59362
5.01	101.333	185.278	0.64644
5.04	129.667	229	0.63848
5.07	121.333	174.389	0.58971
5.1	75.6111	264.167	0.77747
5.13	107.5	168.667	0.61074
5.16	116.278	252.833	0.68498
5.19	85.7222	246.833	0.74223
5.22	108.611	234.389	0.68335
5.25	93.2222	162.333	0.63522
5.28	77.2222	156.444	0.66952
5.31	105	181.444	0.63344
5.34	100.722	179.778	0.64092
5.37	103.444	227.333	0.68727
5.4	116.611	217.944	0.65144
5.43	85.3889	247.556	0.74353
5.46	94.2778	259.056	0.73318
5.49	107.611	155.5	0.59101
5.52	97.5	224.722	0.69741
5.55	105.778	238.611	0.69285
5.58	92.2778	211	0.69573
5.61	64.8333	227.889	0.77852
5.64	107.722	210	0.66095
5.67	90.7222	219.111	0.70719
5.7	77.1667	224.889	0.74453
5.73	86.3333	221.333	0.71939
5.76	105.222	254.056	0.70713
5.79	119.833	243.722	0.67039
5.82	113.722	174.611	0.60559
5.85	106.667	264.722	0.71279
5.88	115.5	223.333	0.65912
5.91	94.7778	201.889	0.68052
5.94	101.556	161	0.6132
5.97	107.667	193.444	0.64244
6	84.1667	215.167	0.71882
6.03	123.167	222.889	0.64408
6.06	55.5	200.278	0.78301
6.09	106.444	286.556	0.72915
6.12	104.889	183.111	0.6358
6.15	102.611	238.5	0.69919
6.18	116.778	216.889	0.65002
6.21	92.1667	181	0.6626
6.24	178.556	241.889	0.57532
6.27	111.444	263	0.70237
6.3	78.1667	178.556	0.69552
6.33	137.222	233	0.62935
6.36	123.778	187.722	0.60264
6.39	118.722	268.722	0.69358
6.42	69.8889	178.611	0.71876
6.45	76.2778	183.444	0.70631
6.48	115.278	182.611	0.61302
6.51	110.278	224.056	0.67016
6.54	89.3333	255.333	0.74081
6.57	96.7222	191.5	0.66442
6.6	69.6111	284.611	0.80348
6.63	110.611	225.889	0.67129
6.66	49.3889	206.889	0.80728
6.69	141.222	213.111	0.60144
6.72	118.222	184.944	0.61004
6.75	108.167	221.944	0.67233
6.78	110.5	219.444	0.6651
6.81	101.333	247.5	0.70951
6.84	145.833	255.778	0.63688
6.87	103.333	256.167	0.71256
6.9	69.4444	243.944	0.77841
6.93	91.1111	156.389	0.63187
6.96	92	240.444	0.72326
6.99	93.3333	147.444	0.61237
7.02	108.444	150.444	0.58112
7.05	78.7222	172.111	0.68616
7.08	103.833	284.944	0.73292
7.11	84.6111	138.389	0.62058
7.14	80.2778	214.333	0.72751
7.17	107	246.889	0.69765
7.2	117.889	253.722	0.68276
7.23	100.833	172.611	0.63125
7.26	67.5	272.667	0.80157
7.29	95.8333	116.611	0.5489
7.32	117.5	204.389	0.63497
7.35	143.5	236.444	0.62231
7.38	82.1111	223.333	0.73117
7.41	93.4444	254	0.73105
7.44	78.1111	261.5	0.77
7.47	134.056	261.278	0.66091
7.5	97.1111	236.111	0.70857
7.53	96.7222	242.056	0.7145
7.56	77.2222	258.056	0.76968
7.59	93.2222	231.5	0.71292
7.62	98.2778	286.889	0.74484
7.65	57.6111	266.444	0.82222
7.68	115.444	226.167	0.66206
7.71	156.556	170.833	0.52181
7.74	103.278	206	0.66607
7.77	121.944	220.333	0.64373
7.8	106.944	217.833	0.67072
7.83	129.167	184.556	0.58828
7.86	100.722	184.444	0.6468
7.89	93.5556	214.667	0.69647
7.92	90.8333	220.667	0.7084
7.95	84.5	244.944	0.74351
7.98	107.833	206.389	0.65682
8.01	127.5	202.111	0.61318
8.04	46.6667	196.167	0.80782
8.07	80.4444	221.778	0.73382
8.1	134.444	240.833	0.64175
8.13	110.611	228.889	0.67419
8.16	105.222	273.833	0.72241
8.19	111.389	222.556	0.66644
8.22	110.389	162.611	0.59565
8.25	118.556	198.778	0.6264
8.28	114.556	273.444	0.70475
8.31	108.778	199.111	0.6467
8.34	91.1667	225.278	0.7119
8.37	66.7778	184.5	0.73425
8.4	122.056	238.722	0.66169
8.43	148.333	254	0.63132
8.46	101.889	249.444	0.70999
8.49	94.1667	172.833	0.64732
8.52	65.2222	190.611	0.74506
8.55	133.056	186.444	0.58355
8.58	74.3333	195.333	0.72435
8.61	152.889	252.444	0.62281
8.64	86.0556	236.722	0.73339
8.67	108.167	165.167	0.60427
8.7	70	212.222	0.75197
8.73	48.5	218.556	0.81839
8.76	57.6667	279.167	0.8288
8.79	83.1111	228.111	0.73295
8.82	63.6111	210.556	0.76798
8.85	116.611	202.278	0.63432
8.88	123.056	237.389	0.6586
8.91	104.5	247.111	0.7028
8.94	96	227.333	0.70309
8.97	114.667	255.833	0.69051
9	117.944	193.056	0.62076
9.03	101.389	248.833	0.7105
9.06	93.4444	151	0.61773
9.09	173.611	168.222	0.49212
9.12	88.8333	205.222	0.6979
9.15	123.722	227	0.64724
9.18	147.389	251.778	0.63076
9.21	108.556	208.556	0.65767
9.24	131.056	220.833	0.62757
9.27	143.222	195.556	0.57724
9.3	89.6111	172.667	0.65834
9.33	88.3889	194.389	0.68743
9.36	122.556	248.389	0.66961
9.39	122.167	181.444	0.59762
9.42	133.444	269.667	0.66896
9.45	126.778	172.833	0.57686
9.48	123.944	185.389	0.59932
9.51	71.5	162.889	0.69495
9.54	92.1111	271.5	0.74668
9.57	75.6111	217.667	0.74219
9.6	96.8889	233.889	0.70709
9.63	111.778	166	0.5976
9.66	122.167	252.722	0.67413
9.69	99.2778	155	0.60957
9.72	52.7222	169.222	0.76245
9.75	81	175.778	0.68455
9.78	108.444	220.111	0.66994
9.81	96.3889	218.278	0.69368
9.84	158.944	229.167	0.59047
9.87	140.167	288.667	0.67314
9.9	97.2778	170.889	0.63725
9.93	131.333	168.444	0.5619
9.96	98.5	225.611	0.69609
9.99	124.333	277.333	0.69046
10.02	109.389	294.722	0.72931
10.05	105	253.389	0.70702
10.08	97.1667	193.056	0.6652
10.11	123.389	206.222	0.62565
10.14	87.7222	223.333	0.71799
10.17	79.5556	198.556	0.71394
10.2	79.6667	200.833	0.71598
10.23	131	160.556	0.55069
10.26	126.222	148.167	0.53999
10.29	139.722	253.778	0.64492
10.32	128.5	223.333	0.63477
10.35	88.7222	175.889	0.66471
10.38	78.5	261.167	0.76889
10.41	97.6111	158.111	0.61829
10.44	75.8333	201.667	0.72673
10.47	100	133.056	0.57092
10.5	118.889	179.389	0.60142
10.53	177.444	189.556	0.5165
10.56	91.1111	241.111	0.72575
10.59	139.5	236.444	0.62893
10.62	90.5	203.611	0.69229
10.65	91.3333	225.056	0.71133
10.68	85.3889	183.667	0.68263
10.71	82.9444	188.556	0.6945
10.74	79.7222	262.667	0.76716
10.77	86.7222	230.833	0.72691
10.8	75.1667	187.333	0.71365
10.83	83.1667	188.889	0.6943
10.86	81.1667	179.778	0.68895
10.89	127.389	211.944	0.62459
10.92	95.5556	254.222	0.72681
10.95	126.056	240.778	0.65637
10.98	116.944	211.556	0.644
11.01	119.889	216.833	0.64395
11.04	130.667	210.111	0.61656
11.07	134.389	184.833	0.57901
11.1	133.389	215.278	0.61743
11.13	86.5556	176.889	0.67145
11.16	73.4444	202.778	0.73411
11.19	152.389	243.222	0.6148
11.22	87.2222	245.444	0.73781
11.25	67.2778	245.889	0.78517
11.28	85.0556	189.5	0.69021
11.31	96.5556	192.556	0.66603
11.34	129.944	243.222	0.65178
11.37	92.4444	122.111	0.56914
11.4	104.056	190.833	0.64714
11.43	91.1111	241.778	0.7263
11.46	59.3889	224.778	0.79101
11.49	133.167	254.333	0.65634
11.52	124	277.944	0.6915
11.55	70	192.833	0.73367
11.58	79.1667	245.333	0.75603
11.61	85.1111	185.333	0.68529
11.64	126.611	178.944	0.58564
11.67	133.056	202.333	0.60328
11.7	89.3333	179.722	0.66797
11.73	116.333	231.222	0.66528
11.76	98.9444	206.167	0.67571
11.79	105.056	204.278	0.66038
11.82	110.278	192.333	0.63558
11.85	77.3889	223.333	0.74266
11.88	82.5556	181.889	0.68782
11.91	95.0556	166.056	0.63596
11.94	156.333	228.667	0.59394
11.97	82.4444	201.944	0.7101
12	111.667	215.389	0.65857
12.03	141.5	197.389	0.58246
12.06	104.778	191.444	0.64629
12.09	98.1667	169.278	0.63295
12.12	106.5	197.278	0.64941
12.15	118.444	213.944	0.64366
12.18	75.8333	217.722	0.74167
12.21	87.3333	234.222	0.7284
12.24	81.2778	245.667	0.7514
12.27	85.9444	221.056	0.72005
12.3	86.2222	185.111	0.68223
12.33	92.1667	223	0.70756
12.36	115.556	238.333	0.67347
12.39	76.0556	259.111	0.77308
12.42	90.9444	188.889	0.675
12.45	91.6111	198.278	0.68398
12.48	79.4444	259.167	0.76538
12.51	114.833	211.333	0.64793
12.54	76.8333	218.556	0.73989
12.57	71.5556	227.944	0.76108
12.6	109.833	219.056	0.66605
12.63	92.7778	190.444	0.67242
12.66	123.444	180.278	0.59356
12.69	122.611	228.944	0.65123
12.72	139.111	246.222	0.63899
12.75	94.1111	143.833	0.60448
12.78	124.222	244.222	0.66285
12.81	113	191.389	0.62876
12.84	140	228.889	0.62048
12.87	121.889	187.833	0.60646
12.9	119.611	200.722	0.6266
12.93	60	265.056	0.81542
12.96	97.3889	161.722	0.62414
12.99	135.389	229.611	0.62907
13.02	125.833	198.611	0.61216
13.05	111.444	209.722	0.653
13.08	101.167	293.722	0.74381
13.11	71	190.944	0.72895
13.14	95.6111	192.944	0.66866
13.17	74.4444	245.444	0.76728
13.2	98.7778	148.056	0.59982
13.23	129.667	188.833	0.59288
13.26	80.5556	242.167	0.75039
13.29	112.444	238.444	0.67954
13.32	97.3889	267.833	0.73334
13.35	159.667	245.111	0.60554
13.38	89.5556	254.389	0.73962
13.41	82.2222	174.556	0.67979
13.44	120.778	254	0.67773
13.47	104.944	174.944	0.62505
13.5	99.4444	194.833	0.66207
13.53	100.167	193.556	0.65897
13.56	115.111	231.889	0.66827
13.59	122.722	271.389	0.68861
13.62	105.722	168.278	0.61415
13.65	74.1111	192.333	0.72185
13.68	97.6667	176.889	0.64427
13.71	150.222	172.667	0.53476
13.74	111.389	157.778	0.58617
13.77	100.444	184.556	0.64756
13.8	92.6667	209.944	0.69378
13.83	68	249.667	0.78594
13.86	100.778	250.556	0.71316
13.89	81.5	187.611	0.69715
13.92	131.444	168.556	0.56185
13.95	105.333	187.167	0.63989
13.98	110.222	196.5	0.64064
14.01	110.889	213	0.65763
14.04	86.1111	206.111	0.70532
14.07	115.167	219.222	0.65559
14.1	117.611	203.111	0.63329
14.13	119.944	263.611	0.68728
14.16	126.667	191.056	0.60133
14.19	151.389	243.5	0.61663
14.22	82.0556	194.778	0.70359
14.25	102.556	239.944	0.70057
14.28	122	209.722	0.63222
14.31	103.889	243.944	0.70133
14.34	136.222	197.611	0.59195
14.37	75.1111	244	0.76462
14.4	54	165.278	0.75374
14.43	99.6111	285.556	0.74138
14.46	91.6111	174.278	0.65545
14.49	67.6111	231.5	0.77396
14.52	69.9444	179.5	0.7196
14.55	117.944	149.444	0.5589
14.58	44.3333	210.278	0.82588
14.61	125.778	228.444	0.64492
14.64	100.5	203.333	0.66923
14.67	105.167	235.389	0.69119
14.7	67	229.611	0.77412
14.73	100.722	193.056	0.65715
14.76	105.611	261.278	0.71214
14.79	129.167	226.944	0.63729
14.82	91.3889	241.444	0.72542
14.85	114.889	263.944	0.69673
14.88	75	245.889	0.76627
14.91	92.3889	191.056	0.67405
14.94	103.111	155.333	0.60103
14.97	106.889	145	0.57565

## Sheet: 20 nM BRC2WT
0	89.0556	253.278	0.73986
0.03	108.5	209.833	0.65916
0.06	107.111	237.222	0.68893
0.09	56.7222	267.167	0.82487
0.12	109.056	195.333	0.64172
0.15	89.8889	197.833	0.68758
0.18	86.8889	237.889	0.73247
0.21	104.389	181.333	0.63465
0.24	122.056	204.444	0.62617
0.27	97.2222	234.611	0.70701
0.3	87.5556	209.611	0.70537
0.33	116.333	169.167	0.59253
0.36	99.9444	221.278	0.68886
0.39	133.444	209.833	0.61126
0.42	119.056	227.611	0.65657
0.45	124.833	231.278	0.64945
0.48	71.8889	229.278	0.7613
0.51	88.4444	223.278	0.71627
0.54	117.222	177.333	0.60204
0.57	105.111	293.056	0.73601
0.6	70.3889	257.333	0.78522
0.63	102.333	214.889	0.67741
0.66	107.111	171.222	0.61517
0.69	78.3333	274.722	0.77813
0.72	77.5556	213	0.73308
0.75	121.167	208.722	0.6327
0.78	91.1111	202.667	0.68986
0.81	90.0556	202.5	0.69218
0.84	110	219	0.66565
0.87	61.8333	227.111	0.786
0.9	111.722	242.833	0.6849
0.93	119.833	214.556	0.64163
0.96	131.167	247.944	0.65402
0.99	141.222	230.833	0.62043
1.02	113.056	218.833	0.65936
1.05	128.778	239.944	0.65075
1.08	130.222	231.944	0.64044
1.11	81.3889	198.333	0.70904
1.14	107.389	229.278	0.68102
1.17	60.5556	200.167	0.76774
1.2	65.5	256.778	0.79676
1.23	112.333	225.611	0.6676
1.26	96.3889	211.5	0.68694
1.29	95.2222	268.278	0.73804
1.32	64.7222	233.944	0.7833
1.35	94.0556	193.833	0.67329
1.38	85.5	270.444	0.75979
1.41	101.278	210.222	0.67487
1.44	81.5	186	0.69533
1.47	109.278	240.333	0.68743
1.5	129.778	222.833	0.63195
1.53	121.667	164.333	0.57459
1.56	75.9444	223.778	0.74662
1.59	115.722	225.167	0.66053
1.62	95.7222	213.444	0.69039
1.65	119.333	235.444	0.66364
1.68	116.556	199.167	0.63083
1.71	60.0556	200.278	0.76931
1.74	91.7222	225.333	0.71071
1.77	149.167	202.5	0.57583
1.8	134.778	262.222	0.66051
1.83	93.7222	203.556	0.68473
1.86	113.556	170.611	0.60039
1.89	113.167	232.444	0.67256
1.92	147.611	216.444	0.59454
1.95	85.1667	186.056	0.68599
1.98	162.722	215.833	0.57015
2.01	63.8333	195.5	0.75386
2.04	110.278	186.944	0.62897
2.07	143.222	206.5	0.59047
2.1	111.722	236.444	0.67911
2.13	90	223.833	0.71322
2.16	99.2778	209	0.67796
2.19	79.6667	161.278	0.66936
2.22	87.4444	170.111	0.66048
2.25	112.833	207.667	0.64795
2.28	80.1111	211.222	0.72502
2.31	124.444	205.944	0.62334
2.34	75.3889	194.389	0.72055
2.37	85.5556	252.833	0.74717
2.4	99.3333	268.056	0.72962
2.43	130.722	253.5	0.65977
2.46	117.167	267	0.69501
2.49	79.1667	205.778	0.72217
2.52	105.389	286.778	0.73127
2.55	100.722	221.333	0.68725
2.58	88.0556	156.5	0.63994
2.61	87.7222	210.444	0.70579
2.64	127.778	219.278	0.63182
2.67	112.833	268.833	0.70437
2.7	79.1111	214.556	0.73061
2.73	60.1111	212.5	0.7795
2.76	100.889	220.556	0.68614
2.79	97.1667	225.167	0.69855
2.82	104.722	263.278	0.71543
2.85	94.1111	223.722	0.7039
2.88	110.333	242.333	0.68715
2.91	48.7778	185.833	0.79209
2.94	106	201.333	0.6551
2.97	146	241.278	0.62301
3	132.556	234.722	0.63909
3.03	131.333	220.889	0.62713
3.06	123.611	192.389	0.60883
3.09	126.056	199.389	0.61267
3.12	103.444	217.611	0.6778
3.15	78.8333	241.611	0.75399
3.18	81.2778	222.778	0.73269
3.21	76.8333	237.167	0.75531
3.24	84.2778	188.556	0.6911
3.27	97.4444	175.278	0.6427
3.3	47.6667	197.944	0.80593
3.33	80.2222	227.778	0.73954
3.36	107.833	242.611	0.6923
3.39	135.722	197.667	0.5929
3.42	55.8333	272.333	0.82986
3.45	124.778	202.167	0.61835
3.48	58.8333	195.222	0.76842
3.51	120.611	224.167	0.65018
3.54	149.944	178.778	0.54386
3.57	139.833	218.389	0.60965
3.6	113.778	242.278	0.68045
3.63	103.889	203.167	0.66166
3.66	80.3889	268.222	0.7694
3.69	99.6111	170.444	0.63115
3.72	78	275.667	0.77945
3.75	96.3333	184.889	0.65745
3.78	80.0556	200.111	0.71426
3.81	149.611	204	0.5769
3.84	121.722	209.333	0.63232
3.87	115.278	188.722	0.6208
3.9	45.9444	244.722	0.84193
3.93	119.611	251.167	0.6774
3.96	96.3889	211.167	0.6866
3.99	123.5	265.333	0.68238
4.02	75.4444	189.944	0.71572
4.05	97.6667	231.556	0.70334
4.08	107.278	201.167	0.6522
4.11	71	232.5	0.76606
4.14	83.1111	190	0.69569
4.17	121.444	168.222	0.58074
4.2	65.8333	205.111	0.75702
4.23	112.056	255.556	0.69518
4.26	120.5	202.722	0.62719
4.29	91.0556	195.444	0.68218
4.32	71.8333	167.611	0.7
4.35	88.6111	244.889	0.7343
4.38	70.6111	201.389	0.7404
4.41	86.0556	213.722	0.71294
4.44	88.7222	229.056	0.7208
4.47	75.6111	171.611	0.69416
4.5	138.722	204.556	0.59589
4.53	110.278	196.5	0.64053
4.56	93.7222	237.889	0.71737
4.59	113.5	185.556	0.62047
4.62	120.333	206.167	0.63144
4.65	110.278	213.611	0.65952
4.68	37.1111	242.722	0.86738
4.71	115.222	144.333	0.55608
4.74	97.1111	194	0.66641
4.77	86	246.833	0.74161
4.8	125.889	223.889	0.64009
4.83	115.778	189.833	0.62116
4.86	118.167	140.889	0.54386
4.89	108.722	234.444	0.68318
4.92	93.0556	198.611	0.68095
4.95	97.1111	243.056	0.71452
4.98	114	223.667	0.66239
5.01	103.056	224.889	0.68575
5.04	87.2222	237.778	0.73162
5.07	66.3889	227.944	0.77444
5.1	145.944	242.111	0.62391
5.13	100.333	270.333	0.72932
5.16	120.5	170.222	0.58552
5.19	98.1111	184.056	0.65229
5.22	117.111	216.222	0.64867
5.25	102.667	182.611	0.64012
5.28	82.6111	191.444	0.69856
5.31	77.5556	256.389	0.76776
5.34	69.5556	284.056	0.8033
5.37	108.222	196.722	0.64511
5.4	91.7222	229.611	0.71456
5.43	44.4444	258.611	0.85335
5.46	106.167	245.667	0.69825
5.49	80.6667	213.5	0.72578
5.52	146.778	204.111	0.5817
5.55	85	234.556	0.73401
5.58	117.056	237.833	0.67016
5.61	65.1111	237.056	0.78452
5.64	97.7778	234.167	0.70544
5.67	104.333	149.222	0.58852
5.7	86.8889	165.444	0.65566
5.73	99.5	248.722	0.71426
5.76	73.3889	213.5	0.74419
5.79	67.9444	184.389	0.73074
5.82	56.9444	208.833	0.78574
5.85	159.167	166.5	0.51126
5.88	59.8333	216.889	0.78378
5.91	109.444	239.278	0.68616
5.94	119.333	189.167	0.61318
5.97	129.167	190.278	0.59565
6	107.833	167.5	0.60835
6.03	94.6111	199.611	0.67844
6.06	95.6111	245.833	0.71998
6.09	77.8333	190.444	0.70988
6.12	96.6111	224.222	0.69887
6.15	80.6111	236.111	0.74548
6.18	94.6667	227.222	0.7059
6.21	106.222	235.778	0.68941
6.24	119.278	220	0.64844
6.27	126.889	207.833	0.62091
6.3	102.944	192.667	0.65176
6.33	120.111	255.778	0.68046
6.36	96.3333	213.833	0.68941
6.39	78.9444	231.278	0.74552
6.42	90.6667	214.444	0.70284
6.45	97.4444	217.278	0.69038
6.48	103	243.5	0.70274
6.51	97.2222	187.556	0.6586
6.54	71.3333	196.278	0.73344
6.57	65.8333	192.389	0.74505
6.6	75.1667	280.889	0.78889
6.63	106.944	187.444	0.63672
6.66	87.8889	268.778	0.75358
6.69	93.6667	257.944	0.73361
6.72	145.167	171.667	0.54182
6.75	130.222	279.611	0.68226
6.78	101.556	177.056	0.63549
6.81	79.3889	169.667	0.68124
6.84	100.5	259.556	0.72088
6.87	84.5556	188.111	0.68989
6.9	93.1667	202.389	0.68477
6.93	89.5556	166.833	0.6507
6.96	128.444	231.778	0.64343
6.99	99.9444	221.444	0.68902
7.02	132.833	197.111	0.59741
7.05	87	205.111	0.70217
7.08	118.722	249.667	0.67773
7.11	70.1111	183.778	0.72385
7.14	88.4444	220.889	0.71408
7.17	92.2778	197.444	0.6815
7.2	118.944	162.056	0.57671
7.23	125.833	206.5	0.62136
7.26	120.667	239.5	0.66497
7.29	99.3333	163.722	0.62239
7.32	58.7222	246.389	0.80754
7.35	92.8333	167.056	0.6428
7.38	116.278	203.444	0.63632
7.41	122.222	195.222	0.61498
7.44	107.889	207.389	0.6578
7.47	110.556	181.778	0.62182
7.5	83.7778	229.278	0.73239
7.53	84.2778	156.889	0.65054
7.56	130.778	251	0.65745
7.59	104.167	183.389	0.63775
7.62	71.2778	184.556	0.72139
7.65	120.667	231.333	0.6572
7.68	104.778	231.444	0.68837
7.71	108.5	200.278	0.64861
7.74	50.4444	206	0.80329
7.77	124.056	197.444	0.61414
7.8	107.667	272.056	0.71646
7.83	95.8333	222.222	0.69869
7.86	110.389	222.778	0.66867
7.89	113.444	203.833	0.64244
7.92	110.833	219.833	0.66482
7.95	58.3889	217.389	0.78828
7.98	149.333	209.056	0.58332
8.01	118.056	210.389	0.64056
8.04	80.2222	271.667	0.77202
8.07	123.889	242.667	0.66202
8.1	151.778	212.5	0.58335
8.13	95.1667	188.222	0.66418
8.16	89.5	146.111	0.62014
8.19	129.556	275.667	0.68029
8.22	117.278	239.111	0.67093
8.25	137.111	226.444	0.62286
8.28	80.8333	161.111	0.6659
8.31	80.7778	190.056	0.70174
8.34	82.2222	207.389	0.71609
8.37	76	253.833	0.76958
8.4	106.333	217	0.67113
8.43	59	179.667	0.75279
8.46	114.833	214.667	0.65149
8.49	74.3889	255.167	0.77428
8.52	122.333	191.389	0.61006
8.55	106.833	216.111	0.66919
8.58	98.5556	244.167	0.71243
8.61	91.7222	181.611	0.66443
8.64	92.9444	145.833	0.61075
8.67	89.5556	210.167	0.7012
8.7	74.1667	195.444	0.72491
8.73	139.056	188.833	0.57591
8.76	75.3889	235.389	0.75742
8.79	116.056	241.333	0.67527
8.82	113.667	214.389	0.65351
8.85	83.6111	256.778	0.75437
8.88	114.222	174.667	0.60462
8.91	97.3889	295.333	0.75202
8.94	88.4444	177.667	0.66764
8.97	134.278	240.444	0.64166
9	99.7222	251.444	0.71603
9.03	99	182.5	0.64831
9.06	110.222	201.222	0.64609
9.09	77.8889	201.722	0.72144
9.12	120.778	181.056	0.59985
9.15	69.7778	201.833	0.7431
9.18	113.944	204.778	0.6425
9.21	19	276.278	0.93565
9.24	68.8889	215.5	0.75777
9.27	84.8889	218.333	0.72004
9.3	94.3889	213.556	0.69349
9.33	90.2778	239.778	0.72648
9.36	76.2222	242.889	0.76114
9.39	88.5	233.778	0.72539
9.42	128	235.167	0.64754
9.45	94.0556	279.167	0.74799
9.48	98.3333	225.056	0.69593
9.51	80.5556	225.222	0.73656
9.54	103.611	201.667	0.6606
9.57	91.3333	209.722	0.69662
9.6	100.389	209.5	0.67605
9.63	102.944	222.111	0.6833
9.66	62.3333	233.444	0.78926
9.69	126.222	206.444	0.62057
9.72	119.278	262.556	0.68762
9.75	84.2778	180.667	0.6819
9.78	69.5556	186.167	0.728
9.81	138.056	239.5	0.63434
9.84	90.8333	195.611	0.68289
9.87	80.8889	202.444	0.71451
9.9	112.278	198.5	0.63872
9.93	104.611	282.167	0.72953
9.96	89.0556	270.833	0.75255
9.99	77.0556	200.278	0.72216
10.02	64.7222	234.556	0.78374
10.05	121.5	220.944	0.6452
10.08	101.333	230.556	0.69468
10.11	116.222	161.722	0.58185
10.14	76.2222	209.833	0.73354
10.17	93.4444	201.222	0.68288
10.2	98.5	212.5	0.68328
10.23	93.1111	230.667	0.71242
10.26	79.3333	262.111	0.76765
10.29	84.2222	203.167	0.70694
10.32	87.1667	185.278	0.68006
10.35	88.6667	215.722	0.70871
10.38	81.8889	203.444	0.71301
10.41	131.167	202.056	0.60637
10.44	100.444	203.389	0.66941
10.47	57.1667	216	0.79073
10.5	116.556	217.389	0.65097
10.53	125	218.5	0.6361
10.56	125.778	205.667	0.62052
10.59	102.889	185.056	0.64268
10.62	149.944	266.056	0.63956
10.65	74.0556	224.556	0.752
10.68	127.667	186.944	0.59421
10.71	117	176.5	0.60136
10.74	107.722	176.056	0.6204
10.77	109.333	247.167	0.69331
10.8	97.6667	215.722	0.68835
10.83	144.611	219.333	0.60266
10.86	146.944	172.611	0.54016
10.89	68.1667	220.111	0.76354
10.92	94.6111	218.444	0.69778
10.95	158.833	208.278	0.56734
10.98	78.2778	282	0.78273
11.01	148.778	213.833	0.5897
11.04	82.5556	180.278	0.6859
11.07	110.222	178.5	0.61824
11.1	97.5556	213.389	0.68626
11.13	90.5	184.778	0.67124
11.16	113.5	190.889	0.62712
11.19	131.611	257.056	0.66138
11.22	99.0556	189.944	0.65725
11.25	97.6111	225.667	0.69806
11.28	108.722	250.389	0.69725
11.31	73.8333	190.333	0.7205
11.34	132.111	249.611	0.65391
11.37	73.5	251.222	0.77365
11.4	72	195.611	0.73095
11.43	74.8889	213.278	0.74012
11.46	149.278	216.333	0.5917
11.49	113	213.444	0.65385
11.52	94.0556	270.111	0.74172
11.55	71.3333	176.056	0.71166
11.58	113.722	225.167	0.66443
11.61	107.722	245	0.6946
11.64	108	214.167	0.66477
11.67	127.056	247.722	0.66098
11.7	119.556	189	0.61253
11.73	87.8333	252.278	0.74175
11.76	130.278	241.278	0.64937
11.79	134.111	221.389	0.62275
11.82	102	235.389	0.69768
11.85	115.389	204.444	0.63922
11.88	86.7778	210.667	0.70826
11.91	108.778	255.722	0.70157
11.94	92.6111	200.556	0.6841
11.97	108.667	217.556	0.66689
12	111.778	209.444	0.65202
12.03	87.4444	216.556	0.71235
12.06	92.4444	239.056	0.72113
12.09	80	178.889	0.69099
12.12	137	197.444	0.59037
12.15	78.3889	176.944	0.69299
12.18	101.778	225.278	0.68881
12.21	122.889	182.222	0.59723
12.24	105.889	160.944	0.60316
12.27	46.1111	211.056	0.8207
12.3	137.111	230.056	0.62657
12.33	98.9444	159.333	0.61691
12.36	69.1111	155.444	0.69223
12.39	98.6111	212.111	0.68264
12.42	104.111	174.056	0.62572
12.45	127.111	271.722	0.68129
12.48	72	227.556	0.75964
12.51	139.389	201.667	0.5913
12.54	111.5	169.611	0.60336
12.57	72.6111	159.833	0.68762
12.6	87.5	253.833	0.74365
12.63	113.056	175.389	0.60805
12.66	82.7778	233.333	0.73814
12.69	85	230.056	0.73021
12.72	75.2778	311	0.80512
12.75	74.6111	182.944	0.71031
12.78	95.8333	234.667	0.71004
12.81	120.167	211.222	0.63738
12.84	114	193.5	0.62927
12.87	86.9444	234.778	0.72975
12.9	105.778	260.111	0.7109
12.93	123.944	210.889	0.62983
12.96	158.444	251.222	0.61324
12.99	62.2222	233.5	0.78959
13.02	119.111	222.611	0.65144
13.05	57.7778	226.167	0.79652
13.08	113.611	187.111	0.62221
13.11	120.222	276.333	0.69683
13.14	76.7222	231.111	0.75077
13.17	72.8889	200.778	0.73366
13.2	119.167	178.556	0.59974
13.23	55.2222	237.889	0.8116
13.26	71.0556	236.833	0.76922
13.29	96.2222	203.278	0.67872
13.32	130.833	211.889	0.61825
13.35	44.3889	256.944	0.85269
13.38	141.667	230.111	0.61895
13.41	49	221.111	0.81859
13.44	73.2778	236.556	0.76349
13.47	94.0556	200.889	0.68111
13.5	91.5	228.278	0.71386
13.53	113.278	218.667	0.65874
13.56	79.1111	211.167	0.72746
13.59	112.167	225.333	0.66765
13.62	111.5	284.611	0.71851
13.65	125.333	226.167	0.64343
13.68	63.4444	236.778	0.78868
13.71	101.611	205.889	0.66956
13.74	74.0556	184.222	0.71327
13.77	104.778	205.722	0.66255
13.8	71.5	171.889	0.70623
13.83	83.5	222.833	0.72742
13.86	75.3889	198.944	0.72519
13.89	98.3889	270.111	0.733
13.92	90.5	188.833	0.67601
13.95	68.4444	190.222	0.7354
13.98	110.556	203.111	0.64754
14.01	111.722	215.333	0.6584
14.04	95.1111	209.778	0.68805
14.07	83.8333	225.889	0.72933
14.1	80.0556	211.944	0.72584
14.13	162.278	232.722	0.58917
14.16	89.4444	255.667	0.74082
14.19	101.444	195.111	0.65792
14.22	114	201.5	0.63867
14.25	95.2778	178.333	0.65178
14.28	100.444	192.778	0.65745
14.31	115.333	221.056	0.65714
14.34	71.8889	161.167	0.69154
14.37	90.6111	244.333	0.72947
14.4	80.8889	193.444	0.70514
14.43	85.4444	220.167	0.72041
14.46	84.3333	223.944	0.72644
14.49	171.833	77.2778	0.31021
14.52	235.389	40.0556	0.14542
14.55	213.556	20.3889	0.08715
14.58	266.056	15.5556	0.05524
14.61	240.222	14.7778	0.05795
14.64	278.667	40.1111	0.12583
14.67	292.667	35.6667	0.10863
14.7	232.222	30.1667	0.11497
14.73	246.944	15.1667	0.05786
14.76	274.278	19	0.06478
14.79	215.444	33.3889	0.13418
14.82	207.278	41.4444	0.16663
14.85	217.111	15.4444	0.06641
14.88	217.5	15.2222	0.06541
14.91	211.222	21.4444	0.09217
14.94	265.611	9.27778	0.03375
14.97	244.611	56	0.18629

## Sheet: 20 nM BRC2S1221P
0	174.722	344.556	0.66353
0.03	217.722	348.833	0.61571
0.06	228.833	422.722	0.64879
0.09	152.222	377.944	0.71288
0.12	213.667	361.667	0.62862
0.15	178.111	363.833	0.67135
0.18	219.167	405.667	0.64924
0.21	185.333	321.667	0.63445
0.24	221.389	294.444	0.57081
0.27	180.056	353.444	0.6625
0.3	147.111	340.833	0.69851
0.33	179.611	417	0.69895
0.36	163.389	338.778	0.67463
0.39	217.389	342.556	0.61177
0.42	215.944	379	0.63703
0.45	192.667	343.944	0.64096
0.48	187.5	371.389	0.66451
0.51	176.778	275.778	0.60938
0.54	152.778	369.444	0.70745
0.57	223.167	359.111	0.61674
0.6	188.444	345.944	0.64736
0.63	193.944	367.389	0.65449
0.66	199.056	414.111	0.67536
0.69	236.944	397.389	0.62647
0.72	182.556	346.5	0.65494
0.75	192.611	423.5	0.68738
0.78	202.667	391.056	0.65865
0.81	201	331.056	0.62222
0.84	199.722	389.444	0.66101
0.87	203.833	256.222	0.55694
0.9	178.111	347.667	0.66124
0.93	196.556	359.833	0.64673
0.96	227.556	302.944	0.57105
0.99	173.167	314.389	0.64483
1.02	185.778	272.111	0.59427
1.05	217.778	431.889	0.66479
1.08	235.167	327.111	0.58176
1.11	201.778	352.722	0.63611
1.14	210	313.833	0.59911
1.17	169.722	356.889	0.67771
1.2	239.722	341.333	0.58744
1.23	207.222	403.333	0.6606
1.26	190.556	375.778	0.66353
1.29	212.667	334.5	0.61133
1.32	189.778	386.5	0.67068
1.35	185.111	330.333	0.64087
1.38	206.611	454.611	0.68753
1.41	187.056	393.944	0.67805
1.44	180.056	364.889	0.66959
1.47	190.222	356.833	0.65228
1.5	239.889	408.722	0.63015
1.53	232.444	396.222	0.63026
1.56	253.278	365.889	0.59094
1.59	190.222	357.611	0.65277
1.62	167.167	361.167	0.6836
1.65	161.056	390.056	0.70776
1.68	183.833	443.222	0.70683
1.71	209.056	429.5	0.67261
1.74	217.222	388.333	0.64128
1.77	260.667	306.556	0.54045
1.8	225.611	319	0.58574
1.83	213.333	380.611	0.64082
1.86	188.833	373.389	0.66413
1.89	195.444	349.889	0.64161
1.92	184.778	355.5	0.65799
1.95	155.111	303.5	0.66178
1.98	233.111	343.111	0.59545
2.01	193.389	405.5	0.67709
2.04	177.5	449.667	0.71698
2.07	201.167	389.444	0.65939
2.1	179.111	373.944	0.67614
2.13	196.167	420.167	0.68172
2.16	177.333	341.389	0.65813
2.19	219.222	325.833	0.5978
2.22	246.389	388.278	0.61178
2.25	226.944	404.944	0.64085
2.28	206.278	387.333	0.6525
2.31	174.111	328.667	0.6537
2.34	220.056	347.944	0.61258
2.37	167.556	399.222	0.70437
2.4	205.444	335.889	0.62048
2.43	121.333	347.111	0.74099
2.46	203.611	374.722	0.64793
2.49	201.889	338	0.62605
2.52	167.944	345.611	0.67298
2.55	216.944	325.167	0.59982
2.58	177	304.889	0.6327
2.61	166.667	438.556	0.72462
2.64	217	347.333	0.61548
2.67	224.778	252.111	0.52866
2.7	186.556	342.444	0.64734
2.73	154.889	411.5	0.72653
2.76	167.778	384.722	0.69633
2.79	195.222	306.111	0.61059
2.82	210.5	455.333	0.68385
2.85	232.333	346.611	0.59869
2.88	223.889	388.611	0.63447
2.91	175.167	370.556	0.67902
2.94	196.278	375.278	0.65659
2.97	231.111	397.167	0.63215
3	217.889	409.111	0.65249
3.03	205.944	344.889	0.62612
3.06	213.278	331.5	0.60851
3.09	171.556	370.833	0.6837
3.12	186.611	258.389	0.58065
3.15	205.944	374.389	0.64513
3.18	154.722	365.222	0.70243
3.21	160.444	350.222	0.68581
3.24	206.667	331.222	0.61578
3.27	189.5	348.444	0.64773
3.3	217.111	367.778	0.6288
3.33	176.833	310.278	0.63698
3.36	201.611	283.611	0.5845
3.39	203.889	384.333	0.65338
3.42	268.444	385.556	0.58953
3.45	162.778	401.778	0.71167
3.48	177	356.278	0.66809
3.51	146.944	311.333	0.67936
3.54	185.5	302.611	0.61996
3.57	213.444	396.167	0.64987
3.6	213.889	350.167	0.6208
3.63	201.222	338.667	0.62729
3.66	172.111	366.556	0.68049
3.69	158.333	324	0.67173
3.72	183.167	393.444	0.68234
3.75	230.556	391.278	0.62923
3.78	182.722	357.444	0.66173
3.81	221.167	444.444	0.66772
3.84	187.556	400.833	0.68124
3.87	148.833	309.056	0.67496
3.9	219.5	387.222	0.63822
3.93	252.667	391.611	0.60783
3.96	147.722	329.278	0.69031
3.99	218.944	327.611	0.59941
4.02	242.167	385.611	0.61425
4.05	166.333	363.389	0.686
4.08	181.944	361.056	0.66493
4.11	209.611	359.778	0.63187
4.14	157	343.944	0.68659
4.17	250.222	382.222	0.60436
4.2	195.944	396.389	0.6692
4.23	212.889	447	0.67739
4.26	192.667	312.222	0.6184
4.29	236.944	440.722	0.65035
4.32	197.222	270.444	0.57828
4.35	228.111	357.778	0.61066
4.38	166.556	337.611	0.66964
4.41	235.722	344	0.59339
4.44	207.889	397.611	0.65667
4.47	211.889	351.722	0.62405
4.5	191.556	359.611	0.65245
4.53	245.333	373.944	0.60384
4.56	198.722	340.167	0.63124
4.59	203.444	397.444	0.66143
4.62	172.778	362.056	0.67695
4.65	255.611	332	0.565
4.68	169	312.778	0.64922
4.71	187.5	358.667	0.6567
4.74	272.111	410.5	0.60137
4.77	209.333	358.778	0.63153
4.8	193.778	337.333	0.63515
4.83	182.667	323.056	0.6388
4.86	178.222	308.5	0.63383
4.89	237.722	345.611	0.59248
4.92	201.167	379.5	0.65356
4.95	214.778	384.389	0.64154
4.98	225	328.889	0.59378
5.01	219.722	339.944	0.60741
5.04	145.722	342.444	0.70149
5.07	220.5	381.556	0.63375
5.1	191.111	328.278	0.63205
5.13	216.222	403.222	0.65094
5.16	172.5	362.778	0.67774
5.19	272.056	414.5	0.60374
5.22	204.722	360.944	0.63809
5.25	200.222	398.722	0.66571
5.28	160.667	386.056	0.70613
5.31	142.333	406.056	0.74045
5.34	216.889	379.889	0.63657
5.37	226.167	370.333	0.62084
5.4	175.722	381.944	0.6849
5.43	240.056	360.944	0.60057
5.46	194.944	469.056	0.70641
5.49	180.333	410.111	0.69458
5.52	203.278	349.056	0.63197
5.55	150.389	346.556	0.69737
5.58	167.944	341.389	0.67027
5.61	152.611	348.111	0.69522
5.64	195.056	416.333	0.68096
5.67	226.056	362.5	0.61591
5.7	225.444	334.5	0.59738
5.73	227.556	392.5	0.63301
5.76	192.556	325.111	0.62803
5.79	247.944	391.944	0.61252
5.82	179.667	347.667	0.65929
5.85	201.333	337.278	0.6262
5.88	181.222	390	0.68275
5.91	194.167	329.944	0.62953
5.94	180.333	373	0.6741
5.97	190.722	301.556	0.61257
6	212.333	351.5	0.62341
6.03	204.833	373.444	0.64579
6.06	229	365.556	0.61484
6.09	194.389	435.444	0.69136
6.12	207.722	400.056	0.65823
6.15	233.333	366.889	0.61126
6.18	197.611	389.611	0.66348
6.21	266.111	355.722	0.57205
6.24	244.833	319.222	0.56594
6.27	230.389	278.5	0.54727
6.3	221	326.944	0.59667
6.33	212.056	359.167	0.62877
6.36	265.833	414	0.60897
6.39	211.556	362.222	0.63129
6.42	183	405.667	0.68913
6.45	234.667	352.222	0.60015
6.48	222.5	394.778	0.63955
6.51	181.111	279.222	0.60657
6.54	181.333	331	0.64606
6.57	247.056	381.778	0.60712
6.6	218.444	364.667	0.62538
6.63	230.611	402.556	0.63578
6.66	217.111	372.833	0.63198
6.69	194.389	369.611	0.65534
6.72	230.722	299.944	0.56522
6.75	220.222	407	0.64889
6.78	246.722	385.111	0.60951
6.81	221.111	347.722	0.61129
6.84	223.444	358.111	0.61578
6.87	212.611	340.389	0.61553
6.9	228	291.889	0.56144
6.93	191.111	324.667	0.62947
6.96	217.444	339.722	0.60973
6.99	173.056	376.5	0.6851
7.02	190.944	383.389	0.66754
7.05	214.5	284.556	0.57019
7.08	205.833	276.111	0.57291
7.11	161.778	370.111	0.69584
7.14	185	430.444	0.6994
7.17	191.944	376.278	0.6622
7.2	189.5	336.444	0.6397
7.23	213.389	374.056	0.63675
7.26	226.556	313.444	0.58045
7.29	217.111	401.833	0.64922
7.32	185	435.444	0.70183
7.35	189.111	304.556	0.61693
7.38	168.944	340.833	0.66859
7.41	270.722	336.778	0.55437
7.44	194	324.722	0.626
7.47	181.056	307.222	0.6292
7.5	200.889	287.278	0.58848
7.53	191.222	399.111	0.67608
7.56	197	410.444	0.67569
7.59	225.833	371.778	0.62211
7.62	184.278	385.5	0.67658
7.65	152.222	375.556	0.71158
7.68	201.556	327.5	0.61903
7.71	175.389	398.222	0.69424
7.74	206.111	413.111	0.66715
7.77	198.944	449.111	0.69301
7.8	184.722	366.222	0.66472
7.83	167.444	385	0.6969
7.86	173.889	349.611	0.66783
7.89	203.111	313.444	0.6068
7.92	184.111	284.333	0.60697
7.95	195.278	315.5	0.61769
7.98	254.444	358.778	0.58507
8.01	178.556	400.722	0.69176
8.04	201.444	356.111	0.6387
8.07	169.222	337.389	0.66597
8.1	158.778	357.556	0.69249
8.13	219.167	330.889	0.60156
8.16	177.944	299.167	0.62704
8.19	222.389	331.667	0.59862
8.22	233.444	331.556	0.58682
8.25	192.389	340.722	0.63912
8.28	221.444	372.333	0.62706
8.31	189.056	342.722	0.64448
8.34	223.167	356.333	0.6149
8.37	239.778	320.167	0.57178
8.4	197.444	352.5	0.64097
8.43	226.944	373.222	0.62186
8.46	209.167	309.778	0.59694
8.49	209.778	357.111	0.62995
8.52	149	351.389	0.70223
8.55	177.889	375	0.67826
8.58	242.889	319.667	0.56824
8.61	262.167	349	0.57104
8.64	203.222	382.556	0.65307
8.67	192.278	323.889	0.62749
8.7	169.056	373.278	0.68828
8.73	173.5	340.111	0.6622
8.76	192.611	412.667	0.68178
8.79	195.111	417.944	0.68174
8.82	180.722	305.778	0.62853
8.85	181.778	395.056	0.68487
8.88	147.611	429.5	0.74422
8.91	199.889	411.611	0.67312
8.94	224.778	334.5	0.59809
8.97	207.833	371.5	0.64125
9	187	313.833	0.62662
9.03	194.833	340.889	0.63632
9.06	193.667	367.056	0.65461
9.09	121	368.389	0.75275
9.12	189.722	424.778	0.69126
9.15	155.222	391.833	0.71626
9.18	146.222	360.611	0.7115
9.21	181.667	385.5	0.67969
9.24	155	449.722	0.74368
9.27	257.722	321.111	0.55476
9.3	141.611	302.167	0.6809
9.33	200.444	430.889	0.68251
9.36	209.778	433.222	0.67375
9.39	173	345.389	0.66627
9.42	228.056	335.778	0.59553
9.45	181.278	362.333	0.66653
9.48	194.889	367.111	0.65322
9.51	235	358.444	0.60401
9.54	223.333	422.833	0.65437
9.57	161.611	336	0.67523
9.6	198.167	370.722	0.65166
9.63	192.944	307.778	0.61467
9.66	168.111	290.722	0.63361
9.69	181.611	468.278	0.72055
9.72	255.222	262.722	0.50724
9.75	240.222	387.278	0.61718
9.78	208	347	0.62523
9.81	201.167	317.111	0.61186
9.84	191.722	400.111	0.67605
9.87	187.778	380.944	0.66983
9.9	174.444	309.111	0.63925
9.93	152.556	324.778	0.6804
9.96	208.056	286.833	0.57959
9.99	227.5	338.222	0.59786
10.02	210.778	393.889	0.65141
10.05	209.222	341.444	0.62006
10.08	229.222	447.889	0.66147
10.11	191.667	337.722	0.63795
10.14	200	351.778	0.63754
10.17	226.111	371.889	0.62189
10.2	203.833	318.667	0.60989
10.23	237.944	350.056	0.59533
10.26	205.389	322.389	0.61084
10.29	181.833	344.778	0.65471
10.32	200.389	378.778	0.654
10.35	241.5	382.556	0.61302
10.38	161.611	379.111	0.70112
10.41	222.111	342.889	0.60688
10.44	191.611	360.222	0.65277
10.47	192.333	330.944	0.63245
10.5	235.5	365.278	0.60801
10.53	203.611	400.667	0.66305
10.56	198.056	388.889	0.66257
10.59	223.056	278.111	0.55493
10.62	235.056	341.5	0.59231
10.65	178.167	420.111	0.7022
10.68	156	376.222	0.70689
10.71	256.611	372.278	0.59196
10.74	219.222	344.389	0.61104
10.77	227.722	326.5	0.58911
10.8	210.556	304.222	0.59098
10.83	232.667	392.944	0.6281
10.86	193.056	362.167	0.65229
10.89	239.056	322.667	0.57442
10.92	166.167	390.667	0.70159
10.95	231.389	343.444	0.59747
10.98	259.444	334.778	0.56339
11.01	193.667	294.5	0.60328
11.04	145.722	354.667	0.70878
11.07	184.889	379.111	0.67218
11.1	176.222	383.333	0.68507
11.13	182.167	303.111	0.62461
11.16	200.111	340.722	0.62999
11.19	189.056	416.889	0.688
11.22	203.611	348.722	0.63136
11.25	186.389	487.278	0.72332
11.28	205.667	415.722	0.66902
11.31	185.167	322.5	0.63526
11.34	214.389	414.5	0.6591
11.37	213.778	415.333	0.66019
11.4	199.944	379	0.65464
11.43	202.056	304.722	0.60129
11.46	219.833	251.111	0.53321
11.49	140.167	310.889	0.68925
11.52	172.389	380.611	0.68827
11.55	196.889	302.444	0.6057
11.58	162.833	340.667	0.6766
11.61	192.111	403.111	0.67724
11.64	197.222	315.444	0.6153
11.67	167.889	317.833	0.65435
11.7	215.778	375.111	0.63483
11.73	237.556	357.056	0.60049
11.76	202.722	367.722	0.64462
11.79	174.333	395.5	0.69406
11.82	203.278	320.611	0.61198
11.85	227.889	311.556	0.57755
11.88	191.444	357.889	0.6515
11.91	222.333	347.833	0.61006
11.94	206.611	352.778	0.63065
11.97	216.389	311.056	0.58974
12	176.333	316.556	0.64225
12.03	184.5	425.389	0.69749
12.06	205.222	341.444	0.62459
12.09	166.667	331.778	0.66563
12.12	197	377.611	0.65716
12.15	209.667	335.167	0.61517
12.18	195.833	409.5	0.67649
12.21	142.167	250.889	0.6383
12.24	145.667	360.333	0.71212
12.27	186.889	313.833	0.62676
12.3	199.722	366.222	0.6471
12.33	177.667	363.444	0.67166
12.36	198.667	356.056	0.64186
12.39	191.611	323.944	0.62834
12.42	191.333	424.5	0.68931
12.45	175.333	323.722	0.64867
12.48	146.5	385.278	0.72451
12.51	267	355	0.57074
12.54	176	350.778	0.66589
12.57	173.389	449.333	0.72156
12.6	160	398.667	0.7136
12.63	156	330.222	0.67916
12.66	167.278	359.167	0.68225
12.69	199.833	345.722	0.63371
12.72	190.556	394	0.67402
12.75	190.889	266.056	0.58225
12.78	197.833	326.389	0.62262
12.81	222.556	396.444	0.64046
12.84	192.833	330.667	0.63165
12.87	179.611	416	0.69844
12.9	194.5	298.056	0.60512
12.93	194.722	323.389	0.62417
12.96	209.833	299	0.58762
12.99	199.833	321.278	0.61652
13.02	176.389	362	0.67238
13.05	220.667	321.056	0.59266
13.08	201.222	279.111	0.58108
13.11	173.778	353.611	0.67049
13.14	220.056	338.944	0.60634
13.17	192	289.278	0.60106
13.2	214.833	337.556	0.61108
13.23	188.222	385.667	0.67202
13.26	185.444	349.778	0.65352
13.29	232.222	339	0.59346
13.32	242.833	356.389	0.59475
13.35	223.611	310.667	0.58147
13.38	207	347.056	0.62639
13.41	178.111	350.5	0.66306
13.44	202.278	387.389	0.65696
13.47	186.722	378.167	0.66945
13.5	205.333	438.111	0.68088
13.53	155.5	257.889	0.62384
13.56	200.611	351.778	0.63683
13.59	215.111	319.444	0.59759
13.62	207.778	394.611	0.65508
13.65	203.889	382.056	0.65203
13.68	189.056	386.722	0.67165
13.71	184.278	365.778	0.66498
13.74	226.944	341.667	0.60088
13.77	200.111	330.444	0.62283
13.8	209.5	374	0.64096
13.83	261.167	395.056	0.60201
13.86	184.889	368.833	0.6661
13.89	207.944	345.889	0.62454
13.92	215.556	412.944	0.65703
13.95	235.056	367.611	0.60997
13.98	230.056	380.556	0.62324
14.01	207.056	382.944	0.64906
14.04	177.444	349.833	0.66347
14.07	220.056	375.944	0.63078
14.1	223	346.556	0.60847
14.13	191.944	357.444	0.65062
14.16	215.556	356.778	0.62337
14.19	167.5	438.333	0.72352
14.22	215.111	391.889	0.64562
14.25	162	356.278	0.68743
14.28	245.833	457.722	0.65058
14.31	194.944	358.056	0.64748
14.34	186.389	371.667	0.666
14.37	170.111	366.889	0.68322
14.4	214.389	279.389	0.56582
14.43	226	374.722	0.62379
14.46	162.833	423.333	0.72221
14.49	215.5	359.833	0.62543
14.52	176.167	329.944	0.65192
14.55	169.611	377	0.6897
14.58	212.778	354	0.62458
14.61	181.111	355.722	0.66263
14.64	206.778	390.5	0.6538
14.67	188.333	366.833	0.66076
14.7	227.278	334.778	0.59563
14.73	219.5	318.444	0.59197
14.76	178.278	368.944	0.67421
14.79	188.5	405.222	0.68251
14.82	211.556	381.278	0.64314
14.85	201.5	341.333	0.6288
14.88	174.167	332.667	0.65636
14.91	158.778	394.889	0.71322
14.94	178.667	377	0.67846
14.97	125.333	292.556	0.70008

## Sheet: 20 nM BRC7WT
0	181.667	12.1111	0.0625
0.03	237.778	35.9444	0.13132
0.06	253.778	19.4444	0.07117
0.09	252.111	32.5556	0.11436
0.12	203.222	14.2778	0.06564
0.15	228.944	0.94444	0.00411
0.18	200.778	25.2222	0.1116
0.21	286.167	14.5556	0.0484
0.24	227.278	41.7778	0.15528
0.27	257.222	-19.6667	-0.08279
0.3	214.833	23.5556	0.09881
0.33	195.278	35.1111	0.1524
0.36	210.667	11.8889	0.05342
0.39	222.111	35.7778	0.13873
0.42	222.5	13.0556	0.05542
0.45	257.944	18.7222	0.06767
0.48	267.444	-18.7778	-0.07551
0.51	265.889	29.9444	0.10122
0.54	237.5	11.1111	0.04469
0.57	233.056	12.8333	0.05219
0.6	339	13.2778	0.03769
0.63	197.444	3.55556	0.01769
0.66	187.611	60.7778	0.24469
0.69	190.833	61.8333	0.24472
0.72	215	6.66667	0.03008
0.75	274.222	18.3889	0.06284
0.78	281.167	52.5556	0.15748
0.81	250	39.8889	0.1376
0.84	241	36.8333	0.13257
0.87	223.056	17.3889	0.07232
0.9	272.556	10.1111	0.03577
0.93	247.5	2.38889	0.00956
0.96	192.667	32.3889	0.14392
0.99	241.278	54.7222	0.18487
1.02	250.056	38.4444	0.13326
1.05	198	-36.2778	-0.22432
1.08	208.833	25.5556	0.10903
1.11	169	80.8889	0.3237
1.14	83.1667	202.278	0.70864
1.17	111.667	205.167	0.64755
1.2	75.2222	237.833	0.75972
1.23	114.944	191.389	0.62477
1.26	85.2778	178.611	0.67684
1.29	75.6667	221.833	0.74566
1.32	72.6111	188.222	0.72162
1.35	113.444	195	0.6322
1.38	101.944	239.944	0.70182
1.41	101.333	193.167	0.65591
1.44	67	192.222	0.74153
1.47	66.3333	255.611	0.79396
1.5	57	155.944	0.73232
1.53	65.7222	159.611	0.70833
1.56	116.944	207.778	0.63986
1.59	76.3333	237.222	0.75656
1.62	90.3333	234.444	0.72186
1.65	81.5556	198.556	0.70885
1.68	87.1667	190.833	0.68645
1.71	97.5556	169.944	0.63531
1.74	63.2222	134.556	0.68034
1.77	45.1111	213.778	0.82575
1.8	151.611	264.556	0.6357
1.83	100.5	208.111	0.67435
1.86	89.7222	205.389	0.69597
1.89	117.444	190.667	0.61882
1.92	140.611	164.389	0.53898
1.95	81.0556	185.333	0.69572
1.98	104.222	226.5	0.68486
2.01	48.3889	239.111	0.83169
2.04	126.667	209.222	0.62289
2.07	98.2222	210	0.68133
2.1	96.0556	232.722	0.70784
2.13	102.333	193.444	0.65402
2.16	68.6111	192.056	0.73679
2.19	85.2222	216.111	0.71718
2.22	74.6667	208.611	0.73642
2.25	91.3333	269.5	0.74688
2.28	68.8333	174.667	0.71732
2.31	125.111	202.778	0.61843
2.34	71.9444	188.611	0.72388
2.37	80.1667	230.222	0.74172
2.4	86.1667	236.556	0.733
2.43	55	199.833	0.78417
2.46	76.6111	186.5	0.70883
2.49	70.5556	161.222	0.69559
2.52	87.5556	206.556	0.7023
2.55	89.5	183.222	0.67183
2.58	90.1667	228.5	0.71705
2.61	95.8889	154.556	0.61713
2.64	45.6111	166.444	0.78491
2.67	94.6111	230.111	0.70864
2.7	82.6111	187.833	0.69454
2.73	108.167	261.556	0.70744
2.76	81.7222	232.889	0.74024
2.79	60.6667	230.5	0.79164
2.82	55.4444	200.833	0.78365
2.85	99.1667	234.333	0.70265
2.88	95.3333	238	0.714
2.91	80.7778	197	0.7092
2.94	86.2778	214	0.71267
2.97	103.722	243.611	0.70138
3	77.2778	162.167	0.67726
3.03	80.2222	224.167	0.73645
3.06	78.6111	233.333	0.748
3.09	94.4444	160.278	0.62923
3.12	96.1667	198.944	0.67413
3.15	85.3889	244.667	0.74129
3.18	88.3889	179.778	0.6704
3.21	65.1111	270	0.8057
3.24	109.556	217.056	0.66457
3.27	144.333	176.111	0.54958
3.3	88.1667	259.222	0.7462
3.33	87.8333	188.333	0.68196
3.36	84.9444	205.333	0.70737
3.39	91.1111	232.167	0.71816
3.42	100.833	245.389	0.70876
3.45	74.1667	235.667	0.76062
3.48	116.056	163.444	0.58477
3.51	95.0556	167.889	0.6385
3.54	77.4444	212	0.73244
3.57	86.6111	210.833	0.70882
3.6	78.2778	124.444	0.61387
3.63	78	192.444	0.71159
3.66	66.2778	204	0.75478
3.69	96.5556	124	0.56222
3.72	105.889	214.667	0.66967
3.75	74.1667	244	0.76689
3.78	89.7222	174.333	0.66021
3.81	63.5556	164.333	0.72111
3.84	59.0556	222.833	0.7905
3.87	43.8333	129.167	0.74663
3.9	86.1111	209.111	0.70832
3.93	79.2222	176.556	0.69027
3.96	95.3333	193.278	0.66968
3.99	54.2778	167.556	0.75532
4.02	46.6111	180.722	0.79497
4.05	58.1111	270.111	0.82295
4.08	113.611	200	0.63773
4.11	80.7222	238.389	0.74704
4.14	82.2778	224.556	0.73185
4.17	101.111	161.278	0.61465
4.2	49.9444	170.944	0.77389
4.23	69.5	188.056	0.73016
4.26	64.9444	198.944	0.75389
4.29	62.5556	175.667	0.73741
4.32	93.1111	183.056	0.66284
4.35	64.8333	204.722	0.75948
4.38	136.278	264.444	0.65992
4.41	93.6111	194.222	0.67477
4.44	53.4444	246.778	0.82198
4.47	70.4444	222.5	0.75953
4.5	91.5	155.444	0.62947
4.53	124.611	261.611	0.67736
4.56	108.611	224.667	0.67411
4.59	77.8333	165.111	0.67962
4.62	124.389	189.667	0.60393
4.65	70.4444	231.167	0.76644
4.68	43.8889	154.278	0.77853
4.71	101.611	206.722	0.67045
4.74	74.8889	289.278	0.79436
4.77	79.7778	232.611	0.74462
4.8	80.0556	172.222	0.68267
4.83	82.0556	164.833	0.66764
4.86	109.778	190.167	0.63401
4.89	60.9444	216.5	0.78034
4.92	105.722	170.5	0.61726
4.95	65.6111	144.778	0.68814
4.98	118.222	229.278	0.65979
5.01	85.3333	176.222	0.67375
5.04	66.8333	158.556	0.70348
5.07	86.7778	208.889	0.7065
5.1	80.2222	225.5	0.7376
5.13	101	164.778	0.61998
5.16	76.7222	199.111	0.72185
5.19	88	217	0.71148
5.22	96.6111	214.5	0.68946
5.25	90.3333	173.556	0.65768
5.28	102.111	218.667	0.68168
5.31	85.2222	211.444	0.71273
5.34	75.3889	180.556	0.70545
5.37	101.222	232.722	0.69689
5.4	94.3889	149.611	0.61316
5.43	42.6111	205.667	0.82837
5.46	107.444	212.944	0.66464
5.49	142.167	188.111	0.56955
5.52	59.4444	277.944	0.82381
5.55	104.389	226.667	0.68468
5.58	110.833	142.222	0.56202
5.61	101.278	171.389	0.62857
5.64	87.2222	201.278	0.69767
5.67	74.2222	190.333	0.71945
5.7	101.833	241.667	0.70354
5.73	90.4444	169.667	0.65229
5.76	78.6111	218.278	0.73522
5.79	64.8333	225.278	0.77652
5.82	124	166.444	0.57307
5.85	83.5	170.944	0.67183
5.88	111.278	265.111	0.70435
5.91	114.833	194.444	0.6287
5.94	118.444	222.389	0.65249
5.97	76.3333	212.111	0.73536
6	66.2222	193.667	0.74519
6.03	51.0556	217.444	0.80985
6.06	81.1111	220.833	0.73137
6.09	74.3333	178.222	0.70568
6.12	108.167	231.222	0.68129
6.15	83	198.778	0.70544
6.18	94.8889	201.722	0.68009
6.21	82.8333	201.611	0.70879
6.24	83.0556	225.611	0.73092
6.27	87.3333	150.667	0.63305
6.3	88.5556	235.167	0.72645
6.33	110.056	177.5	0.61727
6.36	80.3333	145.778	0.64472
6.39	115.722	190.667	0.6223
6.42	127.667	170.556	0.57191
6.45	91.1667	224.611	0.71129
6.48	61.3889	173.833	0.73902
6.51	100.111	143.167	0.58849
6.54	113.889	185.333	0.61938
6.57	74.7778	224.833	0.75042
6.6	81.9444	200	0.70936
6.63	46.3333	154.444	0.76923
6.66	76.4444	230.889	0.75127
6.69	110	179.944	0.62062
6.72	116.222	227.667	0.66204
6.75	77.5556	162.278	0.67663
6.78	125.5	254.667	0.66988
6.81	107.278	239	0.6902
6.84	119.722	212.833	0.63999
6.87	89.1111	216.222	0.70815
6.9	107.833	227.444	0.67838
6.93	121.778	187.889	0.60675
6.96	33.6111	228.611	0.87182
6.99	63.6111	201.444	0.76001
7.02	125.722	239.444	0.65571
7.05	59.8889	143.278	0.70522
7.08	78.3889	150.278	0.65719
7.11	59.9444	225	0.78963
7.14	87.8333	238.111	0.73053
7.17	109.889	157.111	0.58843
7.2	95.5	237.389	0.71312
7.23	101.722	205.611	0.66902
7.26	80	207	0.72125
7.29	103.111	278.111	0.72952
7.32	53.8333	168.944	0.75835
7.35	42.0556	219.889	0.83945
7.38	88.3889	225.444	0.71836
7.41	121.444	222.667	0.64708
7.44	71.8889	170.556	0.70348
7.47	88.0556	235.778	0.72808
7.5	70.2222	193.833	0.73406
7.53	76.8333	243.944	0.76048
7.56	73.1667	245.167	0.77016
7.59	68.3889	207.611	0.75221
7.62	75.6111	246	0.7649
7.65	73.8889	170.056	0.69711
7.68	72.6667	157.611	0.68444
7.71	56.4444	215.667	0.79257
7.74	59.7222	275.556	0.82187
7.77	70.8333	219.889	0.75635
7.8	103.667	194.056	0.6518
7.83	82.6111	243.389	0.74659
7.86	83.7222	154.556	0.64864
7.89	102.056	175.444	0.63223
7.92	128.944	206	0.61503
7.95	131.111	231	0.63793
7.98	105.056	205.889	0.66214
8.01	54.8889	203.667	0.78771
8.04	92.7778	185.833	0.667
8.07	143.222	160.778	0.52887
8.1	130.556	165.556	0.5591
8.13	121.611	204.889	0.62753
8.16	74.5556	222.222	0.74878
8.19	91.7222	179.889	0.6623
8.22	93.3889	183.444	0.66265
8.25	58.5556	270.556	0.82208
8.28	100.722	188.111	0.65128
8.31	58.4444	264.444	0.819
8.34	82.7222	201.889	0.70935
8.37	94.3889	266.444	0.73841
8.4	112.889	194.167	0.63235
8.43	70.6111	206.278	0.74498
8.46	102	182.167	0.64106
8.49	83.5556	191.889	0.69665
8.52	101	210	0.67524
8.55	82.1111	167.167	0.6706
8.58	71	159.333	0.69175
8.61	99.0556	204.222	0.67338
8.64	86.2778	194	0.69217
8.67	96.2222	218.389	0.69416
8.7	96.9444	230.333	0.70379
8.73	69.4444	273.944	0.79777
8.76	82.7222	213.556	0.7208
8.79	69.1667	187.722	0.73075
8.82	130.611	164.111	0.55683
8.85	71.7778	270.556	0.79033
8.88	76.5556	237.333	0.75611
8.91	122.389	237.611	0.66003
8.94	110.167	174.889	0.61353
8.97	71.7778	211.889	0.74696
9	107.556	132.167	0.55133
9.03	67.5556	246.778	0.78508
9.06	107.556	257	0.70497
9.09	79.8333	181.722	0.69477
9.12	113.944	203.944	0.64156
9.15	69.3333	244.333	0.77896
9.18	64.1667	199.333	0.75648
9.21	89.6667	267.556	0.74899
9.24	37.6111	241.722	0.86535
9.27	122.833	248.944	0.66961
9.3	91.0556	231.889	0.71805
9.33	109.722	188.167	0.63167
9.36	72.3889	192.944	0.72718
9.39	79.6667	243.889	0.75378
9.42	126.111	198.667	0.6117
9.45	102.833	249.111	0.70781
9.48	58.1111	200.5	0.7753
9.51	98.2778	262.944	0.72793
9.54	72.8889	198.611	0.73153
9.57	101.333	161.611	0.61462
9.6	114.722	190.167	0.62372
9.63	119.278	201.056	0.62764
9.66	60.8889	189.222	0.75655
9.69	103.556	193.389	0.65126
9.72	73.5	163.111	0.68936
9.75	88.5	215.778	0.70915
9.78	132.667	196.667	0.59717
9.81	100.5	206.444	0.67258
9.84	66.7222	219.111	0.76657
9.87	100	229.556	0.69656
9.9	96.8889	180.111	0.65022
9.93	95.3889	213.833	0.69152
9.96	53.8889	196.833	0.78507
9.99	108.556	247.111	0.69478
10.02	117.667	195.667	0.62447
10.05	70.6111	198.5	0.73761
10.08	64.8333	231.056	0.78089
10.11	49.6111	122.611	0.71194
10.14	84.8333	205.333	0.70764
10.17	88.8333	198.833	0.69119
10.2	72.0556	266.167	0.78696
10.23	99.7222	210.167	0.6782
10.26	91.4444	230.778	0.71621
10.29	106.444	222.111	0.67602
10.32	116.833	212.333	0.64506
10.35	92.8889	196.167	0.67865
10.38	104.722	207.556	0.66465
10.41	75	199.722	0.727
10.44	85.8333	229.333	0.72766
10.47	109.444	146.167	0.57183
10.5	78.8333	177.444	0.69239
10.53	82.3889	200.222	0.70847
10.56	133.111	151.944	0.53303
10.59	107.722	180.667	0.62647
10.62	87.8889	207.111	0.70207
10.65	91.9444	287.222	0.75751
10.68	82.2222	190.278	0.69827
10.71	83.5	140.667	0.62751
10.74	69.6667	233.444	0.77016
10.77	84.0556	218.389	0.72208
10.8	106.778	185.889	0.63516
10.83	74.2222	198.556	0.7279
10.86	121.222	158.722	0.56698
10.89	78.3889	195.722	0.71403
10.92	62.4444	151.833	0.70858
10.95	104.833	158.556	0.60198
10.98	68.7222	171.5	0.71392
11.01	108.056	222.556	0.67316
11.04	69	239.667	0.77646
11.07	50.7778	253.444	0.83309
11.1	90.3889	200.611	0.68939
11.13	108.667	206.667	0.65539
11.16	73.0556	163.833	0.6916
11.19	112.5	173.556	0.60672
11.22	44.7778	192.722	0.81146
11.25	82.6111	213.778	0.72127
11.28	73.2778	195	0.72686
11.31	46.7778	185.167	0.79832
11.34	74	208.333	0.7379
11.37	115.222	222.389	0.65871
11.4	92	184.5	0.66727
11.43	56.7778	209.5	0.78677
11.46	83.6667	139.889	0.62575
11.49	91.7222	176.278	0.65775
11.52	98.1667	224.056	0.69534
11.55	88.2778	175.111	0.66484
11.58	104.5	289.167	0.73455
11.61	67.8889	173.778	0.71908
11.64	87.3333	177.889	0.67072
11.67	101.111	253.778	0.71509
11.7	116.111	123.444	0.51531
11.73	82.9444	194.167	0.70068
11.76	106.5	207.111	0.66041
11.79	42.6667	184.611	0.81227
11.82	80.8889	174.833	0.68368
11.85	57.1667	232.444	0.80261
11.88	94.1667	188.056	0.66634
11.91	102	195.778	0.65746
11.94	131.556	175.5	0.57156
11.97	100.833	214.556	0.68029
12	61.6111	229.944	0.78868
12.03	102.611	214.111	0.67602
12.06	108.056	223	0.6736
12.09	68.6111	162.278	0.70284
12.12	112.333	161.889	0.59036
12.15	57.8889	213	0.7863
12.18	69	153.389	0.68973
12.21	96.3333	211.444	0.687
12.24	94.1111	191.833	0.67088
12.27	85.4444	114.111	0.57183
12.3	108.444	175.389	0.61793
12.33	68.5	139.111	0.67006
12.36	71.6111	164.611	0.69685
12.39	113.389	170	0.59988
12.42	64.2778	167	0.72208
12.45	105.889	189.667	0.64173
12.48	55.1667	232.944	0.80852
12.51	62.7778	201.167	0.76216
12.54	72.5	199.833	0.73378
12.57	42.7778	186.778	0.81365
12.6	119.333	162.833	0.57708
12.63	80.5	203.722	0.71677
12.66	50.6111	180.833	0.78133
12.69	102.556	209.167	0.671
12.72	100	179.333	0.642
12.75	45.6667	213	0.82345
12.78	50	276	0.84663
12.81	97.1667	231.5	0.70436
12.84	94.6667	214.556	0.69386
12.87	69.6667	229.278	0.76696
12.9	67.5556	155.333	0.69691
12.93	49.0556	193.056	0.79738
12.96	74.3333	131.611	0.63906
12.99	137.611	168.278	0.55013
13.02	124.444	202.556	0.61944
13.05	110.944	139.5	0.55701
13.08	86.8333	202.389	0.69977
13.11	76.0556	243.444	0.76195
13.14	58	191.611	0.76764
13.17	95.5	152.222	0.61449
13.2	73.8333	193.833	0.72416
13.23	118	197.167	0.62559
13.26	55.6667	156.667	0.73783
13.29	86.3889	220.278	0.7183
13.32	91.2778	246.556	0.72981
13.35	68.1667	213.667	0.75813
13.38	55.7778	163.667	0.74582
13.41	93.8889	201.278	0.68191
13.44	93.3333	158.444	0.6293
13.47	71.7222	193.222	0.72929
13.5	83.6111	238.222	0.7402
13.53	90.2222	219.278	0.70849
13.56	64.6667	193.111	0.74914
13.59	107	175.389	0.62109
13.62	88.1667	264.056	0.74968
13.65	125.667	262.167	0.67598
13.68	90	225.111	0.71439
13.71	82.8889	179.889	0.68457
13.74	58	151.333	0.72293
13.77	64.6111	200.222	0.75603
13.8	73.7778	217	0.74627
13.83	39.8889	171.722	0.8115
13.86	99.1111	184	0.64992
13.89	79.2222	227.778	0.74195
13.92	91.8333	179.222	0.6612
13.95	102.444	171.944	0.62665
13.98	109.944	239.278	0.68517
14.01	87.5	219.556	0.71504
14.04	65.7778	178.5	0.73073
14.07	75.3333	164.667	0.68611
14.1	101.611	137.111	0.57435
14.13	78.5556	244.222	0.75663
14.16	66.7222	193.722	0.74381
14.19	79	205.944	0.72275
14.22	85.7222	206.778	0.70693
14.25	87.7222	274.556	0.75786
14.28	63.2778	176	0.73555
14.31	103.667	174.889	0.62784
14.34	74.0556	200	0.72978
14.37	71.8889	230.5	0.76226
14.4	112.444	198.056	0.63786
14.43	78.8333	245.167	0.75669
14.46	76.3333	246.167	0.76331
14.49	84.2778	183.333	0.68507
14.52	100.778	165.222	0.62114
14.55	97.6667	175.389	0.64232
14.58	60	243.167	0.80209
14.61	90.0556	217.056	0.70677
14.64	71.1667	268.889	0.79072
14.67	81.0556	186.722	0.6973
14.7	135.611	168.833	0.55456
14.73	106	185.556	0.63643
14.76	97.8333	239.444	0.70993
14.79	57.5556	190.444	0.76792
14.82	76.8889	193.889	0.71604
14.85	69.5	278.444	0.80026
14.88	74.7778	212.611	0.7398
14.91	66.5556	211.389	0.76054
14.94	121	184.167	0.6035
14.97	89.1111	135.278	0.60287

## Sheet: 20 nM BRC7T1980I
0	61.0556	168.444	0.73396
0.03	75.8889	180.111	0.70356
0.06	41.3333	224.556	0.84455
0.09	76.0556	212.889	0.73678
0.12	117.111	172.222	0.59524
0.15	56.3333	141.556	0.71533
0.18	75.3333	213.222	0.73893
0.21	50.2222	206.056	0.80403
0.24	46.0556	150.833	0.76608
0.27	52	199.278	0.79306
0.3	55.3333	172.278	0.7569
0.33	86.6667	173.5	0.66688
0.36	83.7222	187.222	0.691
0.39	52.4444	205.444	0.79664
0.42	87.5	176.167	0.66814
0.45	105.833	158.722	0.59996
0.48	94.3889	172.111	0.64582
0.51	100.667	143.667	0.58799
0.54	75.7222	187.056	0.71184
0.57	79.7778	164.444	0.67334
0.6	89.5556	170.278	0.65533
0.63	82.8889	243.889	0.74634
0.66	67.2222	137.5	0.67164
0.69	52.7222	178.444	0.77193
0.72	92.8889	152.778	0.62189
0.75	50.5556	182.167	0.78276
0.78	95	209.667	0.68818
0.81	55.7778	170.556	0.75356
0.84	69	198.833	0.74238
0.87	65.3333	154.056	0.7022
0.9	95.2222	171.833	0.64344
0.93	84.5	127.333	0.6011
0.96	100.944	191.333	0.65463
0.99	61.6111	202.556	0.76677
1.02	43.3889	224.333	0.83793
1.05	65.1667	207.889	0.76134
1.08	74.7778	158.222	0.67907
1.11	69.8333	137.222	0.66273
1.14	71.1667	204	0.74137
1.17	59.8333	167.278	0.73655
1.2	36.0556	149.778	0.80598
1.23	33.8889	186.722	0.84639
1.26	35.9444	166.111	0.82211
1.29	66.8889	154.444	0.69779
1.32	69.4444	155.722	0.69159
1.35	29.7222	186.722	0.86268
1.38	58.7778	185.333	0.75922
1.41	74.5556	139.833	0.65224
1.44	49.2222	162.389	0.76739
1.47	67.5556	164.333	0.70867
1.5	95.5556	182.222	0.656
1.53	64.6667	179.667	0.73533
1.56	56.7778	147.222	0.72168
1.59	56.2778	198.222	0.77887
1.62	100.556	147.444	0.59453
1.65	139.5	189.556	0.57606
1.68	66.5	186	0.73663
1.71	33	212.444	0.86555
1.74	91.3333	138.889	0.60328
1.77	73.5556	144.778	0.6631
1.8	71.9444	155.333	0.68345
1.83	96.5556	174.5	0.64378
1.86	88.2778	160.444	0.64507
1.89	67.3889	177.222	0.72451
1.92	64.6667	191.889	0.74794
1.95	98.7222	184.056	0.65088
1.98	88.2222	194.944	0.68844
2.01	100.111	177.167	0.63895
2.04	50.1667	141.222	0.73788
2.07	78.5556	164.333	0.67658
2.1	21.2778	154.778	0.87914
2.13	59.8333	216.889	0.78378
2.16	77.6111	192.667	0.71285
2.19	78.3889	210.611	0.72876
2.22	82	118.167	0.59034
2.25	92.4444	175.278	0.6547
2.28	72.7222	202.944	0.7362
2.31	54.8889	178.444	0.76476
2.34	72.5	126.278	0.63527
2.37	78.2222	204.111	0.72294
2.4	94.2222	151.944	0.61724
2.43	34.6111	194.389	0.84886
2.46	73.7222	147.667	0.667
2.49	67	173.778	0.72174
2.52	75.1111	159.167	0.67939
2.55	93.6111	179.778	0.65759
2.58	74.6667	156.222	0.67661
2.61	61.3889	235.278	0.79307
2.64	111	194.722	0.63693
2.67	100.056	142	0.58664
2.7	76.0556	203.944	0.72837
2.73	64.9444	168.667	0.722
2.76	84.2778	131.333	0.60912
2.79	73.7778	141.278	0.65694
2.82	39.7222	206.944	0.83896
2.85	69.3889	229.056	0.7675
2.88	63.5	190.444	0.74995
2.91	70.2222	197.944	0.73814
2.94	57.6667	168.333	0.74484
2.97	113.056	179.944	0.61414
3	69.1111	179.722	0.72226
3.03	92.6667	156.389	0.62793
3.06	63.2778	144.111	0.69488
3.09	89.7222	159.889	0.64055
3.12	85.2222	179.389	0.67793
3.15	69.3333	199.167	0.74178
3.18	96.3333	174.556	0.64438
3.21	80.8889	182	0.69231
3.24	92.7222	204.389	0.68792
3.27	78.6111	197.056	0.71483
3.3	67.1111	211.167	0.75883
3.33	115	184.667	0.61624
3.36	82.8889	125.444	0.60213
3.39	86.8333	144.111	0.62401
3.42	64.6667	191.389	0.74745
3.45	54.8333	210.944	0.79369
3.48	103.778	172.222	0.62399
3.51	62.0556	182.5	0.74625
3.54	61.1111	188.056	0.75474
3.57	63.7222	157.5	0.71195
3.6	65.1111	171.222	0.72449
3.63	61.3333	206.611	0.7711
3.66	59.3889	155	0.72299
3.69	87.7778	168.667	0.65771
3.72	86.2222	183.556	0.6804
3.75	58.8889	172.833	0.74586
3.78	79.7222	178.278	0.691
3.81	80.4444	179.389	0.6904
3.84	103.278	131.833	0.56073
3.87	61.9444	135.722	0.68662
3.9	71.5	168.778	0.70243
3.93	56.7222	142.111	0.71472
3.96	96.8333	143.667	0.59737
3.99	112.833	181.889	0.61715
4.02	66.7778	162.167	0.70832
4.05	66.5	221.444	0.76905
4.08	59	194.889	0.76761
4.11	89.3889	194.056	0.68463
4.14	84.3889	144.056	0.63059
4.17	71.6667	201.056	0.73722
4.2	86.3333	157.778	0.64634
4.23	76.8889	187.222	0.70888
4.26	70.1111	192.944	0.73347
4.29	26.1667	173.833	0.86917
4.32	84.7778	183.5	0.68399
4.35	62.1111	166.333	0.72811
4.38	50	162.167	0.76434
4.41	67.3333	168.389	0.71435
4.44	57.2778	191.444	0.76971
4.47	54.3889	193.389	0.78049
4.5	84	199.944	0.70417
4.53	99.2778	178.5	0.6426
4.56	99.1111	178.222	0.64263
4.59	120.389	192.056	0.61469
4.62	103	168.778	0.62101
4.65	18.5556	187.5	0.90995
4.68	47.6667	209.778	0.81485
4.71	90.8333	158.389	0.63553
4.74	56.2778	142.222	0.71648
4.77	61.1111	168.278	0.73359
4.8	74.8889	227.611	0.75243
4.83	52.9444	229.778	0.81273
4.86	68.0556	161.389	0.70339
4.89	64.7222	154.556	0.70484
4.92	102.389	163.889	0.61548
4.95	72.6667	156.889	0.68345
4.98	54.5556	140.778	0.72071
5.01	86.7778	176.167	0.66998
5.04	97.8333	169.778	0.63442
5.07	61.9444	181.389	0.74543
5.1	67.7222	228.111	0.77108
5.13	75.1111	167.056	0.68984
5.16	75.9444	156.722	0.67359
5.19	75.3333	182.722	0.70807
5.22	71.7222	126.167	0.63756
5.25	75.2222	137.556	0.64648
5.28	70	216.944	0.75605
5.31	50.3889	144.778	0.74182
5.34	112.444	221.5	0.66328
5.37	68.5	187	0.7319
5.4	88.0556	148	0.62697
5.43	24.3889	224	0.90181
5.46	62.8333	181.278	0.7426
5.49	84.8889	130.333	0.60558
5.52	86.3333	205.667	0.70434
5.55	76	229.278	0.75105
5.58	48.2222	164.778	0.7736
5.61	41.2778	187.889	0.81988
5.64	62.9444	152.056	0.70724
5.67	58.7222	209.278	0.78089
5.7	85.0556	119	0.58317
5.73	89.3889	103.278	0.53604
5.76	72.9444	191.667	0.72433
5.79	78.1111	166.889	0.68118
5.82	75.4444	175.556	0.69942
5.85	82.2778	184.167	0.6912
5.88	47.8889	209.833	0.81418
5.91	62.1111	156.833	0.71632
5.94	89.8889	151.944	0.6283
5.97	70.2222	182.389	0.72201
6	91.1667	211.611	0.6989
6.03	70.3333	183.222	0.72261
6.06	49.8889	143	0.74136
6.09	19.4444	220.889	0.91909
6.12	90.1667	209.667	0.69928
6.15	88.7222	183.556	0.67415
6.18	54.5	219.278	0.80093
6.21	64.3333	206.278	0.76227
6.24	75.1111	220.778	0.74615
6.27	76	190.444	0.71476
6.3	95.1667	129.5	0.57641
6.33	76.8889	233.278	0.7521
6.36	98.5556	179.167	0.64513
6.39	92	164.833	0.64179
6.42	75.1111	192.278	0.71909
6.45	110.556	107.778	0.49364
6.48	85.3889	201.222	0.70207
6.51	67.2778	179.667	0.72756
6.54	91.1667	166.722	0.64649
6.57	82.6111	191.333	0.69844
6.6	100.889	186.222	0.64861
6.63	60.3889	159.944	0.72592
6.66	101.889	206.5	0.66961
6.69	102.722	138.778	0.57465
6.72	70.6111	141.5	0.6671
6.75	50.1111	219.333	0.81402
6.78	112.833	203.944	0.64381
6.81	87.2778	235.944	0.72998
6.84	83.4444	181	0.68445
6.87	85.3889	179.556	0.67771
6.9	73.3889	137.889	0.65264
6.93	82.4444	161.611	0.66219
6.96	34.8889	271.5	0.88613
6.99	50.6667	179.667	0.78003
7.02	82.3889	209.944	0.71817
7.05	88.8333	208.167	0.7009
7.08	77.1111	165.889	0.68267
7.11	105.444	157.5	0.59899
7.14	74.7222	161.389	0.68353
7.17	89.5	136.056	0.6032
7.2	69.8889	177.778	0.71781
7.23	47	157.722	0.77042
7.26	71.5556	195.889	0.73245
7.29	46.5	218.444	0.82449
7.32	90.7222	211.889	0.7002
7.35	36.6111	193.889	0.84117
7.38	47	213.111	0.81931
7.41	54.7222	144.111	0.72478
7.44	53.9444	203.722	0.79064
7.47	101.5	193.611	0.65606
7.5	57.3889	152.111	0.72607
7.53	100.778	220.944	0.68676
7.56	62.0556	175.333	0.73859
7.59	68.6111	178	0.72178
7.62	123	180.111	0.59421
7.65	86.6667	260.056	0.75004
7.68	102.889	193.5	0.65286
7.71	74.7778	196.889	0.72474
7.74	51.7778	196.167	0.79117
7.77	67.5556	183.5	0.73091
7.8	101.944	158.833	0.60908
7.83	72	209.111	0.74387
7.86	60.5556	215.167	0.78037
7.89	74.0556	218.944	0.74725
7.92	54.6667	214.778	0.79711
7.95	69.0556	183.611	0.72669
7.98	111.611	154.278	0.58023
8.01	73.5556	221.944	0.75108
8.04	68.2222	233.389	0.77381
8.07	82.7778	168.556	0.67065
8.1	38.0556	146.889	0.79423
8.13	51.6111	129.944	0.71573
8.16	78.9444	209.722	0.72652
8.19	73.2778	181.222	0.71207
8.22	96.4444	162.167	0.62707
8.25	44.9444	282.056	0.86256
8.28	93.9444	168.556	0.64212
8.31	83.9444	146.889	0.63634
8.34	83.1667	244.778	0.7464
8.37	92.6111	209.278	0.69323
8.4	74.3333	198.889	0.72794
8.43	76.9444	167.056	0.68465
8.46	69.1667	184.833	0.72769
8.49	87.8333	213.722	0.70873
8.52	92.2778	162.889	0.63836
8.55	95.4444	254.333	0.72713
8.58	117.611	168.556	0.58901
8.61	75.1667	212.556	0.73875
8.64	99.1111	196.556	0.66479
8.67	82.1111	279	0.77262
8.7	104.222	223.222	0.68171
8.73	105.444	223.778	0.67972
8.76	69.3889	171.833	0.71234
8.79	46.0556	170.111	0.78694
8.82	59.4444	216.111	0.78427
8.85	78.7778	179	0.6944
8.88	76.4444	162.611	0.68022
8.91	98.7222	164.667	0.62518
8.94	109.778	155.722	0.58652
8.97	68.1667	180.611	0.72599
9	89.6667	171.667	0.65689
9.03	40.5556	211.333	0.83899
9.06	70.1667	209.167	0.74881
9.09	61.8333	170.833	0.73424
9.12	84.3889	133.889	0.61339
9.15	94.5556	223.389	0.7026
9.18	134.889	207.778	0.60636
9.21	66	136.889	0.6747
9.24	64.0556	178.611	0.73603
9.27	57.1667	218.111	0.79233
9.3	91.4444	186.333	0.6708
9.33	81	146.667	0.64422
9.36	74.3889	206.056	0.73475
9.39	63.2222	162.278	0.71964
9.42	82.9444	148.389	0.64145
9.45	62.6667	126.278	0.66833
9.48	90.1667	145.167	0.61686
9.51	70.0556	140.333	0.66702
9.54	103.333	187.278	0.64443
9.57	83.2222	192.722	0.69841
9.6	69.5556	191.889	0.73396
9.63	112.389	152.5	0.57571
9.66	44.0556	130.278	0.74729
9.69	87.4444	188.556	0.68317
9.72	92.7778	213.778	0.69735
9.75	59.2778	192.611	0.76467
9.78	79.3333	189.944	0.70538
9.81	74.5556	176.056	0.7025
9.84	74.0556	225.833	0.75306
9.87	97.8889	149.5	0.60431
9.9	77.5	169.778	0.68659
9.93	55.8889	162.833	0.74448
9.96	35.8333	154.722	0.81195
9.99	79.7222	227.889	0.74083
10.02	94.6111	156.944	0.6239
10.05	64.3333	162.278	0.71611
10.08	75.8889	214.111	0.73831
10.11	119.389	151.611	0.55945
10.14	94.9444	179.167	0.65363
10.17	79.6111	208.278	0.72347
10.2	87.3889	201.944	0.69796
10.23	79.4444	181.611	0.69568
10.26	84.9444	187.5	0.68821
10.29	82.5	156.556	0.65489
10.32	95.6667	199.889	0.67632
10.35	67.1667	172.778	0.72007
10.38	158.778	193.278	0.549
10.41	80.3333	246.222	0.754
10.44	75.6667	217.944	0.74229
10.47	69.6667	155.444	0.69052
10.5	94.2222	207.222	0.68743
10.53	90.3889	168	0.65018
10.56	41.8889	147.111	0.77837
10.59	103.333	224.5	0.6848
10.62	67.4444	139.556	0.67418
10.65	64.6111	226.556	0.7781
10.68	86.8333	243.667	0.73727
10.71	75.9444	165.778	0.68582
10.74	61.5	200.5	0.76527
10.77	56.1111	175.389	0.75762
10.8	74.6667	192.5	0.72052
10.83	69.5	144.611	0.6754
10.86	75.7222	205.222	0.73047
10.89	104.222	144.444	0.58088
10.92	49.1667	148.167	0.75084
10.95	81.6667	240.667	0.74664
10.98	74.6111	161.722	0.6843
11.01	77.5556	180.722	0.69972
11.04	80.3333	133.444	0.62422
11.07	51.9444	206.667	0.79914
11.1	55.6667	135.444	0.70872
11.13	65.3333	165.389	0.71683
11.16	57.9444	153.556	0.72603
11.19	67.8333	181.889	0.72836
11.22	109.167	178.056	0.61992
11.25	52.6111	195.944	0.78833
11.28	88.1667	147.278	0.62553
11.31	104.556	204.556	0.66175
11.34	30.1111	182.889	0.85863
11.37	47.5	150.944	0.76064
11.4	64.9444	199.333	0.75426
11.43	81.5556	129.667	0.61389
11.46	49.3333	151.778	0.7547
11.49	72.2778	209.222	0.74324
11.52	119.722	144.278	0.54651
11.55	106.667	197.056	0.6488
11.58	88.1111	225.444	0.71899
11.61	34.2222	171.611	0.83374
11.64	53.5	178.222	0.76912
11.67	101.778	254.333	0.7142
11.7	123.556	224.722	0.64524
11.73	67.9444	163.111	0.70594
11.76	61.1667	210.167	0.77457
11.79	108.833	190.056	0.63587
11.82	69.1111	149.111	0.6833
11.85	64.2222	174.889	0.73141
11.88	84.8333	166.444	0.66239
11.91	37.8333	140.833	0.78825
11.94	66.0556	211.778	0.76225
11.97	116.889	169.556	0.59193
12	83.1111	195	0.70116
12.03	109.167	134.722	0.55239
12.06	50.6111	145.778	0.74229
12.09	82.3333	201.333	0.70975
12.12	71.3889	171.722	0.70635
12.15	92.1111	208.833	0.69393
12.18	89.2222	185.389	0.6751
12.21	62.1111	149.667	0.70672
12.24	87.1667	174.722	0.66716
12.27	125.056	195.278	0.60961
12.3	74.8333	207.389	0.73484
12.33	112.833	219.222	0.6602
12.36	77.1111	155.222	0.6681
12.39	83.0556	179.778	0.684
12.42	68.3333	160.611	0.70153
12.45	72.1111	153.389	0.68022
12.48	30	156.5	0.83914
12.51	106.056	140.944	0.57063
12.54	93.5556	194.278	0.67497
12.57	62.9444	223.556	0.7803
12.6	41.5	210.333	0.83521
12.63	99.2222	166.667	0.62683
12.66	82.2222	168.444	0.67199
12.69	77.8889	175	0.692
12.72	111.111	155.111	0.58264
12.75	83.2778	185.5	0.69016
12.78	99.7778	178.056	0.64087
12.81	76.6667	234.667	0.75375
12.84	72.7222	201.333	0.73464
12.87	75.8889	162.333	0.68144
12.9	77.0556	196.722	0.71855
12.93	107.222	182.833	0.63034
12.96	48.4444	180.833	0.78871
12.99	43.1111	199.944	0.82263
13.02	57.6111	172.778	0.74994
13.05	118.833	130	0.52244
13.08	62.7778	228.5	0.78447
13.11	62.8333	212.944	0.77216
13.14	88.8889	153.278	0.63294
13.17	61.2778	197.833	0.76351
13.2	100	261.667	0.7235
13.23	103.056	132.222	0.56198
13.26	85.0556	209.889	0.71162
13.29	78.5556	212.611	0.7302
13.32	116.444	140.556	0.54691
13.35	48.5556	215.556	0.81615
13.38	95.1667	214.5	0.69268
13.41	86.6667	172.611	0.66574
13.44	98.3333	167.389	0.62994
13.47	94.9444	161.722	0.63009
13.5	75.1667	196.556	0.72337
13.53	93.1667	209.722	0.69241
13.56	57.6111	207.667	0.78283
13.59	58.5556	160.722	0.73296
13.62	96.5556	162.556	0.62736
13.65	50.8333	196.278	0.79429
13.68	101.444	139.5	0.57897
13.71	110.222	187.111	0.6293
13.74	97.8333	181.278	0.64948
13.77	58.5	216.667	0.7874
13.8	77	246.111	0.76169
13.83	56	189.889	0.77225
13.86	74	203.167	0.73301
13.89	67.1111	179.389	0.72774
13.92	94.6111	203.556	0.68269
13.95	98.2222	175.278	0.64087
13.98	132.667	163.333	0.5518
14.01	117.722	197.833	0.62694
14.04	65.6667	211.278	0.76289
14.07	80.1667	214	0.72748
14.1	75.4444	193.556	0.71954
14.13	30.7222	195.667	0.86429
14.16	89.7222	178.333	0.66528
14.19	103.111	180.056	0.63586
14.22	78.1111	194.333	0.7133
14.25	54	186.944	0.77588
14.28	64.4444	200.5	0.75676
14.31	102.944	187.222	0.64522
14.34	89.1111	258.611	0.74373
14.37	94.0556	194.111	0.67361
14.4	60.4444	162.889	0.72935
14.43	65.2778	167.5	0.71957
14.46	106.444	113.222	0.51543
14.49	73	225.278	0.75526
14.52	73.0556	164.667	0.69269
14.55	91.8889	172.833	0.65289
14.58	74.3889	110.111	0.59681
14.61	82.4444	145.556	0.6384
14.64	90.2778	168.056	0.65054
14.67	88.9444	187.111	0.6778
14.7	117.5	166.111	0.5857
14.73	36.4444	202.056	0.84719
14.76	97.5	125.944	0.56365
14.79	75.8889	158.333	0.676
14.82	70.1667	158	0.69248
14.85	111.556	180.611	0.61818
14.88	94.2222	190.889	0.66952
14.91	88.8889	168.667	0.65487
14.94	72.3333	202.056	0.73638
14.97	87.5556	243.444	0.73548

## Sheet: 400 nM RAD51
0	146.111	431.444	0.74702
0.03	111.944	326.389	0.74461
0.06	123.778	384.444	0.75645
0.09	179.889	290.389	0.61748
0.12	283.944	207.944	0.42275
0.15	433.889	106.667	0.19733
0.18	573.222	116.111	0.16844
0.21	523.5	97.7778	0.15738
0.24	493.889	77.4444	0.13555
0.27	498.333	133.444	0.21122
0.3	537.056	87.7778	0.14048
0.33	330.722	54.1111	0.14061
0.36	567.889	169.5	0.22987
0.39	476.222	157	0.24794
0.42	313	134.167	0.30004
0.45	379.444	47.2778	0.11079
0.48	363.889	48.6667	0.11796
0.51	592.444	88.7778	0.13032
0.54	489.722	70.5556	0.12593
0.57	416.722	138	0.24877
0.6	420.667	152.389	0.26592
0.63	439.556	206.167	0.31928
0.66	524.056	105.778	0.16795
0.69	590.833	104.389	0.15015
0.72	596.556	68.7778	0.10337
0.75	315.111	61.1111	0.16243
0.78	573.5	147.667	0.20476
0.81	504.444	89.2778	0.15037
0.84	504.167	164.722	0.24626
0.87	524.667	140.056	0.2107
0.9	406.111	128.167	0.23989
0.93	603.611	83.7778	0.12188
0.96	548.444	125.056	0.18568
0.99	462.222	112.389	0.19559
1.02	420.556	85.6667	0.16923
1.05	449.444	72.1667	0.13835
1.08	489.944	97.3889	0.16582
1.11	456.722	128.5	0.21957
1.14	550.444	154.611	0.21929
1.17	430.833	78.6667	0.1544
1.2	667.556	106.333	0.1374
1.23	619.556	121.222	0.16364
1.26	460.167	131.333	0.22203
1.29	408.833	169	0.29247
1.32	596.167	127.722	0.17644
1.35	473.056	116.5	0.19761
1.38	551.444	67.4444	0.10898
1.41	472.222	105.611	0.18277
1.44	401.778	118.222	0.22735
1.47	472.556	95.2778	0.16779
1.5	441.667	130.889	0.2286
1.53	440.444	98.8889	0.18335
1.56	429.278	94.7222	0.18077
1.59	461.889	82.8333	0.15207
1.62	495.667	59.9444	0.10789
1.65	331.444	150.556	0.31236
1.68	451.778	76.7222	0.14517
1.71	446.389	152.444	0.25457
1.74	419	104.333	0.19936
1.77	440.611	115.889	0.20825
1.8	402.667	134.778	0.25078
1.83	419.5	80	0.16016
1.86	562.778	69.5	0.10992
1.89	449.222	126.222	0.21935
1.92	376.611	118.556	0.23943
1.95	276.944	40.7222	0.12819
1.98	440.389	116.944	0.20983
2.01	475.833	127.444	0.21125
2.04	480.889	40.6667	0.07797
2.07	695.278	89.9444	0.11455
2.1	382.667	68.3889	0.15162
2.13	342.778	130.611	0.27591
2.16	390	62.3889	0.13791
2.19	435	93.9444	0.17761
2.22	348.111	139	0.28536
2.25	325.944	209.278	0.39101
2.28	367.611	131.222	0.26306
2.31	512.111	89.6667	0.149
2.34	575.056	138.944	0.1946
2.37	572.889	144.5	0.20142
2.4	484.889	105.389	0.17854
2.43	454.833	90.3333	0.1657
2.46	494.722	105.667	0.176
2.49	508.333	132.056	0.20621
2.52	410.333	48.6667	0.10603
2.55	316.722	7.77778	0.02397
2.58	530.667	129.444	0.19609
2.61	547.5	96.1667	0.1494
2.64	417.333	148.556	0.26252
2.67	492.389	132.167	0.21162
2.7	429.944	91.8889	0.17609
2.73	407.111	134.278	0.24802
2.76	539.722	85.8889	0.13729
2.79	443.389	61.7778	0.12229
2.82	414.056	156.833	0.27472
2.85	439.222	122.556	0.21816
2.88	502.778	106.778	0.17517
2.91	527.5	51.8889	0.08956
2.94	560.222	105.056	0.15791
2.97	409.778	110.056	0.21171
3	541.222	88.1111	0.14001
3.03	545.889	131.722	0.19439
3.06	494.944	143.722	0.22503
3.09	380.722	112.333	0.22783
3.12	383.333	98.3889	0.20424
3.15	438.722	148.611	0.25303
3.18	418.278	91.3889	0.17931
3.21	498.833	116.056	0.18874
3.24	543.722	94.1111	0.14755
3.27	562.778	130.5	0.18824
3.3	393.167	209.333	0.34744
3.33	199.444	106.389	0.34787
3.36	402.444	62	0.13349
3.39	403.944	94.8889	0.19022
3.42	379.333	152.833	0.28719
3.45	476.778	149.278	0.23844
3.48	403.833	131.111	0.24509
3.51	589.944	129.167	0.17962
3.54	533.111	88.6111	0.14253
3.57	512.222	112.667	0.1803
3.6	534.278	113.944	0.17578
3.63	329.444	83.8333	0.20285
3.66	486.389	142	0.22597
3.69	455.667	75.3333	0.14187
3.72	475.889	135.111	0.22113
3.75	438.611	85.1111	0.16251
3.78	455.222	77.1111	0.14485
3.81	527.889	62.5556	0.10595
3.84	523.333	147.389	0.21975
3.87	488.944	81.0556	0.1422
3.9	524.889	149	0.2211
3.93	578.722	115.333	0.16617
3.96	529.5	86.9444	0.14104
3.99	453.167	115.833	0.20357
4.02	392.278	170.389	0.30282
4.05	527.833	112.944	0.17626
4.08	159.556	33.5	0.17353
4.11	554.722	113.444	0.16978
4.14	482.111	117.056	0.19536
4.17	586.278	190.333	0.24508
4.2	596.333	140.111	0.19025
4.23	522.333	80.4444	0.13346
4.26	386.278	205.667	0.34744
4.29	323.056	120.778	0.27212
4.32	399.444	94.2778	0.19095
4.35	542.167	87.2222	0.13858
4.38	580.222	122.389	0.17419
4.41	413.556	68.8333	0.14269
4.44	442.889	161.833	0.26762
4.47	530.389	151.056	0.22167
4.5	434.444	125.833	0.22459
4.53	410.722	31.6111	0.07146
4.56	399.722	87.2778	0.17922
4.59	297.833	196	0.3969
4.62	374.556	183.611	0.32895
4.65	418.111	162.833	0.28029
4.68	502.111	143.056	0.22173
4.71	387.389	71.5556	0.15591
4.74	334.5	126.167	0.27388
4.77	421.778	169.944	0.2872
4.8	400.389	189	0.32067
4.83	591.333	171.111	0.22442
4.86	425	68.2222	0.13832
4.89	428.778	117.611	0.21525
4.92	489.833	82.3333	0.1439
4.95	464.833	57	0.10923
4.98	367	98.6111	0.21179
5.01	537.833	151.333	0.21959
5.04	408.889	96.5556	0.19103
5.07	550.222	155.056	0.21985
5.1	514.333	86.3889	0.14381
5.13	493.167	131.611	0.21065
5.16	454.444	127.222	0.21872
5.19	447.278	144.444	0.24411
5.22	488.389	122.222	0.20016
5.25	537.778	88.7778	0.14169
5.28	494.444	50.8889	0.09332
5.31	490.722	121.667	0.19868
5.34	395.667	134	0.25299
5.37	678	149.778	0.18094
5.4	453.556	108.556	0.19312
5.43	376.444	103.167	0.2151
5.46	340.111	161.667	0.32219
5.49	527.889	79	0.13017
5.52	289.611	24.2222	0.07718
5.55	594.444	63.2778	0.09621
5.58	480.833	88.6667	0.15569
5.61	582.333	19.5556	0.03249
5.64	645.833	131.611	0.16929
5.67	504.167	58.5556	0.10406
5.7	405.444	38.5556	0.08684
5.73	397.333	75.8889	0.16037
5.76	490.5	105.722	0.17732
5.79	532.722	86.1667	0.13923
5.82	552.833	156.556	0.22069
5.85	520.056	145.278	0.21835
5.88	595.333	81.8333	0.12085
5.91	538.222	56.7778	0.09542
5.94	464.889	28.1667	0.05713
5.97	987.833	64.6667	0.06144
6	601.389	69.1111	0.10307
6.03	519.5	53.6667	0.09363
6.06	632.5	64.5556	0.09261
6.09	487.278	54	0.09976
6.12	534.944	78.6111	0.12812
6.15	529.389	130	0.19715
6.18	530.167	126.833	0.19305
6.21	590.611	151.278	0.20391
6.24	595.222	118.278	0.16577
6.27	498.611	107.667	0.17759
6.3	615.778	115.778	0.15826
6.33	643.667	90.9444	0.1238
6.36	444.722	70.9444	0.13758
6.39	497.333	69.8889	0.12321
6.42	647.889	90.5	0.12256
6.45	810	154.778	0.16043
6.48	320.167	44.8333	0.12283
6.51	544.556	91.6111	0.144
6.54	606.222	85.2778	0.12332
6.57	556.333	52.1667	0.08573
6.6	564.278	57.4444	0.0924
6.63	569.167	84.6667	0.12949
6.66	666	128.333	0.16156
6.69	532	123	0.18779
6.72	531.444	30	0.05343
6.75	534.722	60.7222	0.10198
6.78	585.278	63.5	0.09788
6.81	483.778	88.5556	0.15473
6.84	451.778	105.667	0.18956
6.87	387.222	46.9444	0.10813
6.9	425	269.111	0.38771
6.93	440.5	155.333	0.2607
6.96	520.667	177.611	0.25436
6.99	383.667	166.944	0.3032
7.02	403.611	66.8333	0.14206
7.05	596.111	55.1111	0.08463
7.08	617.889	63.3889	0.09304
7.11	547.5	55.6667	0.09229
7.14	685.778	96.7222	0.12361
7.17	403.833	53.1111	0.11623
7.2	394.167	97.3889	0.19812
7.23	602.722	103.722	0.14682
7.26	486.222	100.444	0.17121
7.29	364.167	154.056	0.29728
7.32	509.944	126.444	0.19869
7.35	373.222	120.722	0.2444
7.38	333.222	55.6667	0.14314
7.41	399.444	76.2222	0.16024
7.44	373.389	52.2778	0.12281
7.47	562.278	91.8333	0.14039
7.5	601.222	60.8333	0.09189
7.53	522.167	106.944	0.16999
7.56	522.611	114.944	0.18029
7.59	486.778	107.389	0.18074
7.62	582.889	103.444	0.15072
7.65	658.222	151.5	0.1871
7.68	582.222	141.5	0.19552
7.71	710.056	132	0.15676
7.74	545.556	116.889	0.17645
7.77	645.5	115	0.15122
7.8	458.444	187.667	0.29046
7.83	472	83.0556	0.14963
7.86	496.889	111.056	0.18267
7.89	360.111	90.1667	0.20025
7.92	460.778	192.889	0.29509
7.95	415	122.389	0.22775
7.98	355.278	50.8889	0.12529
8.01	443.278	196.5	0.30714
8.04	543.5	114.333	0.1738
8.07	588.056	150.222	0.20348
8.1	459.278	107.167	0.18919
8.13	552.611	70.5	0.11314
8.16	481.389	132.833	0.21626
8.19	488.778	172.778	0.26117
8.22	423.333	149.444	0.26091
8.25	453.333	131.611	0.225
8.28	509	146.278	0.22323
8.31	668.056	128.611	0.16144
8.34	541.556	96.3333	0.15102
8.37	477.722	55.1111	0.10343
8.4	451.778	48.7222	0.09735
8.43	279	115.056	0.29198
8.46	401.556	82.8333	0.17101
8.49	464.444	68.8889	0.12917
8.52	423.944	140.278	0.24862
8.55	347.833	164.722	0.32137
8.58	457.444	193.278	0.29702
8.61	471.389	121.056	0.20433
8.64	480.778	127.278	0.20932
8.67	589.833	152.556	0.20549
8.7	619.167	128.889	0.1723
8.73	610.056	70.5	0.10359
8.76	494.667	139.722	0.22025
8.79	493.722	155	0.23893
8.82	542.556	86.7778	0.13789
8.85	608.611	138.833	0.18574
8.88	560	171.389	0.23433
8.91	498.611	150.5	0.23186
8.94	514	143.611	0.21838
8.97	501.111	136.333	0.21387
9	459.111	109.833	0.19305
9.03	482.278	106.444	0.18081
9.06	375.278	129.056	0.25589
9.09	456.5	92.2222	0.16807
9.12	458.111	121.111	0.20909
9.15	454.167	125.889	0.21703
9.18	548.444	157.5	0.22311
9.21	580.389	76.1667	0.11601
9.24	503.556	101.778	0.16814
9.27	463.833	112.889	0.19574
9.3	542.333	72.3889	0.11776
9.33	537.944	132.944	0.19816
9.36	546.222	178.5	0.2463
9.39	529.222	150.389	0.22129
9.42	536.167	126.556	0.19096
9.45	554.222	79.8333	0.12591
9.48	422.056	129.444	0.23471
9.51	461.611	116.333	0.20129
9.54	494.944	134.278	0.2134
9.57	491.056	128.333	0.20719
9.6	457.389	153.833	0.25168
9.63	518.667	104.278	0.16739
9.66	512.333	75.2778	0.12811
9.69	638.556	60.3889	0.0864
9.72	509.333	129.778	0.20306
9.75	475.278	110.889	0.18918
9.78	441.333	167.889	0.27558
9.81	401.944	160.389	0.28522
9.84	490.833	224.056	0.31341
9.87	551.778	122.444	0.18161
9.9	505.833	80.7778	0.1377
9.93	545.278	161.611	0.22862
9.96	316.722	190.389	0.37544
9.99	518.278	160.222	0.23614
10.02	373.722	156.278	0.29486
10.05	424.5	84.8889	0.16665
10.08	565.778	128.278	0.18482
10.11	503.889	98.8333	0.16398
10.14	589.778	125.611	0.17558
10.17	572.611	90.7222	0.13677
10.2	389.167	215.667	0.35657
10.23	422.722	122.222	0.22428
10.26	432.111	164.722	0.27599
10.29	546	121.611	0.18216
10.32	428	139.944	0.24641
10.35	406.111	158.722	0.28101
10.38	553.722	146.333	0.20903
10.41	475.722	111.333	0.18965
10.44	492	130.333	0.20943
10.47	455.667	177.944	0.28084
10.5	590.611	100.833	0.14583
10.53	480.278	115.056	0.19326
10.56	474.222	111.556	0.19044
10.59	574.278	139.278	0.19519
10.62	517.111	54.1667	0.09482
10.65	517.389	100.667	0.16288
10.68	554.778	169.278	0.23379
10.71	471.278	138.444	0.22706
10.74	511.278	115.5	0.18428
10.77	456	125.056	0.21522
10.8	470.667	188.556	0.28603
10.83	489.056	105.944	0.17806
10.86	440.833	158.389	0.26432
10.89	389	151	0.27963
10.92	570.111	178.778	0.23872
10.95	583.222	153.389	0.20824
10.98	344.444	58.5	0.14518
11.01	444.278	160.222	0.26505
11.04	442.667	72.2222	0.14027
11.07	360.333	162.389	0.31066
11.1	444.056	153.444	0.25681
11.13	498.667	117.278	0.1904
11.16	336.556	170.389	0.33611
11.19	342.278	154.111	0.31046
11.22	92.8889	23.5	0.20191
11.25	374.056	158.333	0.2974
11.28	417.944	121	0.22451
11.31	457.278	51.6111	0.10142
11.34	493.944	178.833	0.26581
11.37	527.444	178.444	0.25279
11.4	535.056	189.333	0.26137
11.43	481.222	130.5	0.21333
11.46	389.222	190.833	0.32899
11.49	443.222	141.944	0.24257
11.52	421.722	107.833	0.20363
11.55	385	112.667	0.22639
11.58	496.556	149.444	0.23134
11.61	502.389	100.944	0.16731
11.64	472.556	130.056	0.21582
11.67	445.889	77.7222	0.14844
11.7	444.222	109.944	0.1984
11.73	484.056	129.833	0.21149
11.76	596.944	142.667	0.19289
11.79	463.444	138.778	0.23044
11.82	496.556	125	0.20111
11.85	517.778	115.778	0.18274
11.88	483	111.556	0.18763
11.91	480.056	77.6667	0.13926
11.94	514	164.056	0.24195
11.97	358.833	120.833	0.25191
12	483.444	111.333	0.18718
12.03	533.944	132.722	0.19908
12.06	662.278	101.833	0.13327
12.09	479	89.1111	0.15686
12.12	498.833	118.5	0.19195
12.15	483.389	90.2222	0.15729
12.18	352.667	79.3333	0.18364
12.21	507.056	186.944	0.26937
12.24	487.167	152.5	0.23841
12.27	588.556	142.778	0.19523
12.3	521.111	102.944	0.16496
12.33	434.111	124.556	0.22295
12.36	522.056	79.7778	0.13256
12.39	661.722	138.611	0.17319
12.42	465	150.556	0.24458
12.45	449.944	115.389	0.20411
12.48	486	103.833	0.17604
12.51	535.167	79.9444	0.12997
12.54	548.333	107.611	0.16406
12.57	539.5	140.778	0.20694
12.6	584.833	146.778	0.20062
12.63	476.278	193.389	0.28878
12.66	522.833	123.333	0.19087
12.69	548.833	99.4444	0.1534
12.72	415.389	113.056	0.21394
12.75	564.444	137	0.19531
12.78	352.889	108.222	0.2347
12.81	426.278	95.3889	0.18285
12.84	463.111	80.6667	0.14834
12.87	536.556	144.778	0.21249
12.9	546.167	162.556	0.22936
12.93	382.556	169.167	0.30662
12.96	483.444	156	0.24396
12.99	400.111	192.556	0.3249
13.02	352.944	227.833	0.39229
13.05	449.944	172.278	0.27688
13.08	496.611	66.4444	0.11801
13.11	449.167	104.333	0.1885
13.14	540.556	145.222	0.21176
13.17	386.944	146.167	0.27418
13.2	363.611	129.889	0.2632
13.23	548.444	131.056	0.19287
13.26	362.667	155.167	0.29965
13.29	473.167	105.111	0.18177
13.32	512.833	115.833	0.18425
13.35	507.333	154.167	0.23306
13.38	484.056	105.444	0.17887
13.41	681.611	112.333	0.14149
13.44	504.056	133.778	0.20974
13.47	541.889	160.556	0.22857
13.5	567	77.7222	0.12055
13.53	559.389	71.6667	0.11357
13.56	537.889	84	0.13507
13.59	535.333	75.6667	0.12384
13.62	606.333	115.611	0.16014
13.65	465.556	221.389	0.32228
13.68	551.333	90.8333	0.14145
13.71	440.722	146.556	0.24955
13.74	576.778	108.5	0.15833
13.77	576.111	237.111	0.29157
13.8	597.333	149.389	0.20006
13.83	445.389	93.6111	0.17368
13.86	558.278	76.9444	0.12113
13.89	364.333	114.5	0.23912
13.92	527.444	85.3333	0.13926
13.95	572.111	138.111	0.19446
13.98	547.611	193.278	0.26087
14.01	503.5	201.889	0.28621
14.04	450.556	180.556	0.28609
14.07	280.444	90.7222	0.24442
14.1	104	40.0556	0.27806
14.13	366.111	120.111	0.24703
14.16	510.889	103.778	0.16884
14.19	464.944	137.222	0.22788
14.22	454	82	0.15299
14.25	372.444	75.7222	0.16896
14.28	341.667	66.9444	0.16383
14.31	509.778	126.5	0.19881
14.34	431.278	120.5	0.21839
14.37	508.556	122.667	0.19433
14.4	444.667	165.278	0.27097
14.43	483.333	163.722	0.25303
14.46	371.944	197.167	0.34645
14.49	466.667	113.056	0.19502
14.52	542.5	105.222	0.16245
14.55	463.667	56.5556	0.10871
14.58	594.944	103.5	0.14819
14.61	462.889	50.7222	0.09876
14.64	384.833	85.8889	0.18246
14.67	473.833	124.333	0.20786
14.7	447.056	86	0.16133
14.73	409.5	131.722	0.24338
14.76	401.556	69.9444	0.14834
14.79	517.056	83.6111	0.1392
14.82	380.222	66.2778	0.14844
14.85	505.389	53.5	0.09573
14.88	371.444	73.5556	0.16529
14.91	437.778	88.9444	0.16886
14.94	436.778	124.389	0.22166
14.97	509.722	96.0556	0.15857
