# Supplementary material for: BRCA2 BRC missense variants disrupt RAD51-dependent DNA repair
Source: eLife journal article supplement (doi:10.7554/elife.79183), 2022-09-13
Supplement: fig6-data1 [file Figure 6C-source data1-quantification DNA strand exchange.xlsx]

## Sheet: Graph
Figure 6C-Source Data 1
Graphics represented in GraphPad Prism 9 as XY graph ploting mean and SD
nM	BRCA2 wt			T1980I			RAD51
0	5.56897	1.46573	3.25704	4.14703	1.66813	4.4061	4.3	6.2
10	6.29229	5.36452	6.1783	3.52059	1.5451	4.48735
20	7.79485	10.8824	11.4518	5.18274	2.09469	5.89817
40	14.0794	14.2417	23.5429	8.71961	4.8243	10.5333

## Sheet: Raw data
Raw data Quantification
	2019-05-03
	No.	Label	Type	Volume (Int)	Subtract Bck	Fraction of product	%Product
Free DNA	1	U1	No Protein	2.79827e+06	2.78031e+06
	2	U2	RAD51	1.70829e+06	1.69033e+06
	3	U3	0	2.72943e+06	2.71147e+06
	4	U4	10	2.55718e+06	2.53922e+06
	5	U5	20	2.48088e+06	2.46291e+06
	6	U6	40	1.94634e+06	1.92838e+06
	7	U7	0	1.80371e+06	1.78575e+06
	8	U8	10	2.01854e+06	2.00058e+06
	9	U9	20	1.9601e+06	1.94213e+06
	10	U10	40	1.82246e+06	1.8045e+06
Product	11	U11	No Protein	28336	10373.4	0.00371715	0.371715
	12	U12	RAD51	68955.8	50993.2	0.0292842	2.92842
	13	U13	0	147185	129222	0.0454897	4.54897	BRCA2 WT
	14	U14	10	188466	170504	0.0629229	6.29229
	15	U15	20	263210	245248	0.0905587	9.05587
	16	U16	40	333956	315993	0.140794	14.0794
	17	U17	0	76352.2	58389.6	0.0316622	3.16622	T1980I
	18	U18	10	144772	126809	0.0596078	5.96078
	19	U19	20	175790	157827	0.0751571	7.51571
	20	U20	40	86037.6	68075	0.0363537	3.63537
	21	U21	Backround	17962.6
	2019-05-03
	No.	Label	Type	Volume (Int)
Free DNA	1	U1	No Protein	2.73069e+06	2.71273e+06
	2	U2	RAD51	2.55663e+06	2.53866e+06
	3	U3	0	2.62422e+06	2.60626e+06
	4	U4	10	2.51823e+06	2.50026e+06
	5	U5	20	2.5277e+06	2.50973e+06
	6	U6	40	2.0533e+06	2.03534e+06
	7	U7	0	2.18743e+06	2.16947e+06
	8	U8	10	2.73623e+06	2.71827e+06
	9	U9	20	2.72309e+06	2.70513e+06
	10	U10	40	2.45459e+06	2.43663e+06
Product	11	U11	No Protein	24441.4	6478.75	0.00238259	0.238259
	12	U12	RAD51	96911.9	78949.3	0.0301608	3.01608
	13	U13	0	56239.2	38276.6	0.0144738	1.44738	BRCA2 WT
	14	U14	10	159221	141259	0.0534763	5.34763
	15	U15	20	323994	306031	0.108685	10.8685
	16	U16	40	355551	337589	0.142267	14.2267
	17	U17	0	54274.9	36312.3	0.0164623	1.64623	T1980I
	18	U18	10	75630.9	57668.3	0.0207744	2.07744
	19	U19	20	59923.6	41961	0.0152747	1.52747
	20	U20	40	140997	123034	0.0480666	4.80666
	21	U21	Backround	17462.9
	2019-04-26 DNA strand exchange
	No.	Label	Type	Volume (Int)
Free DNA	1	U1	RAD51	323812	298808
	2	U2	0	563046	538042
	3	U3	10	557846	532843
	4	U4	20	509098	484094
	5	U5	40	482408	457404
	6	U6	0	498458	473454
	7	U7	10	641479	616475
	8	U8	20	613933	588929
	9	U9	40	852018	827015
	10	U10	RAD51	38207.6	13203.7	0.0423179	4.23179
Product	11	U11	0	43118.1	18114.2	0.0325704	3.25704	BRCA2 WT
	12	U12	10	56882.2	31878.3	0.0564497	5.64497
	13	U13	20	93915.8	68911.9	0.124613	12.4613
	14	U14	40	126142	101138	0.181075	18.1075
	15	U15	0	46826.2	21822.3	0.044061	4.4061	T1980I
	16	U16	10	53966.9	28963	0.0448735	4.48735
	17	U17	20	61917.1	36913.3	0.0589817	5.89817
	18	U18	40	122372	97367.8	0.105333	10.5333
	19	U19	Backround	25003.9
