# Supplementary material for: BRCA2 BRC missense variants disrupt RAD51-dependent DNA repair
Source: eLife journal article supplement (doi:10.7554/elife.79183), 2022-09-13

**B**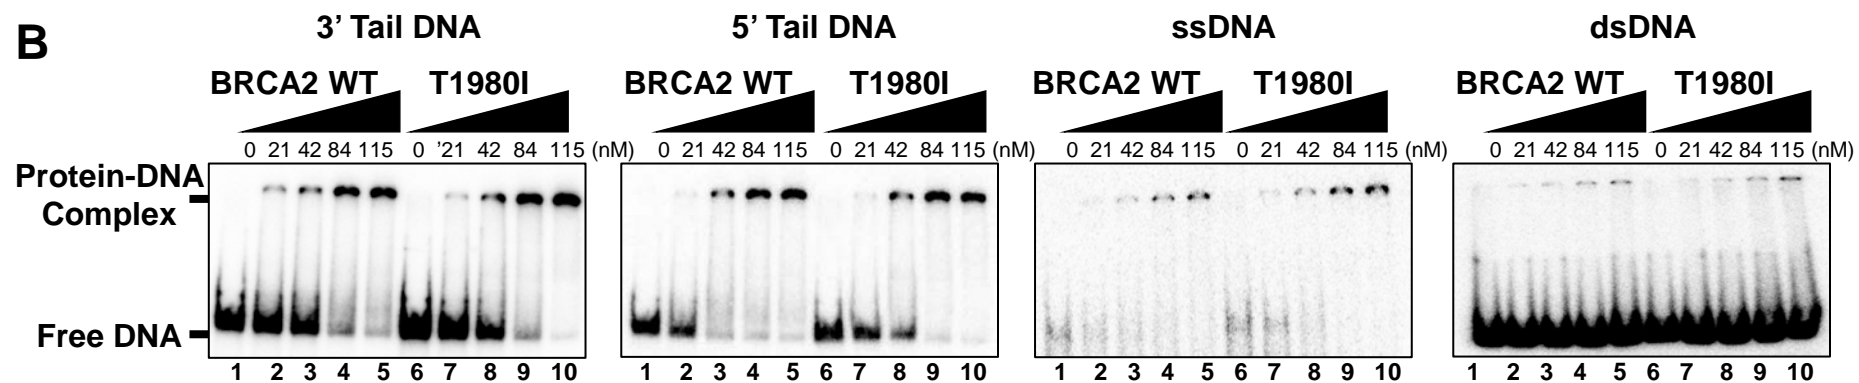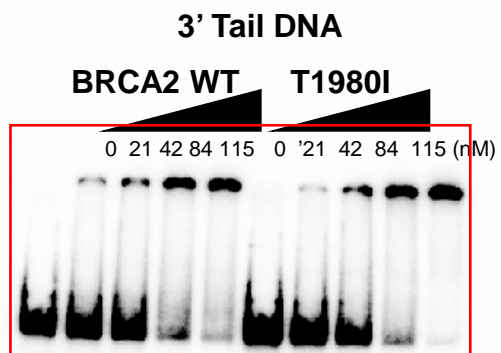

**B**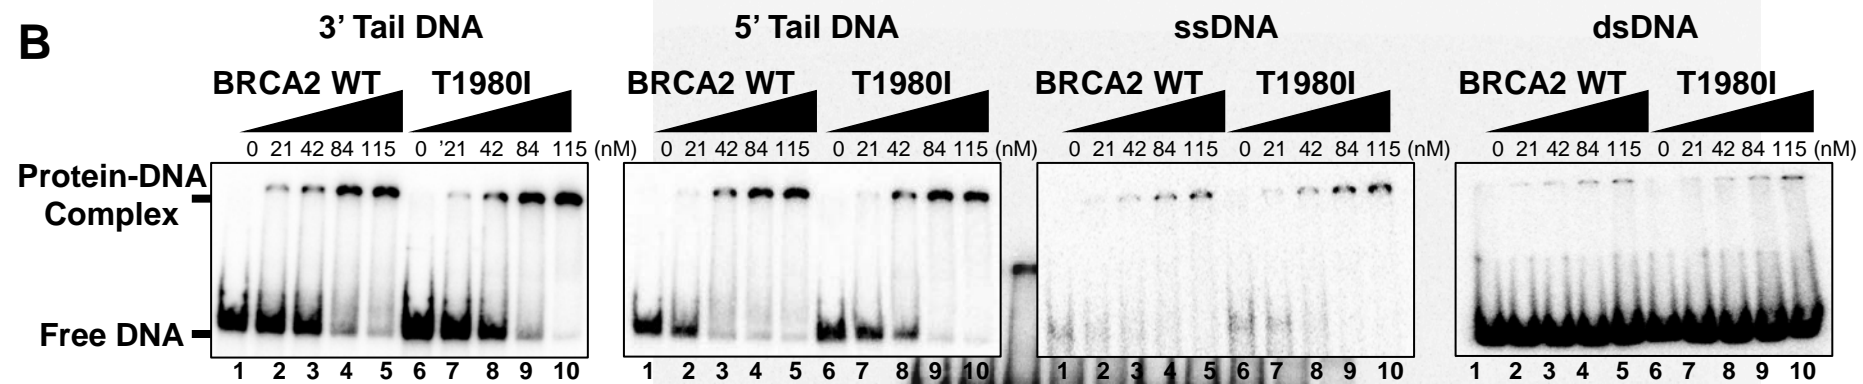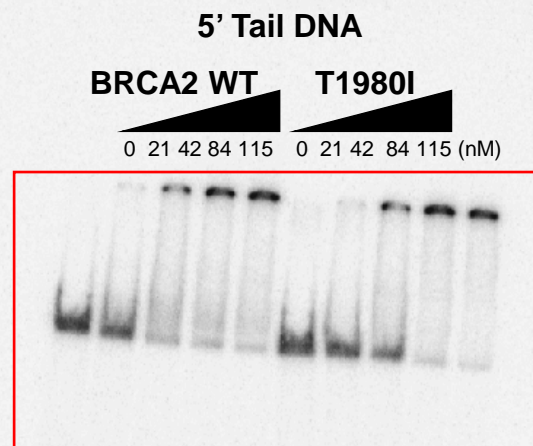

**B****3' Tail DNA****5' Tail DNA****ssDNA****dsDNA****BRCA2 WT****T1980I****BRCA2 WT****T1980I****BRCA2 WT****T1980I****BRCA2 WT****T1980I**

0 21 42 84 115

0 21 42 84 115

(nM)

0 21 42 84 115

0 21 42 84 115

(nM)

0 21 42 84 115

0 21 42 84 115

(nM)

0 21 42 84 115

(nM)

**Protein-DNA  
Complex****Free DNA**

1

2

3

4

5

6

7

8

9

10

1

2

3

4

5

6

7

8

9

10

1

2

3

4

5

6

7

8

9

10

1

2

3

4

5

6

7

8

9

10

**ssDNA****BRCA2 WT****T1980I**

0 21 42 84 115

0 21 42 84 115

(nM)

**B**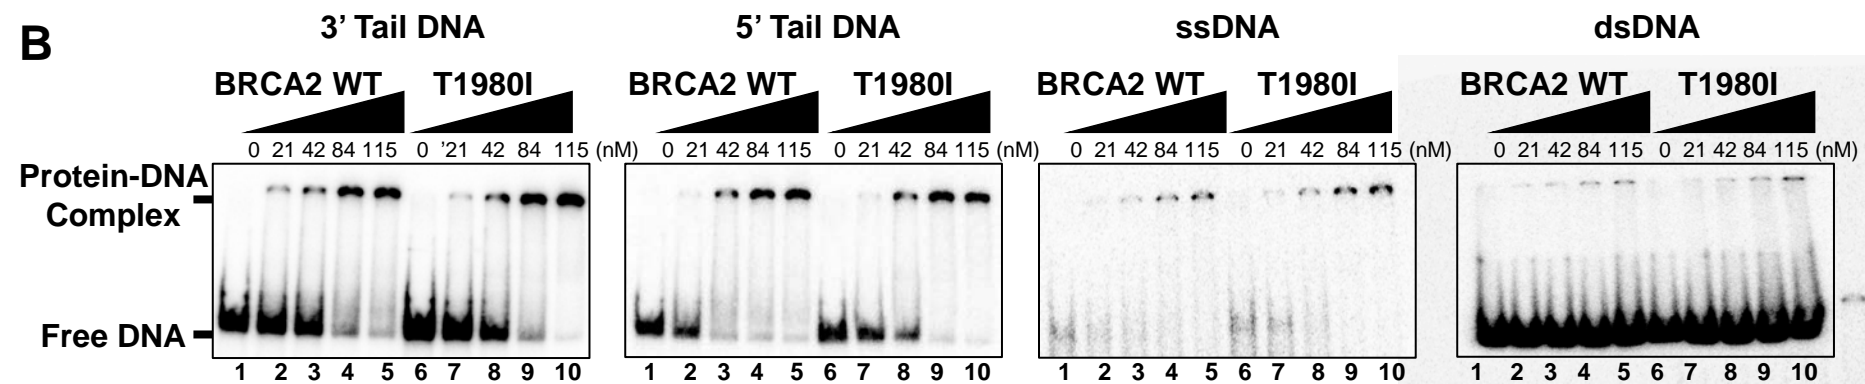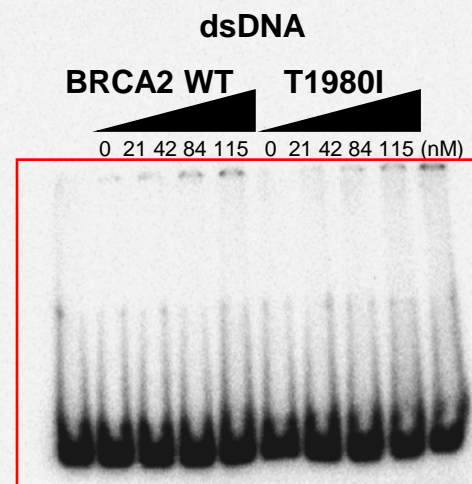

Supplement: fig6-figsupp1-data1 [file elife-79183-fig6-figsupp1-data1-v3.zip]
