# Supplementary material for: BRCA2 BRC missense variants disrupt RAD51-dependent DNA repair
Source: eLife journal article supplement (doi:10.7554/elife.79183), 2022-09-13
Supplement: fig6-figsupp1-data1 [file Figure 6-figure supplement 1B-source data6-quantification.xlsx]

## Sheet: Data
Supplementary Figure 9B-Source data1
3'Tail
		2XMBP BRCA2 wt				BRCA2 T1980I
0		0	0	0	0	0	0	0	0
21		1.11955	3.87547	11.179	4.85652	16.811	11.0645	5.19401	30.3407
42		0.860803	2.23072	13.2997	15.3983	14.1777	11.9777	30.3569	54.7666
84		27.1699	26.9087	27.1973	58.528	49.0003	47.8512	40.665	82.3516
115		66.1565	65.2904	67.8862	69.6974	70.9685	68.1385	72.1825	95.9382
5'tail
nM		2XMBP BRCA2 wt		BRCA2 T1980I
0		0	0	0	0
21		12.08	15.9213	4.77133	19.9258
42		30.5357	54.5479	28.531	40.7648
84		56.7377	65.3505	49.0135	82.6954
115		68.5796	71.9856	82.0484	89.98
ssDNA
nM		2XMBP BRCA2 wt		BRCA2 T1980I
0		0		0
21		52.8		54.13
42		74.76		86.67
84		83.43		99.11
115		96.79		98.42
dsDNA
		2XMBP BRCA2 wt		BRCA2 T1980I
0		0		0
21		3.69		10.37
42		9.87		16.88
84		10.49		32.34
115		20.77		34.53

## Sheet: 3'tail raw data
2019-04-19
EMSA OVER weekend
No.	Label	Type	Volume (Int)
1	U1	0	787302	738508	1	0	0
2	U2	21	779034	730240	0.988805	0.0111955	1.11955
3	U3	42	780945	732150	0.991392	0.00860803	0.860803
4	U4	84	586650	537856	0.728301	0.271699	27.1699
5	U5	115	298731	249937	0.338435	0.661565	66.1565
6	U6	0	818594	769800	1	0	0
7	U7	21	689183	640389	0.83189	0.16811	16.811
8	U8	42	709454	660660	0.858223	0.141777	14.1777
9	U9	84	441390	392596	0.509997	0.490003	49.0003
10	U10	115	272279	223485	0.290315	0.709685	70.9685
11	U11	Unknown	48794.1
top RPA bottom EMSA 4-19-19
No.	Label	Type	Volume (Int)
1	U1	0	270569	244322	1	0	0	wt
2	U2	21	261100	234853	0.961245	0.0387548	3.87548
3	U3	42	265119	238871	0.977693	0.0223072	2.23072
4	U4	84	204825	178578	0.730913	0.269087	26.9087
5	U5	115	111051	84803.1	0.347096	0.652904	65.2904
6	U6	0	270999	244752	1	0	0	T1980I
7	U7	21	243919	217671	0.889355	0.110645	11.0645
8	U8	42	241684	215436	0.880223	0.119777	11.9777
9	U9	84	153883	127635	0.521488	0.478512	47.8512
10	U10	115	104229	77981.7	0.318615	0.681385	68.1385
11	U11	Unknown	26247.4	0
2019-19-19
No.	Label	Type	Volume (Int)
1	U1	0	248542	220138	1	0	0	wt
2	U2	21	223933	195529	0.88821	0.11179	11.179
3	U3	42	219264	190860	0.867003	0.132997	13.2997
4	U4	84	188670	160266	0.728027	0.271973	27.1973
5	U5	115	99098.6	70694.5	0.321138	0.678862	67.8862
6	U6	0	235570	207166	1	0	0	T1980I
7	U7	21	224810	196406	0.94806	0.0519401	5.19401
8	U8	42	172681	144277	0.696431	0.303569	30.3569
9	U9	84	151326	122922	0.59335	0.40665	40.665
10	U10	115	86032.4	57628.3	0.278175	0.721825	72.1825
11	U11	Unknown	28404.1	0
2019-06-07 judit 5' 3' T1980I			3'tail
No.	Label	Type	Volume (Int)
1	U1	0	3.91952e+06	3.85126e+06	1	0	0	wt
2	U2	21	3.73248e+06	3.66422e+06	0.951435	0.0485652	4.85652
3	U3	42	3.32649e+06	3.25823e+06	0.846017	0.153983	15.3983
4	U4	84	1.66545e+06	1.59719e+06	0.41472	0.58528	58.528
5	U5	115	1.23529e+06	1.16703e+06	0.303026	0.696974	69.6974
6	U6	0	6.30381e+06	6.23555e+06	1	0	0	T1980I
7	U7	21	4.4119e+06	4.34364e+06	0.696593	0.303407	30.3407
8	U8	42	2.88881e+06	2.82055e+06	0.452335	0.547665	54.7665
9	U9	84	1.16873e+06	1.10048e+06	0.176484	0.823516	82.3516
10	U10	115	321534	253276	0.0406181	0.959382	95.9382
11	U11	Unknown	68257.9	0

## Sheet: 5'tail
2019-06-07 judit 5' 3' T1980I			5'tail
No.	Label	Type	Volume (Int)
1	U1	0	667039	627652	1	0	0	wt
2	U2	21	567108	527722	0.840787	0.159213	15.9213
3	U3	42	324668	285281	0.454521	0.545479	54.5479
4	U4	84	256865	217478	0.346495	0.653505	65.3505
5	U5	115	215220	175833	0.280144	0.719856	71.9856
6	U6	0	667753	628366	1	0	0	T1980I
7	U7	21	542546	503159	0.800742	0.199258	19.9258
8	U8	42	411601	372214	0.592352	0.407648	40.7648
9	U9	84	148123	108736	0.173046	0.826954	82.6954
10	U10	115	102349	62962.1	0.1002	0.8998	89.98
11	U11	Unknown	39386.7	0
Top Gel 5'tail Josh
wt	1	8216.15	0
	2	7223.64	0.1208
	3	5707.3	0.305357
	4	3554.5	0.567377
	5	2581.55	0.685796
T1980I	6	7800.15	0
	7	7427.98	0.0477133
	8	5574.69	0.28531
	9	3977.02	0.490135
	10	1400.26	0.820484

## Sheet: ssDNA
Top Gel ssDNA Judit
wt	1	23171.9	0	0
	2	10937.4	21nM	0.52799
	3	5849.32	42nM	0.747568
	4	3838.67	84nM	0.834339
	5	742.799	115nM	0.967944
T1980I	6	36497.5	0	0
	7	16742.2	21nM	0.541278
	8	4864.56	42nM	0.866715
	9	324.607	84nM	0.991106
	10	576.335	115nM	0.984209

## Sheet: dsDNA
Top Gel PS4-PS5 Judit
wt	1	72462.8		0
	2	69788		0.0369124
	3	65312.3		0.0986777
	4	64859		0.104934
	5	57408.7		0.207749
T1980I	6	60157.8		0
	7	53920.1		0.103689
	8	50003.6		0.168792
	9	40704.7		0.323368
	10	39388.2		0.345252
