# Supplementary material for: BRCA2 BRC missense variants disrupt RAD51-dependent DNA repair
Source: eLife. 2022 Sep 13;11:e79183. doi: 10.7554/eLife.79183 (PMC9545528; doi:10.7554/eLife.79183)
Supplement: Figure 2—figure supplement 2—source data 1. [file elife-79183-fig2-figsupp2-data1.xlsx]

## Sheet: Sheet1
Plating Efficiency
Exp 1 2020-03-01 MMC-Olaparib				Exp2 2020-02-25BMN-Cisplatin				Exp 3 2020-09-10MMC-Cisplatin				Exp 4 2020-09-10Olaparib-BMN
	PE				PE				PE
DLD1 -/-	0.266667			DLD1 -/-	0.201167			DLD1 -/-	0.429667			DLD1 -/-	0.7095
WT1-4	0.37			WT1-4	0.79			WT1-4	0.356333			WT1-4	0.518
S1221P 2	0.101			S1221P 2	0.216667			S1221P 2	0.097			S1221P 2	0.0793333
T1346I 6	0.204			T1346I 6	0.226333			T1346I 6	0.162667			T1346I 6	0.305
T1980I 16	0.59			T1980I 16	0.703333			T1980I 16	0.315667			T1980I 16	0.393
