# Supplementary figures and images for: BRCA2 BRC missense variants disrupt RAD51-dependent DNA repair
Source: eLife journal article supplement (doi:10.7554/elife.79183), 2022-09-13

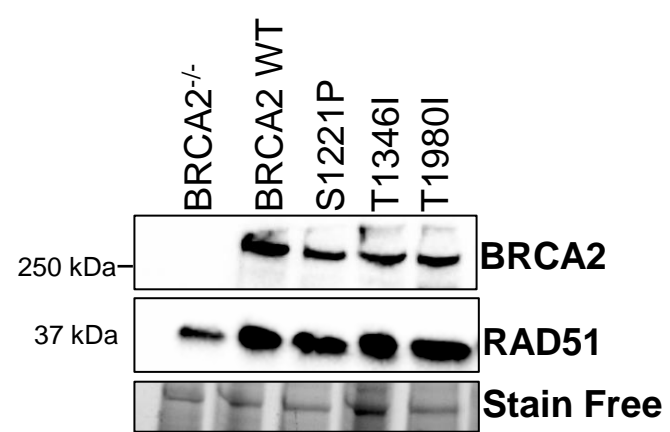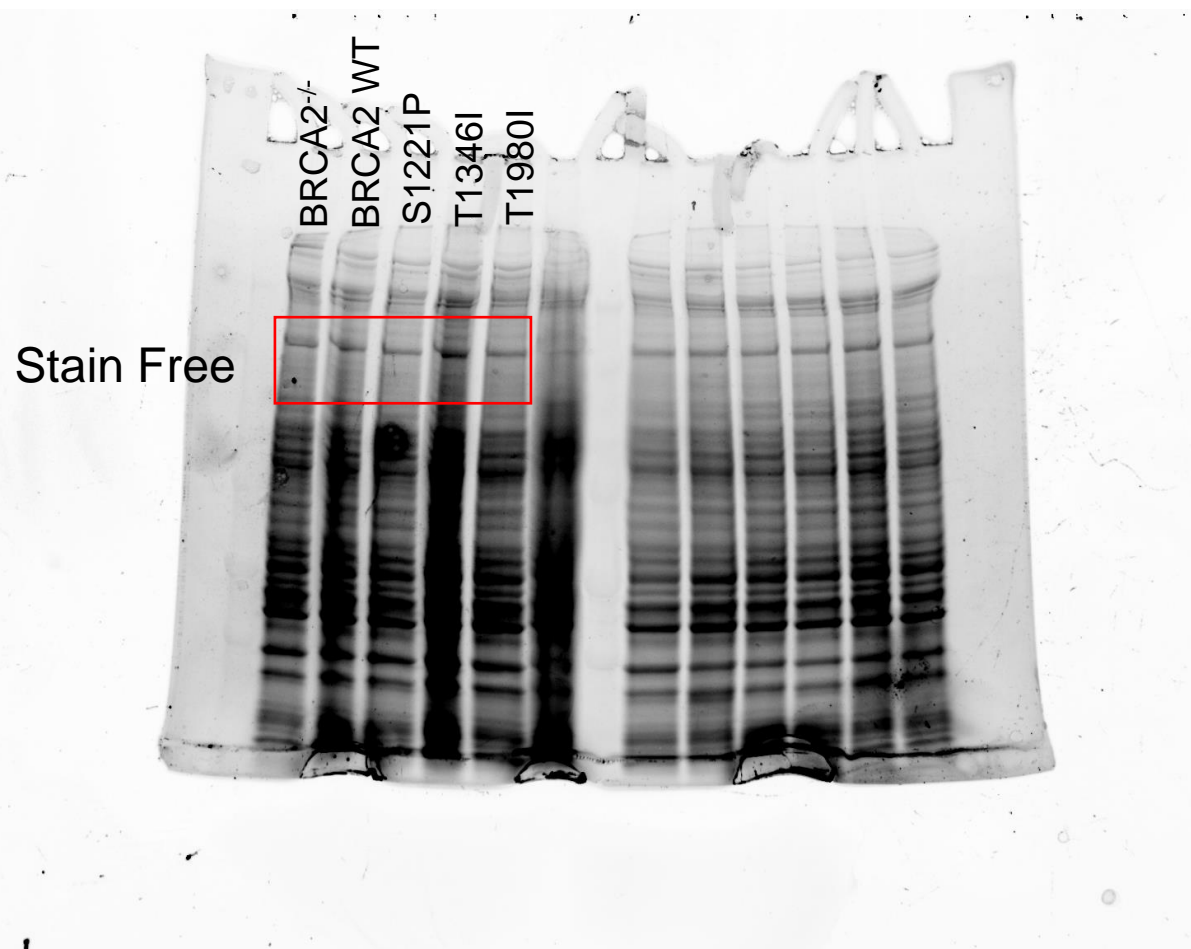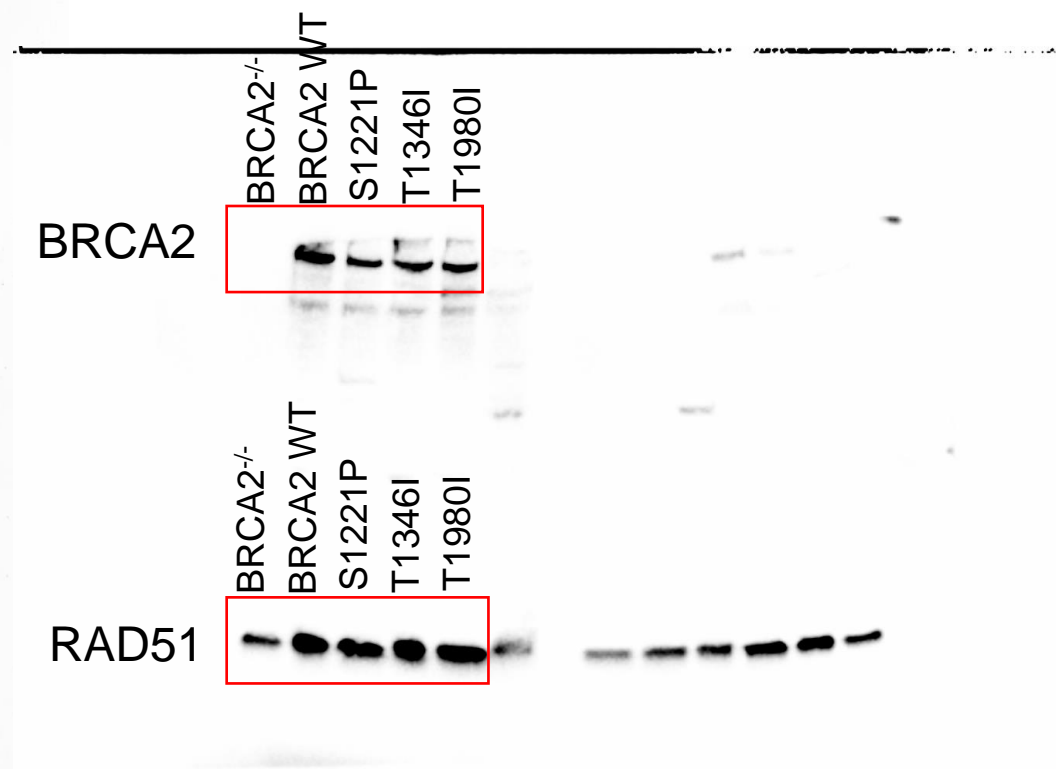

Supplement: fig2-data1 [file elife-79183-fig2-data1-v3.zip]

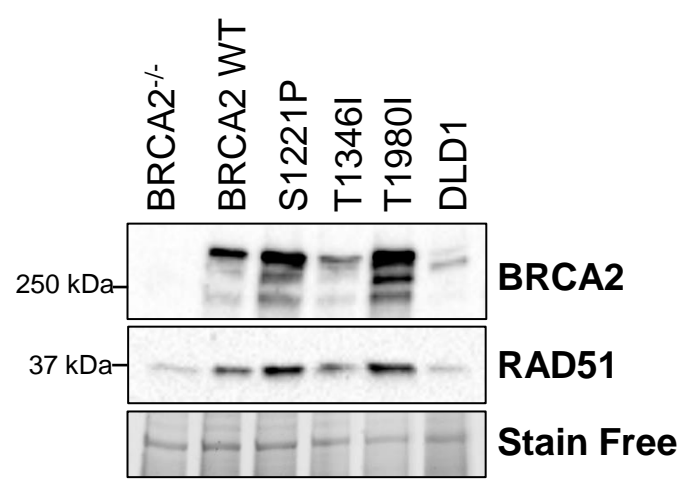

BRCA2 Nterminus antibody

## Nt and Ct BRCA2 antibodies

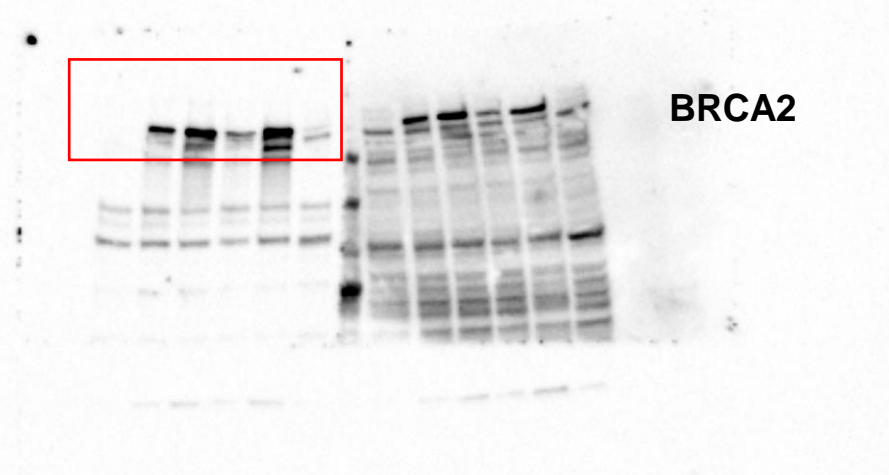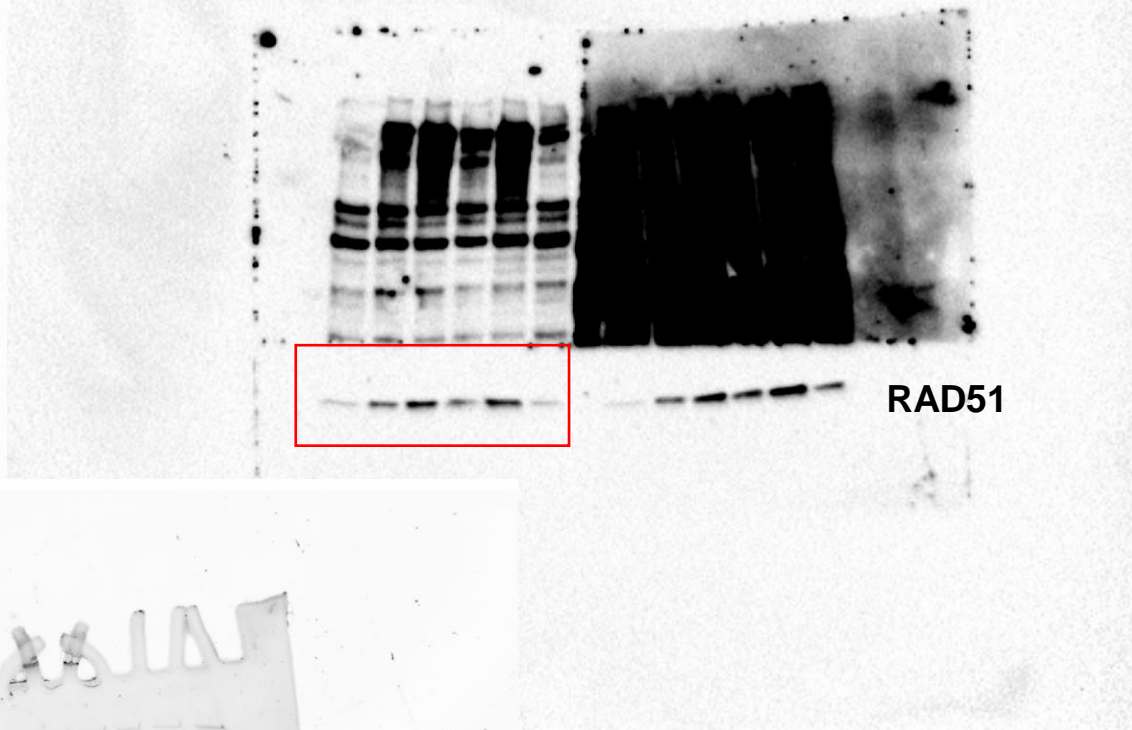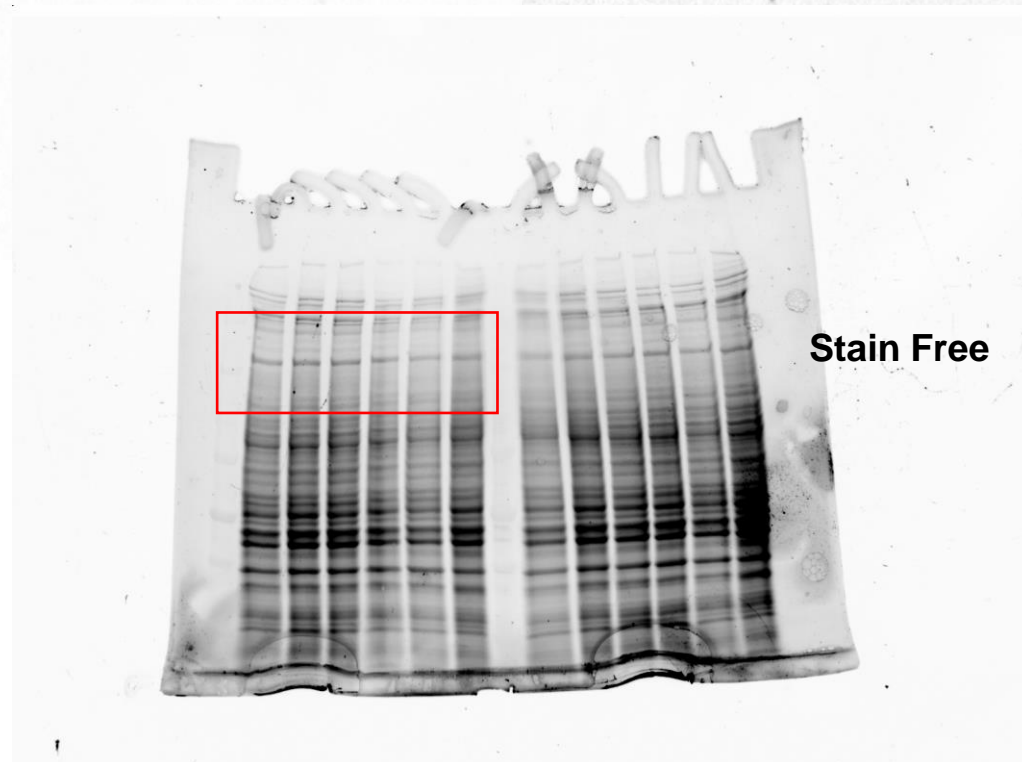

Supplement: fig2-figsupp1-data1 [file Figure1-suppfig2-highlightedbandsandlabelsA.pdf › Figure 2-figure supplement 1-source data1 A/Figure1-suppfig2-highlightedbandsandlabelsA.pdf]

**E**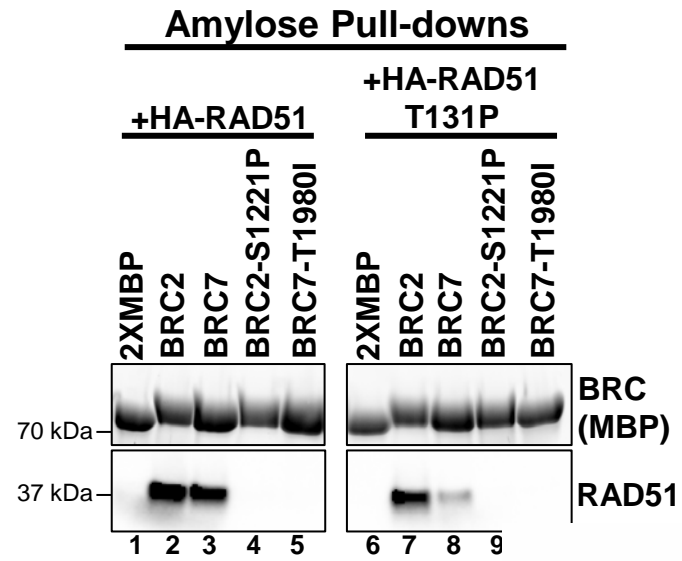

**Amylose Pull-downs**

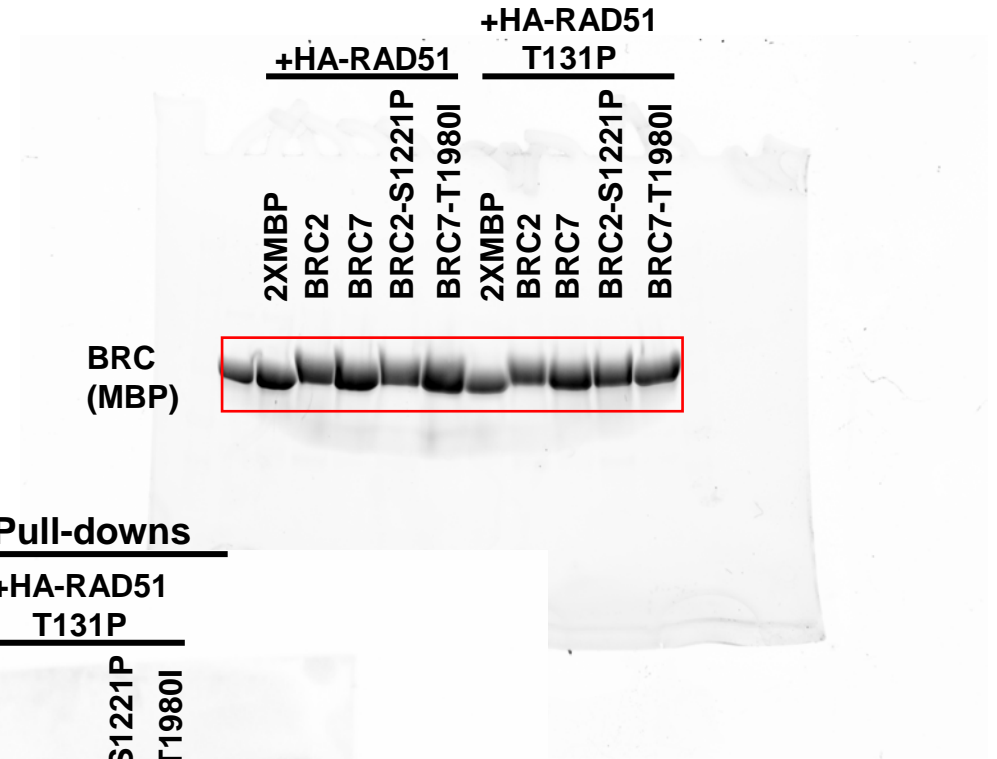

**Amylose Pull-downs**

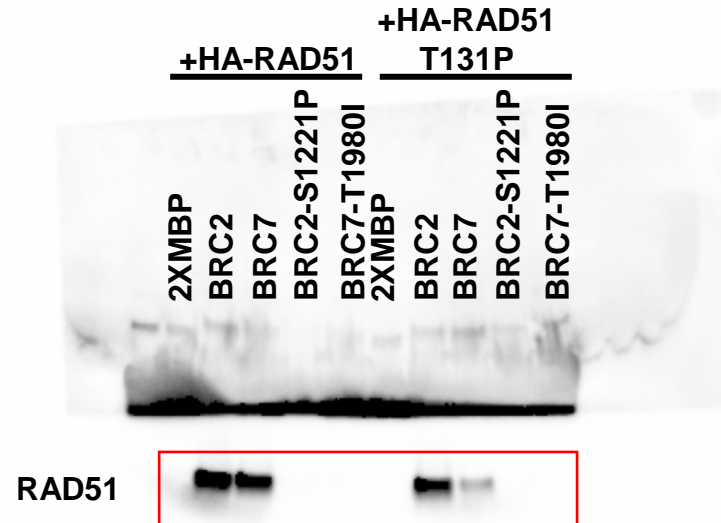

Supplement: fig4-data1 [file elife-79183-fig4-data1-v3.zip]

**B**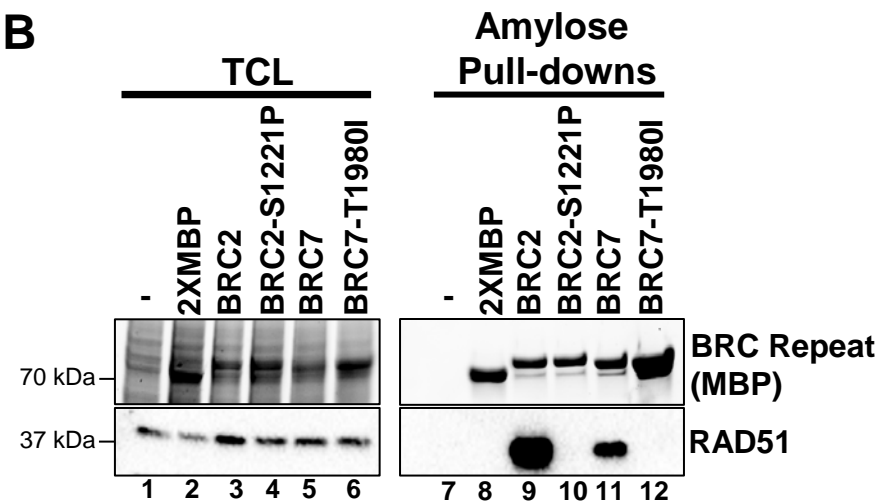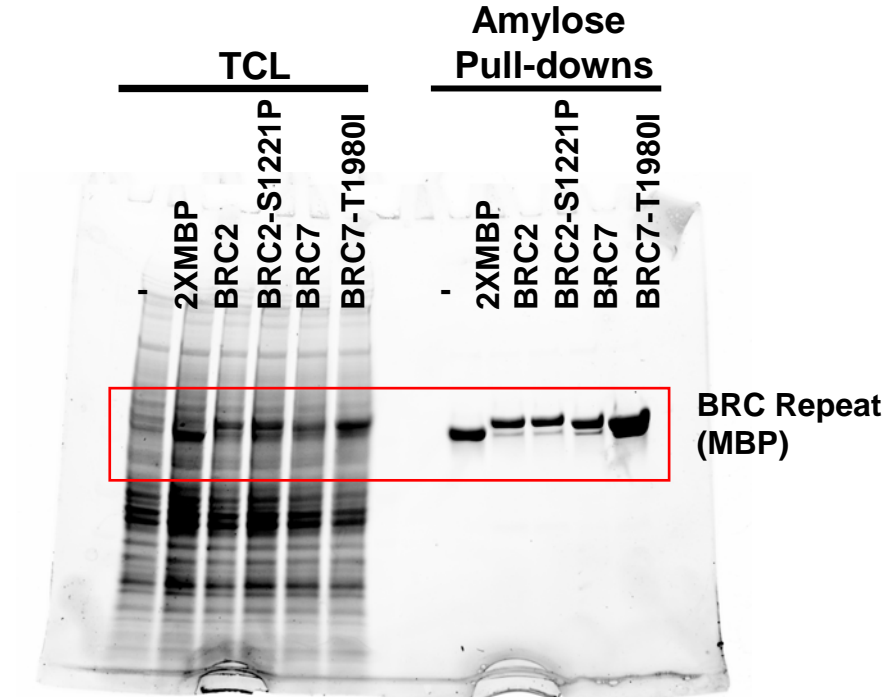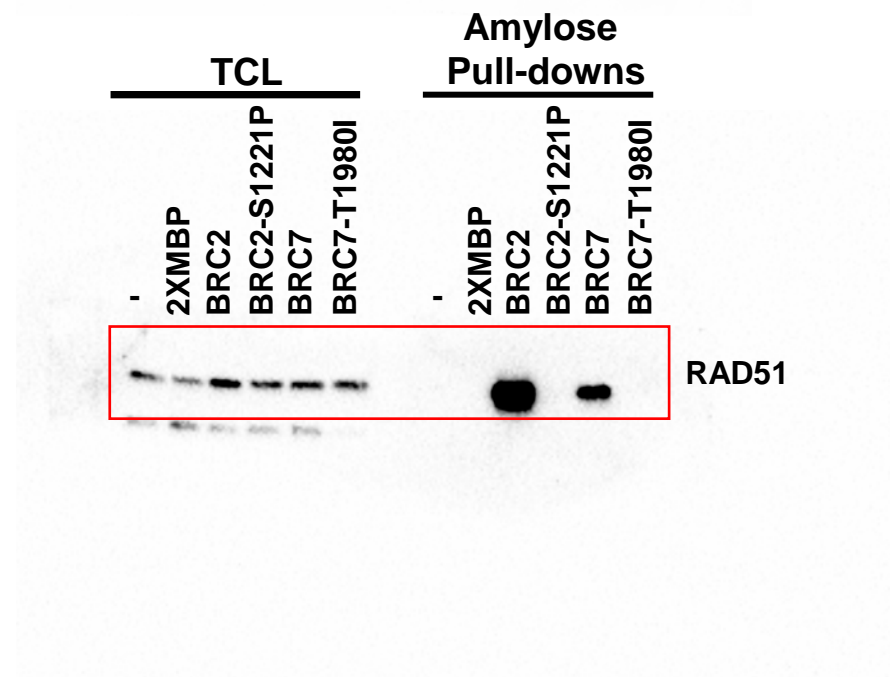

Supplement: fig4-data1 [file elife-79183-fig4-data1-v3.zip]

D

## Amino-linked synthetic peptides

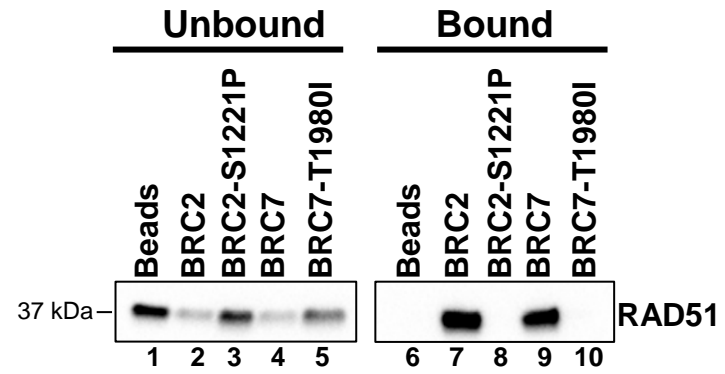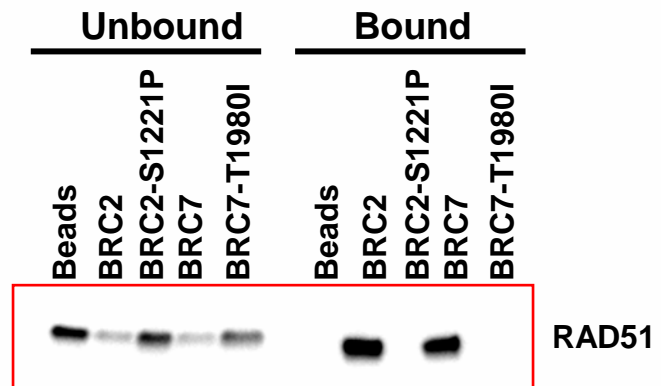

Supplement: fig4-data1 [file elife-79183-fig4-data1-v3.zip]

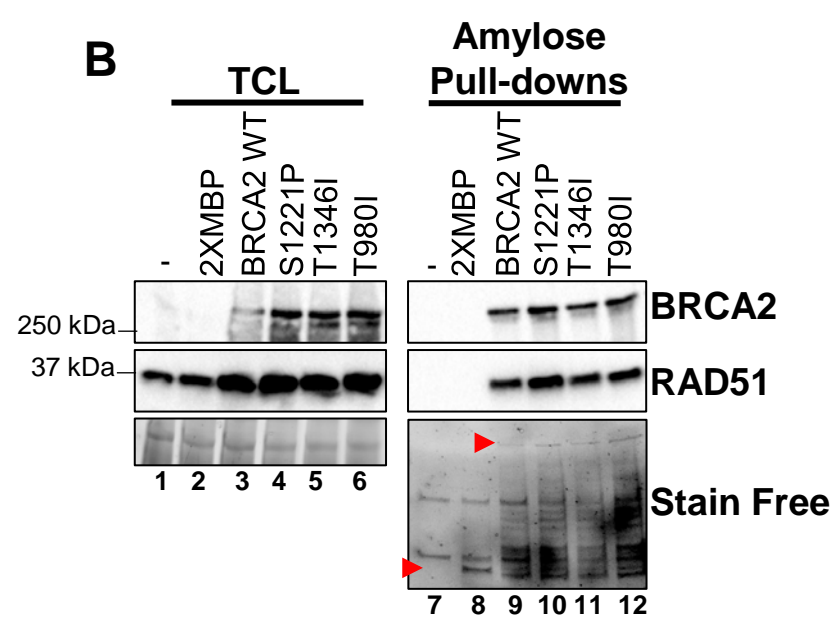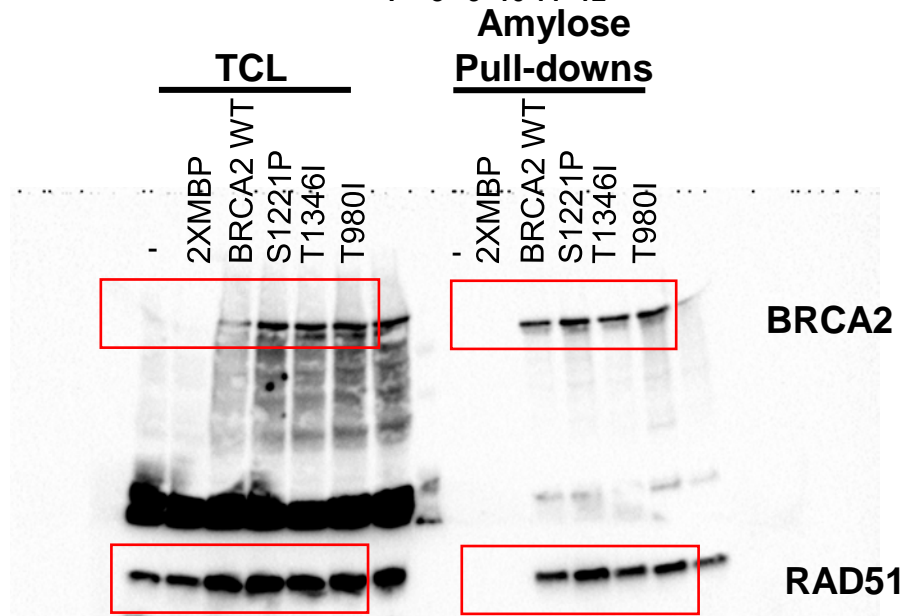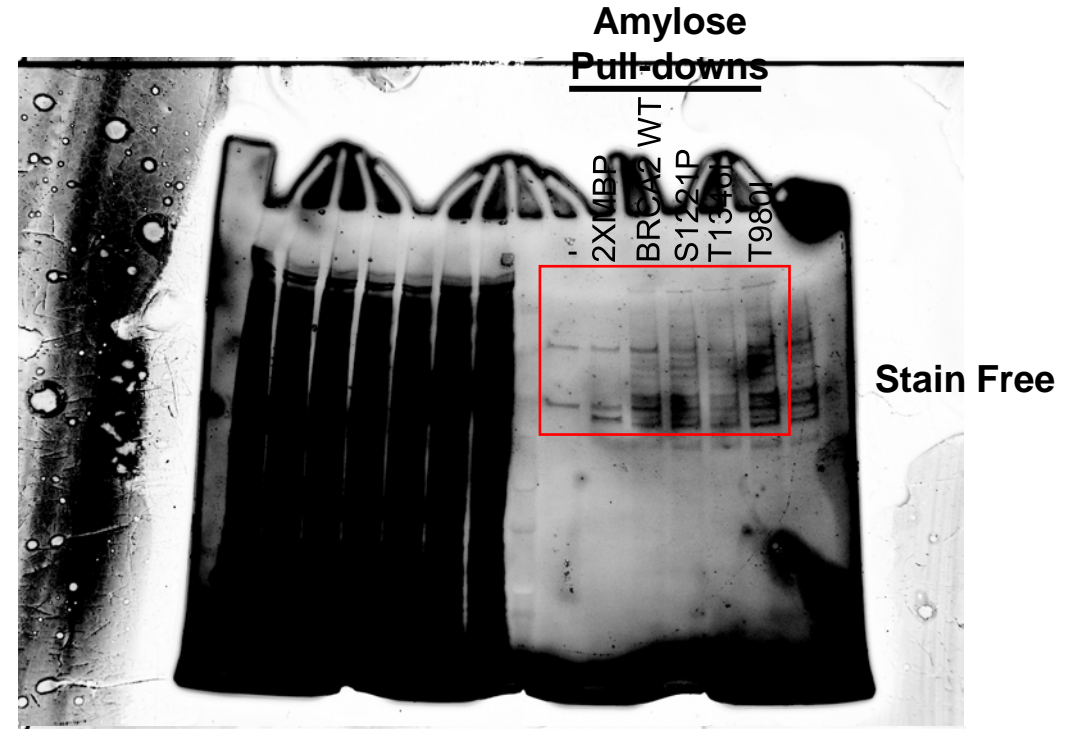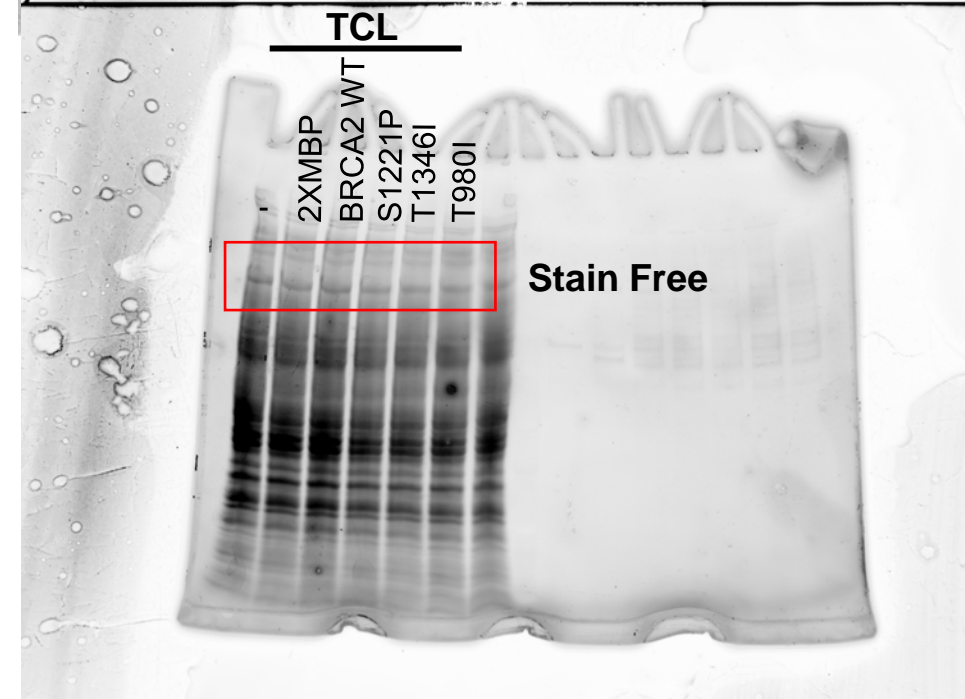

Supplement: fig4-figsupp1-data1 [file elife-79183-fig4-figsupp1-data1-v3.zip]

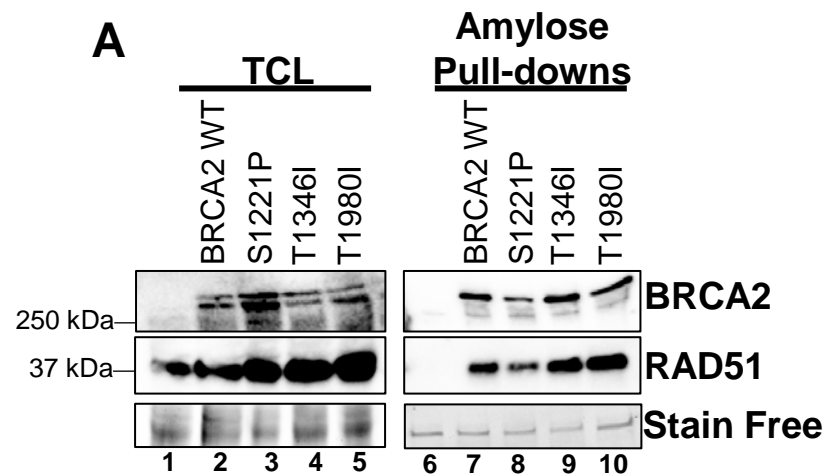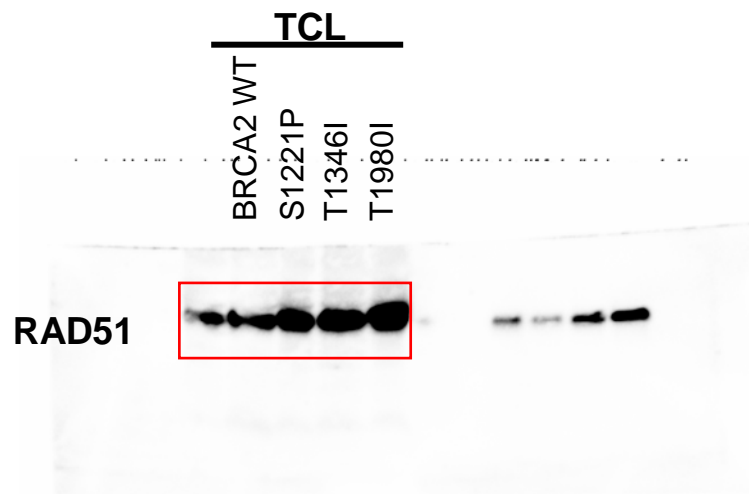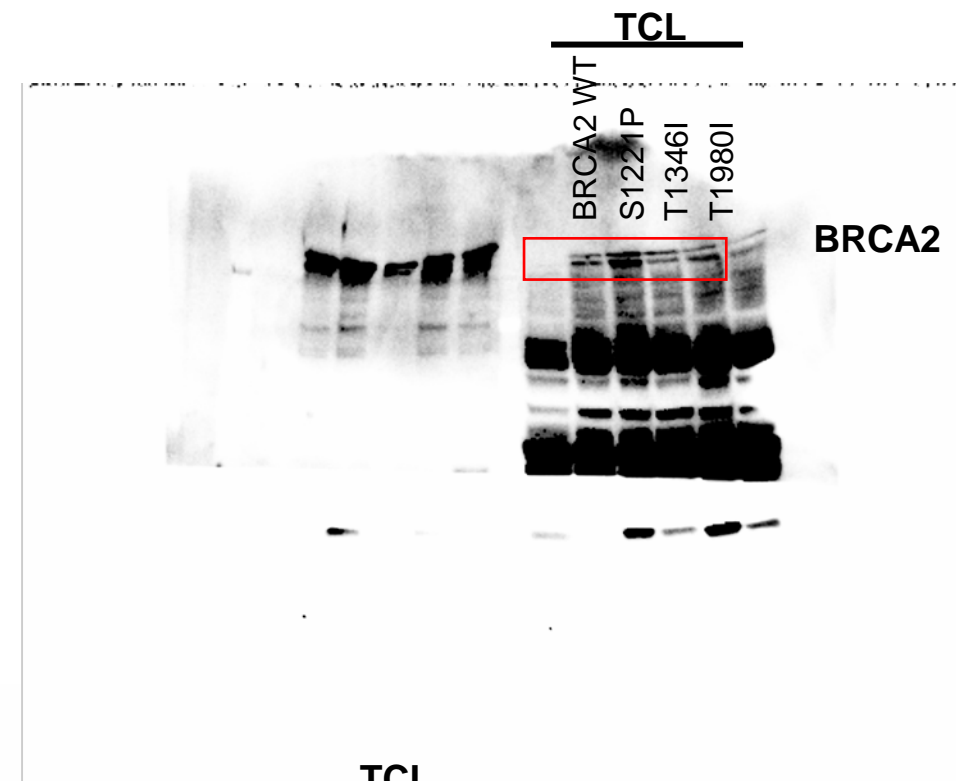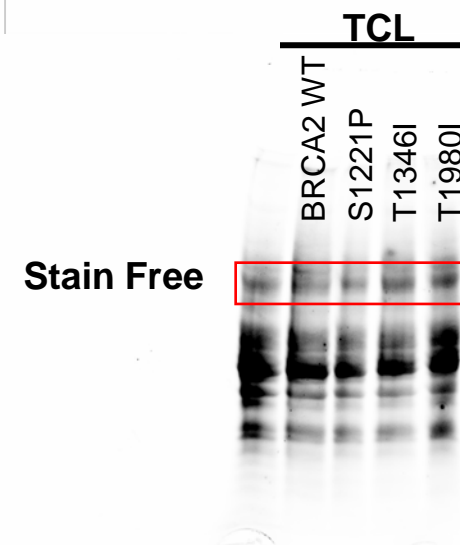

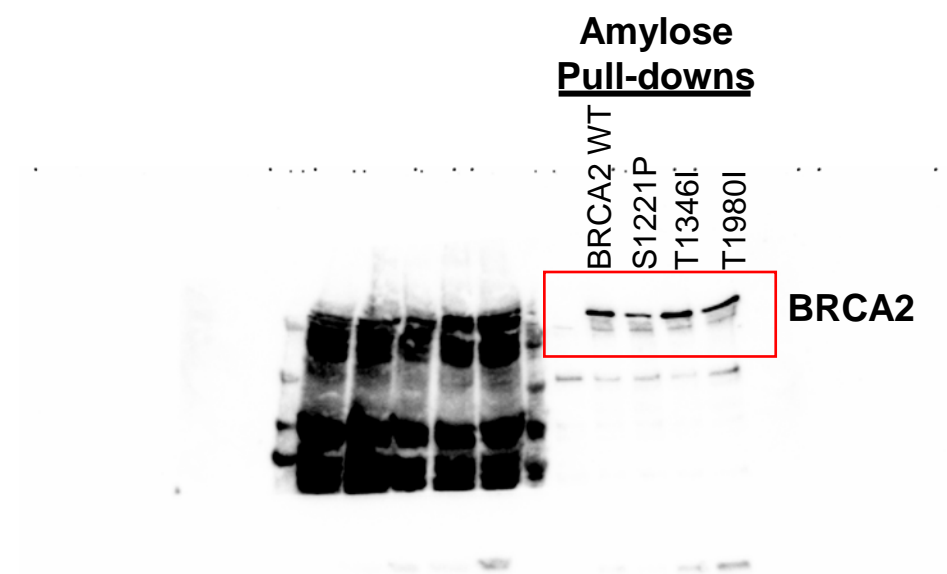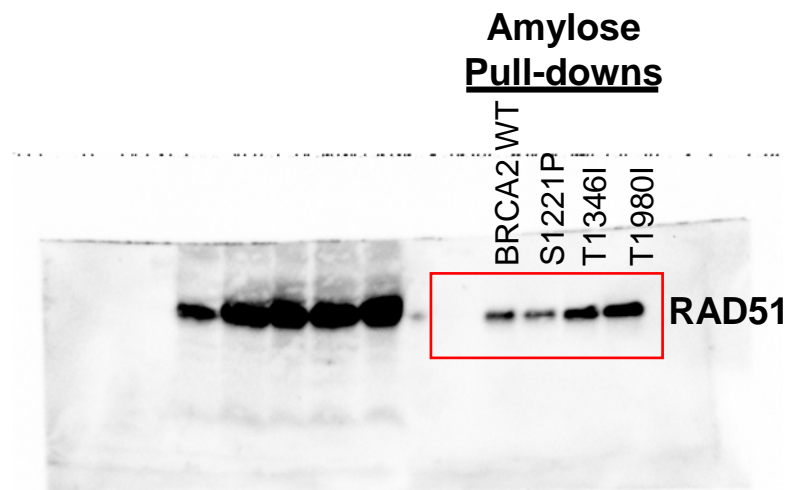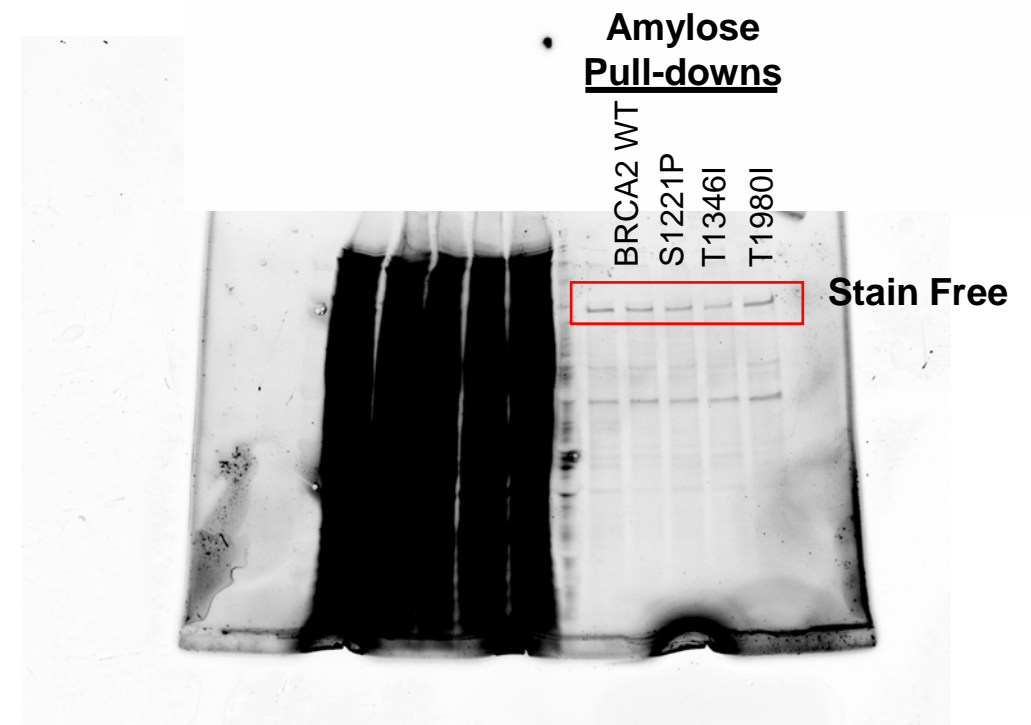

Supplement: fig4-figsupp1-data1 [file elife-79183-fig4-figsupp1-data1-v3.zip]

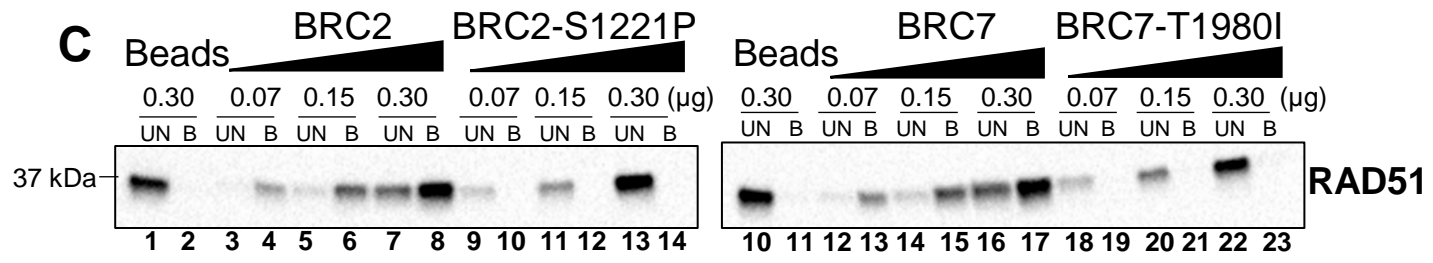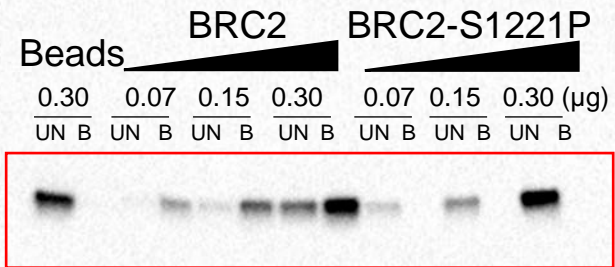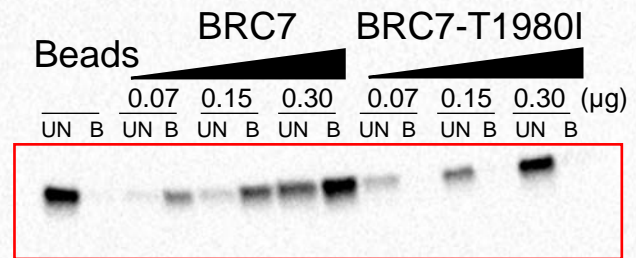

Supplement: fig4-figsupp2-data1 [file elife-79183-fig4-figsupp2-data1-v3.zip]

**E**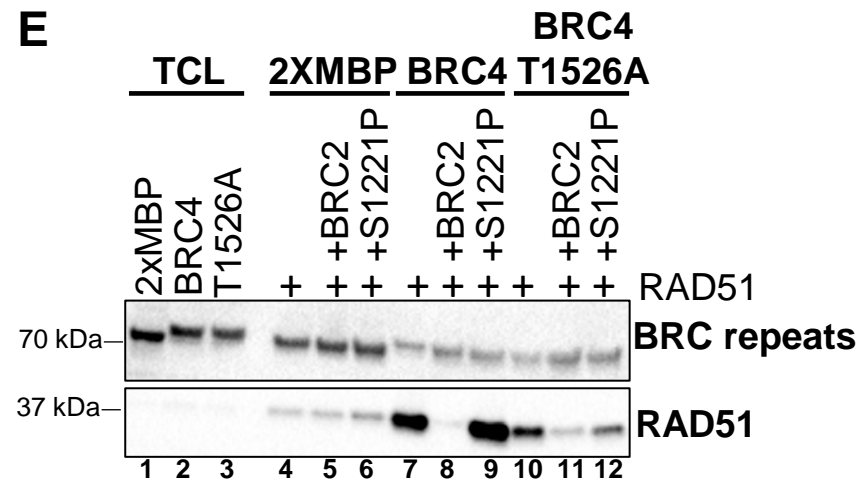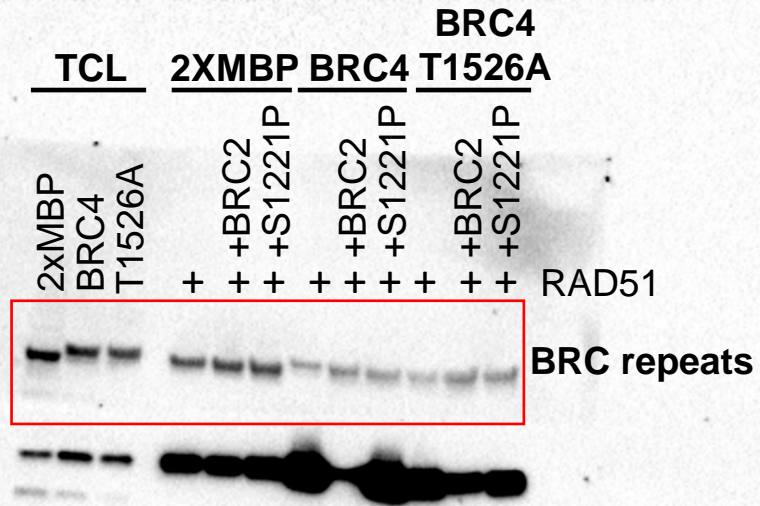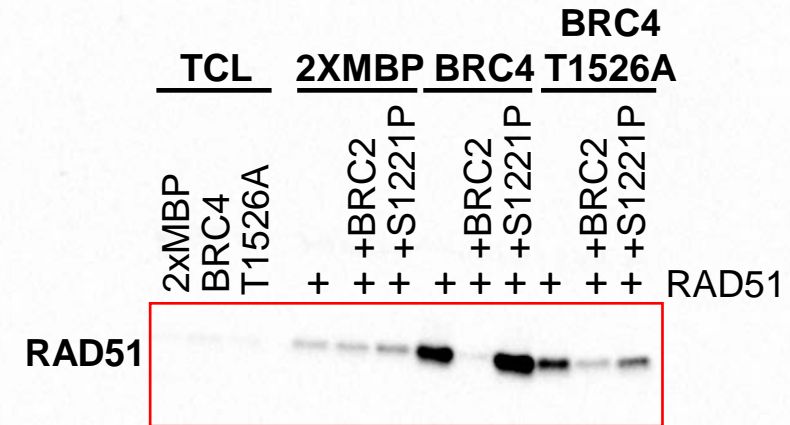

Supplement: fig4-figsupp2-data1 [file elife-79183-fig4-figsupp2-data1-v3.zip]

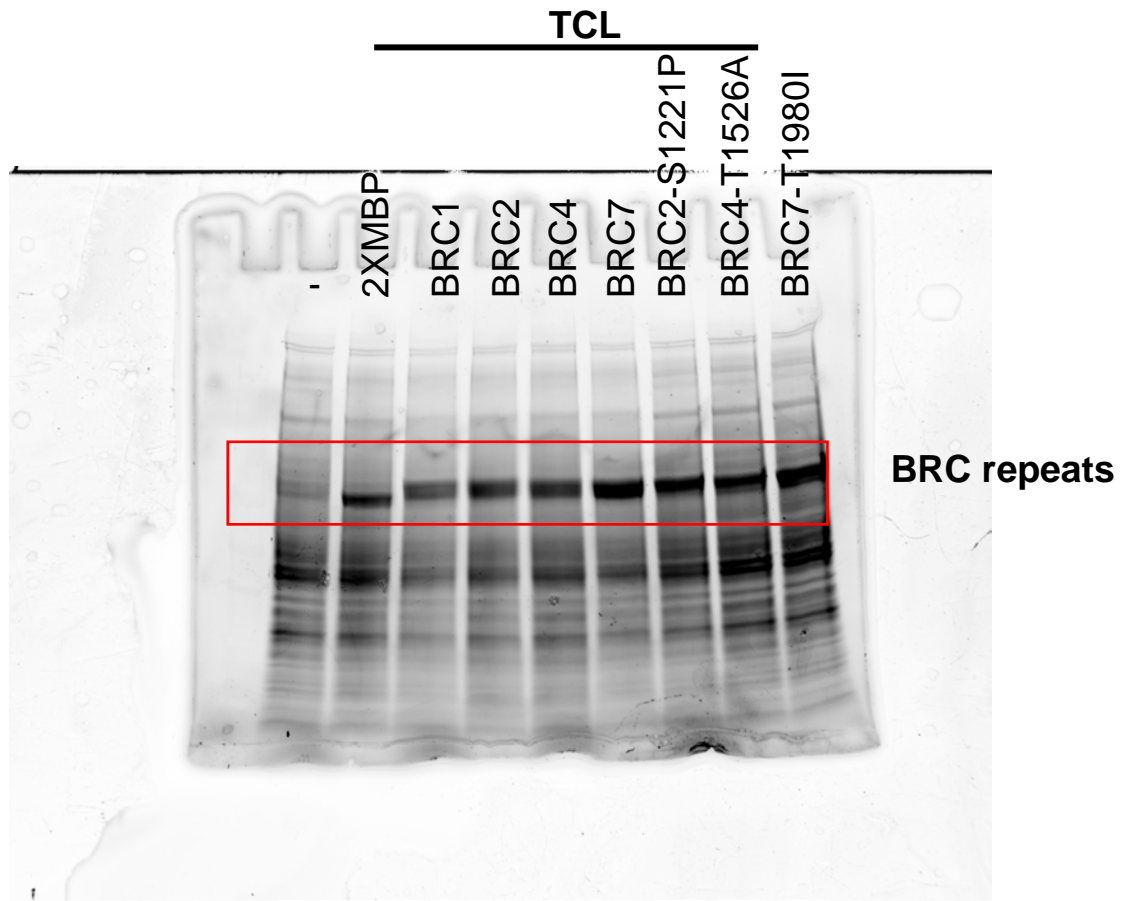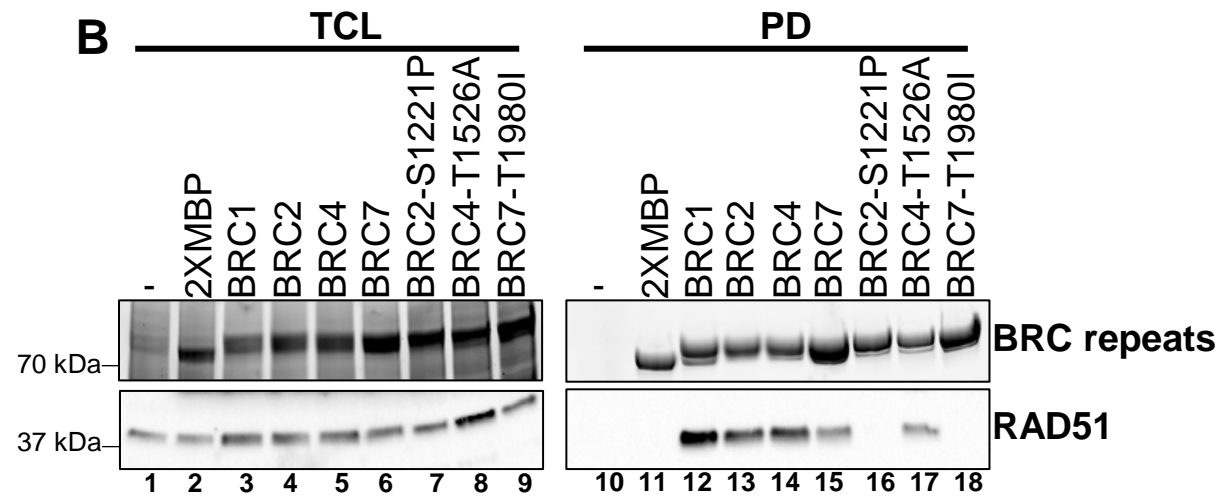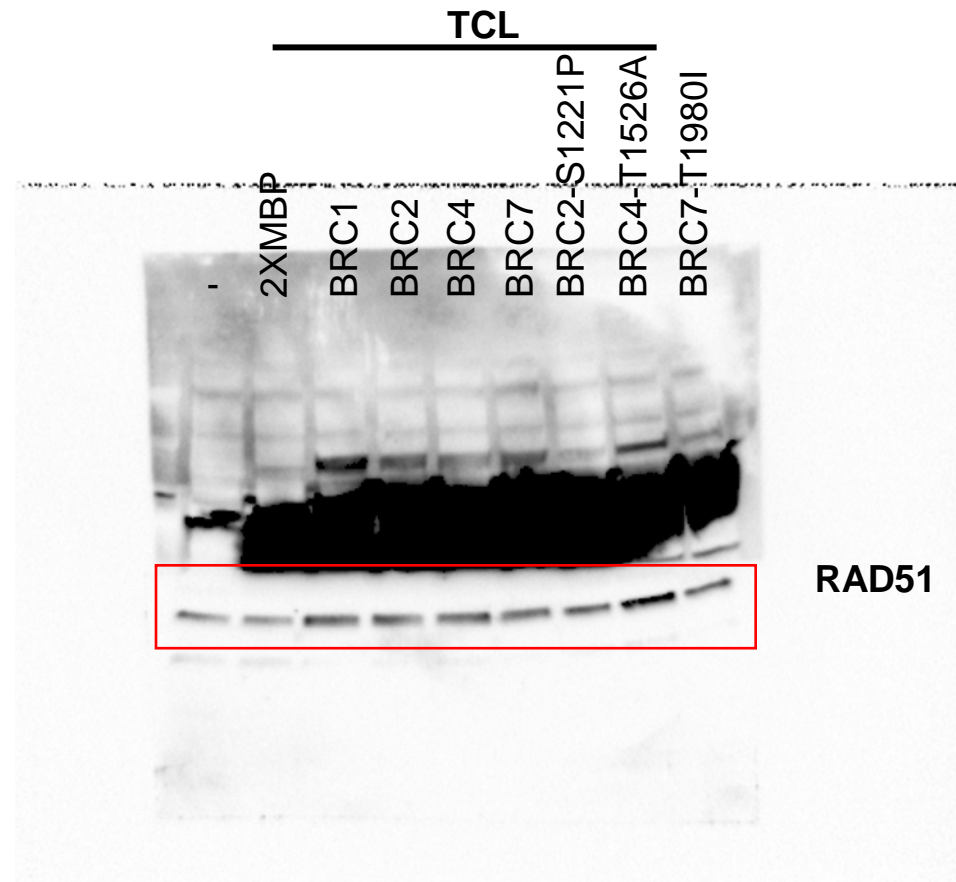

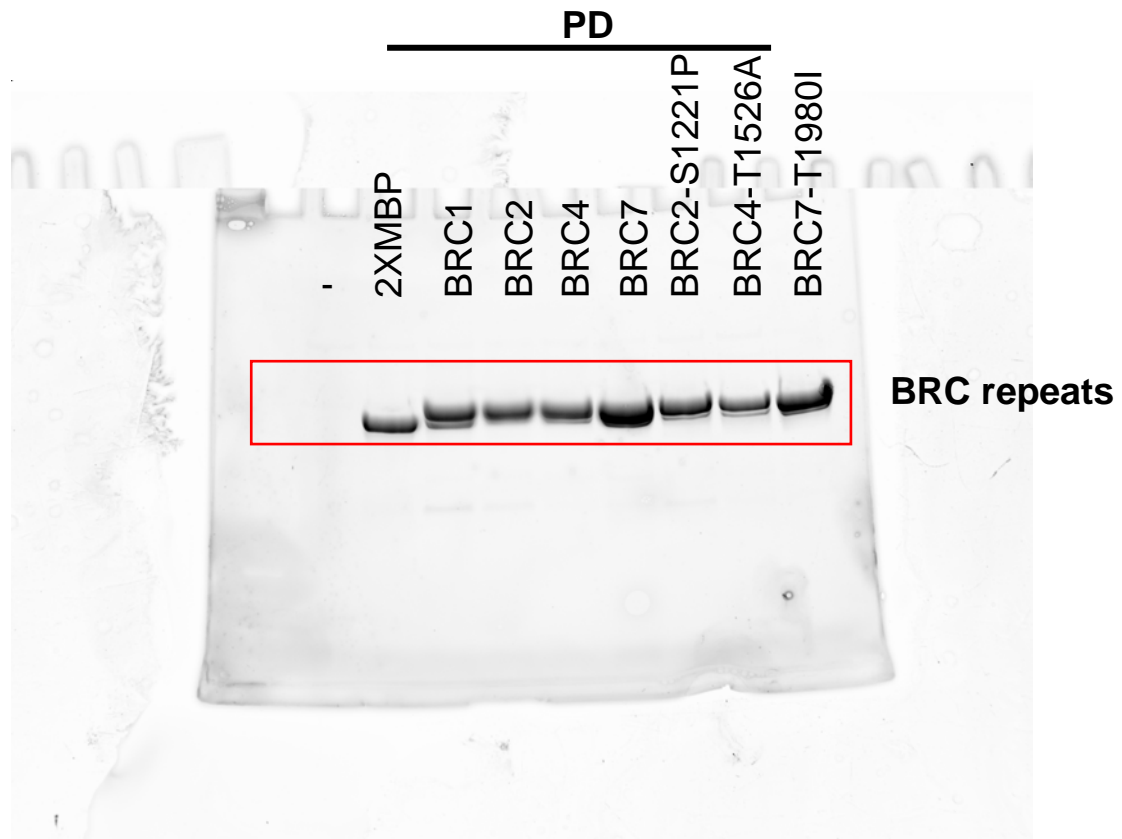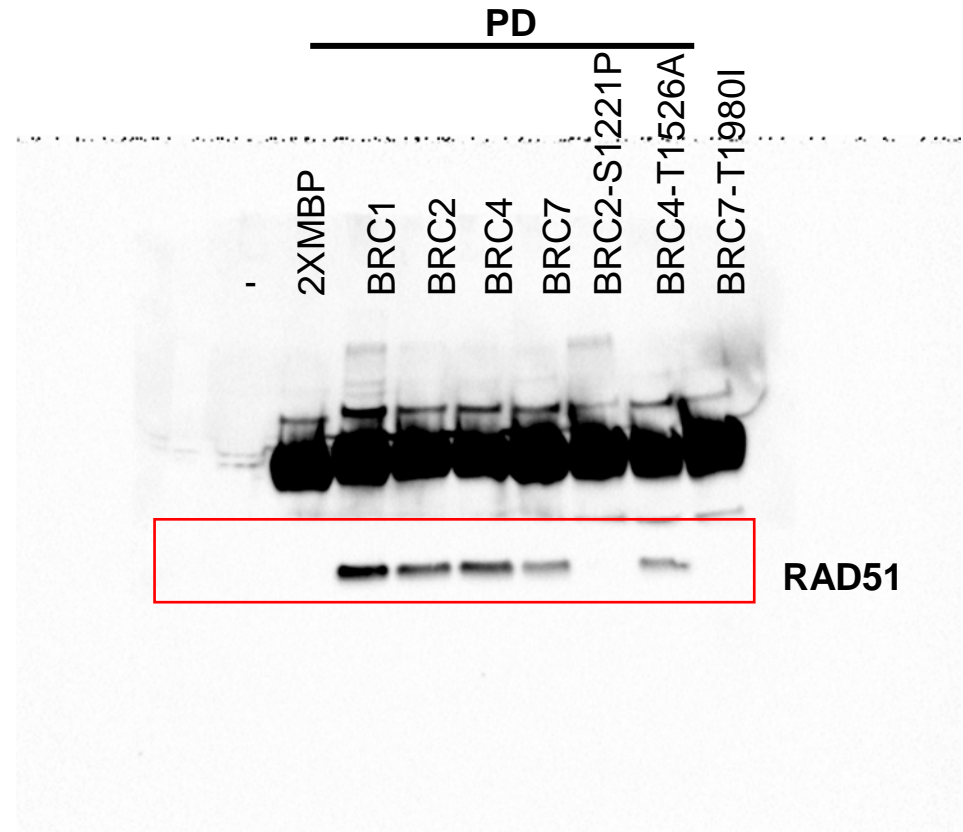

Supplement: fig4-figsupp2-data1 [file elife-79183-fig4-figsupp2-data1-v3.zip]

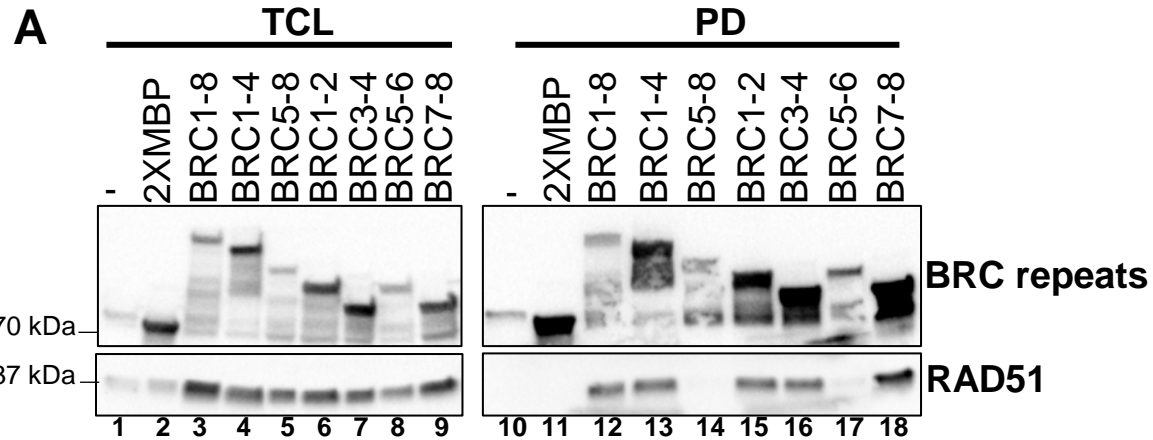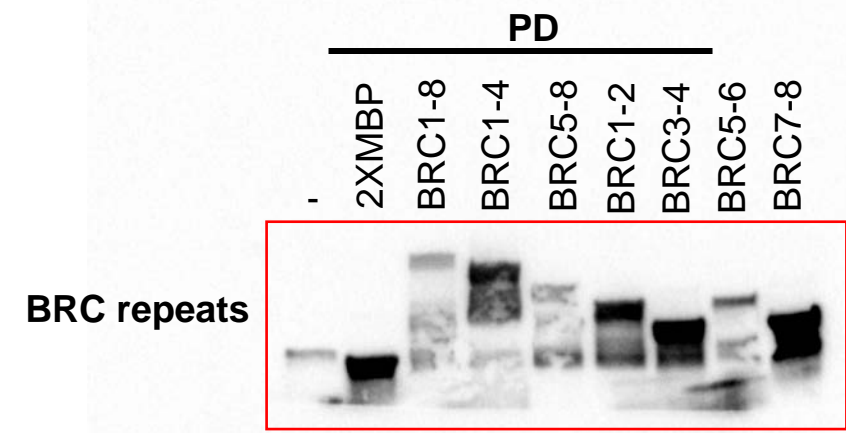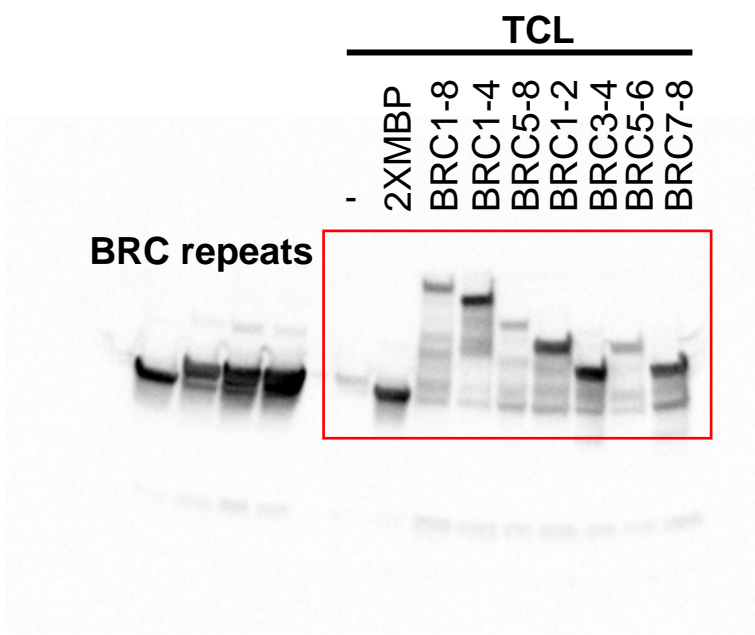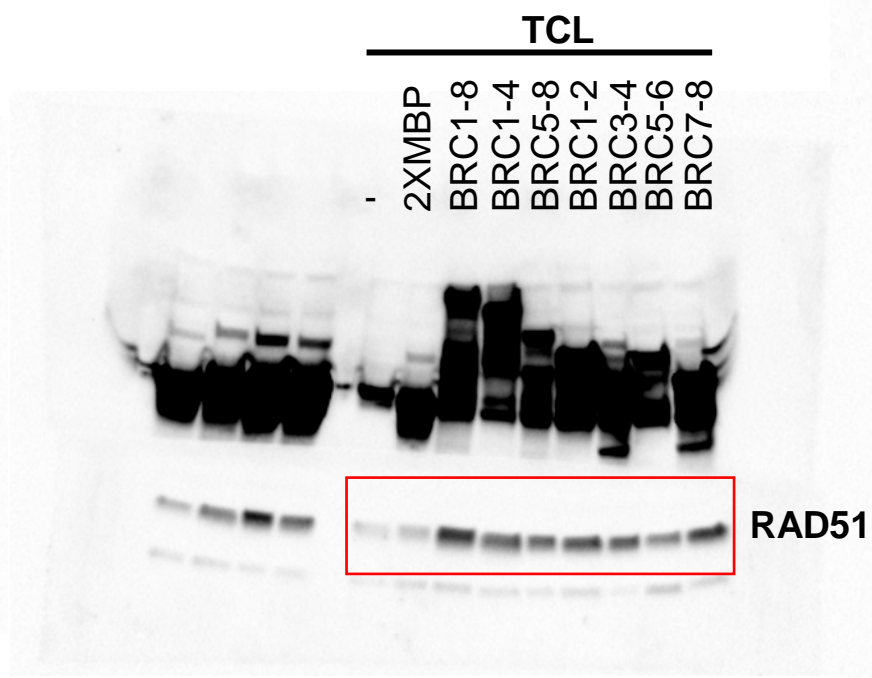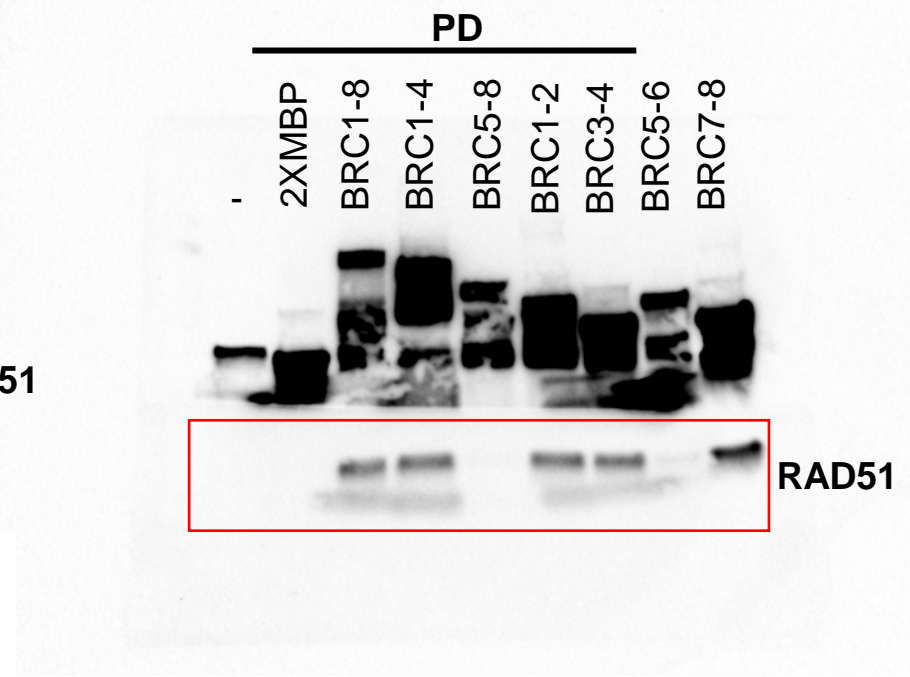

Supplement: fig4-figsupp2-data1 [file elife-79183-fig4-figsupp2-data1-v3.zip]

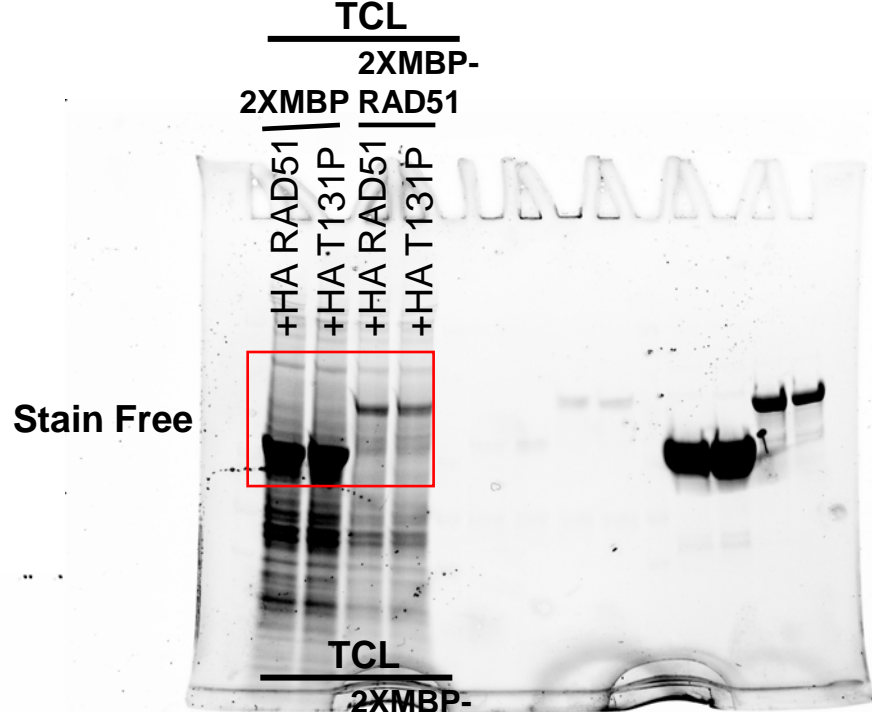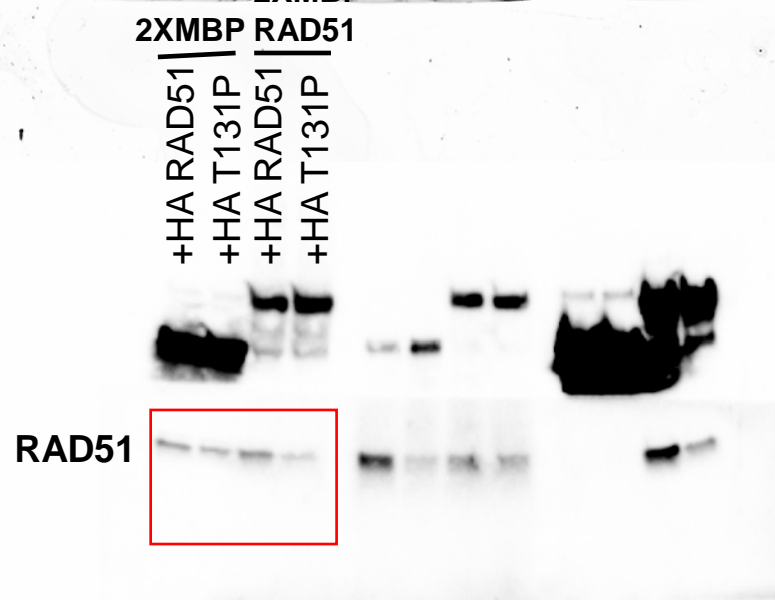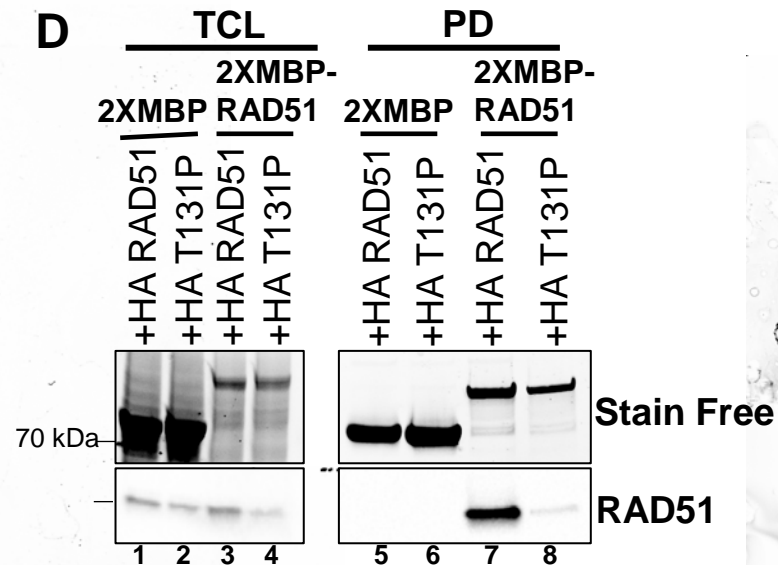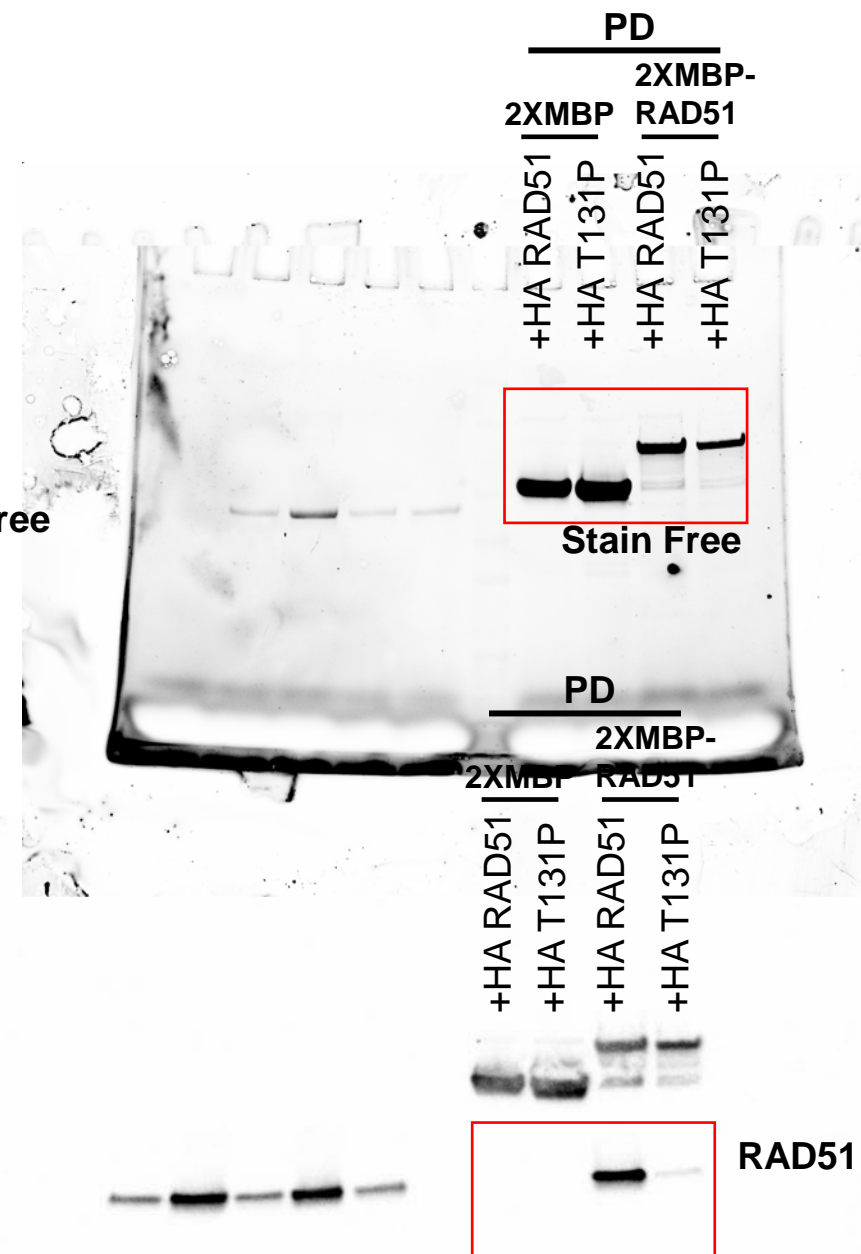

Supplement: fig4-figsupp2-data1 [file elife-79183-fig4-figsupp2-data1-v3.zip]

**B**

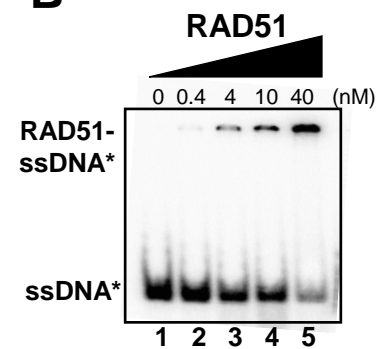

**RAD51**

0 0.4 4 10 40 (nM)

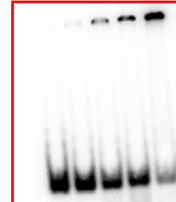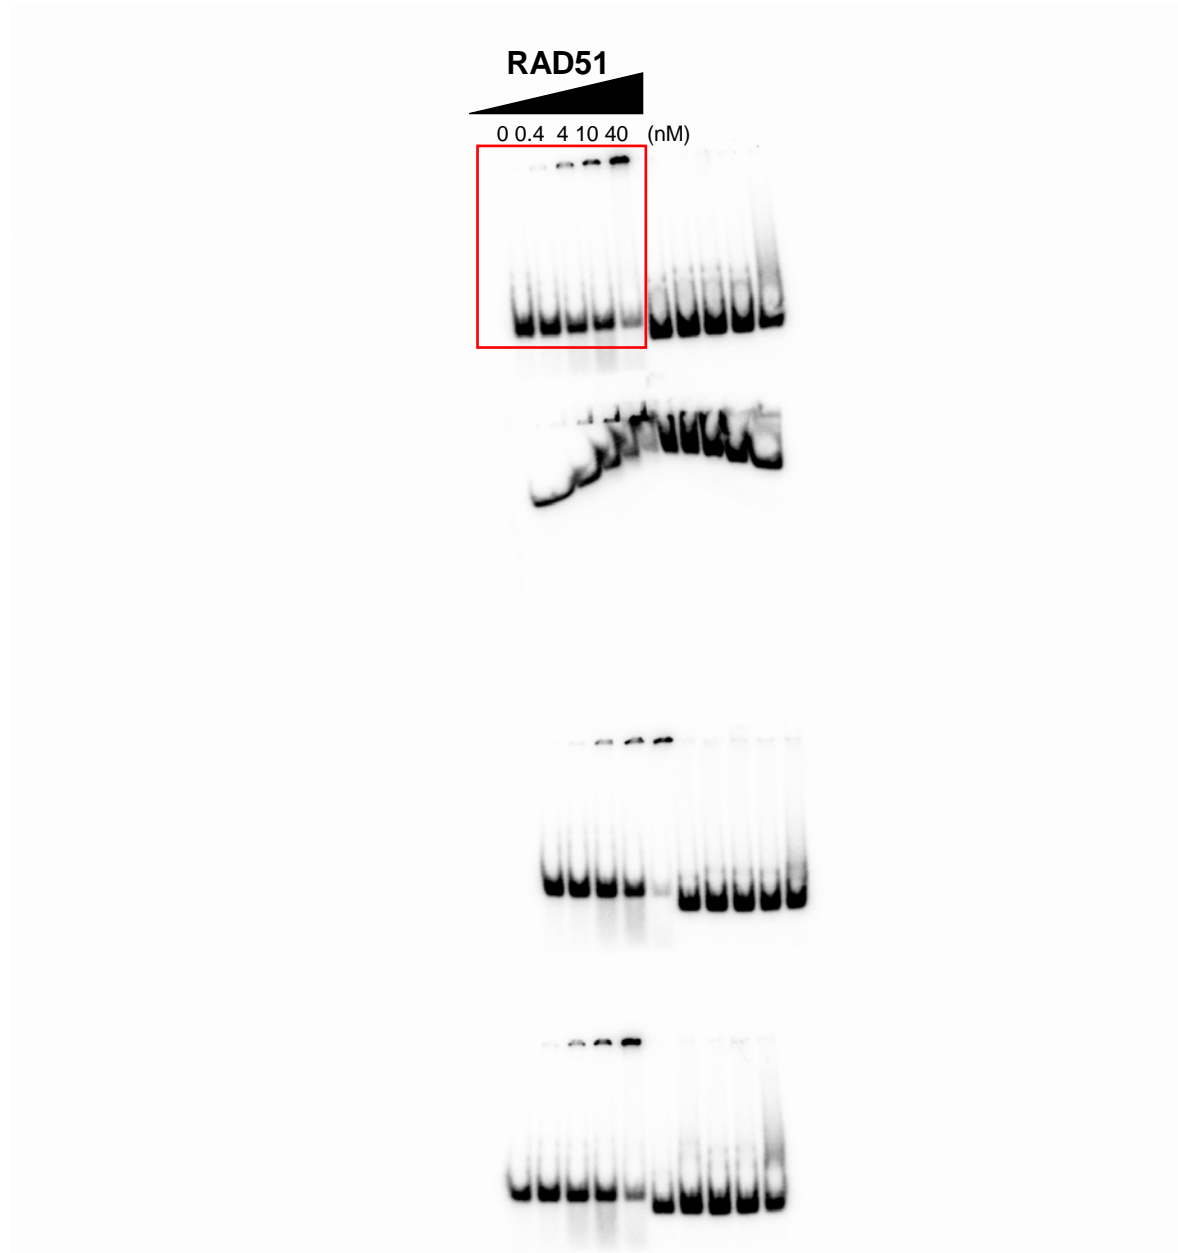

Supplement: fig5-figsupp1-data1 [file elife-79183-fig5-figsupp1-data1-v3.zip]

**A**

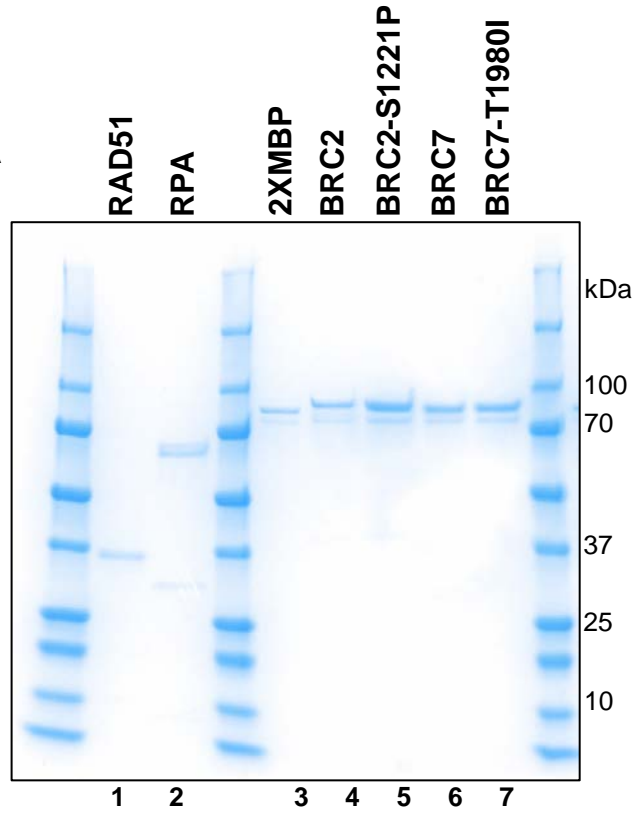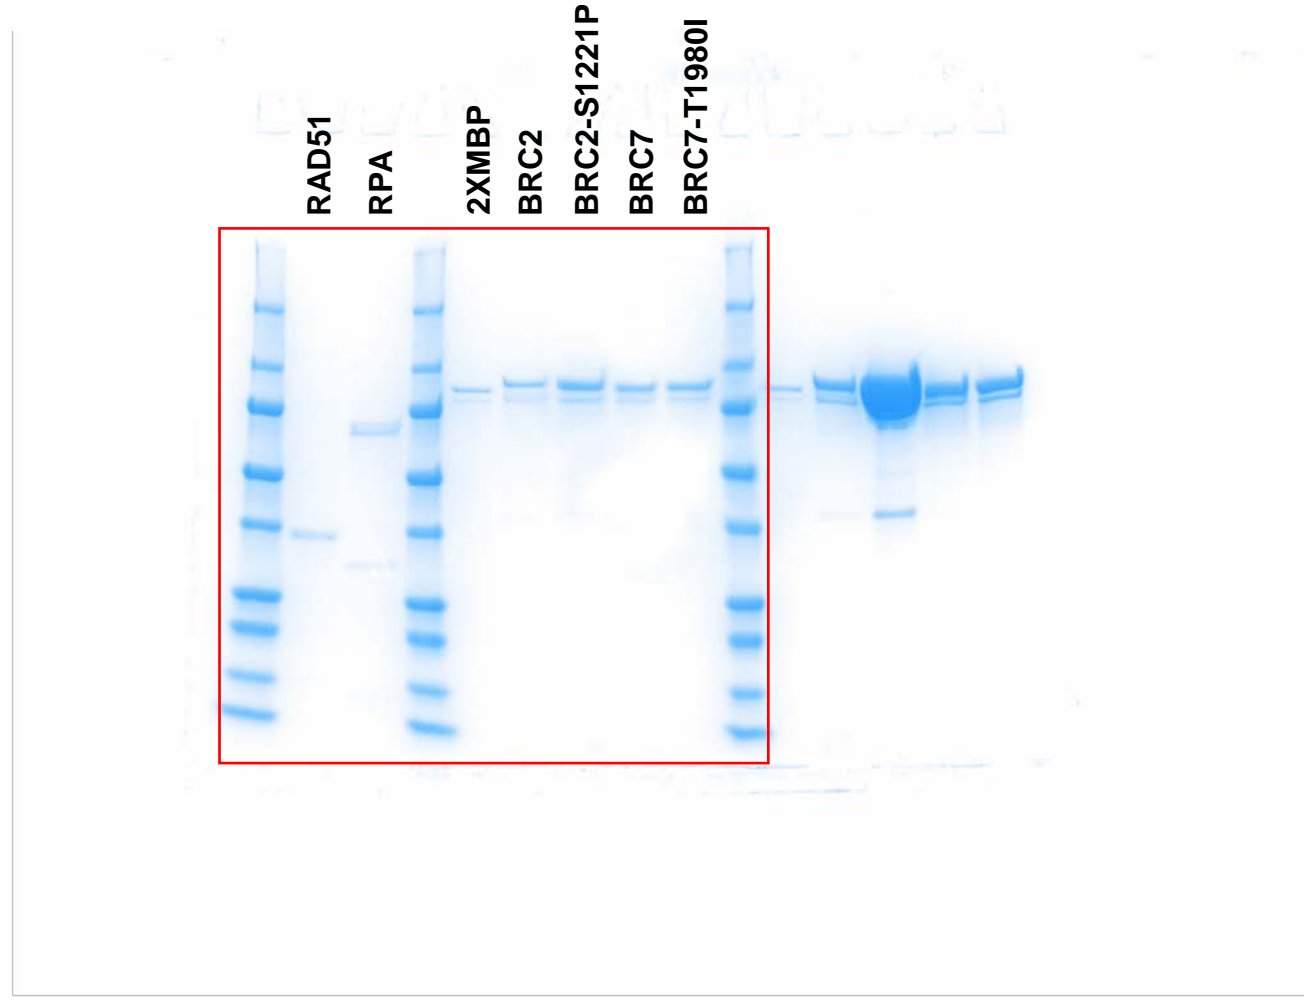

Supplement: fig5-figsupp1-data1 [file elife-79183-fig5-figsupp1-data1-v3.zip]

**B**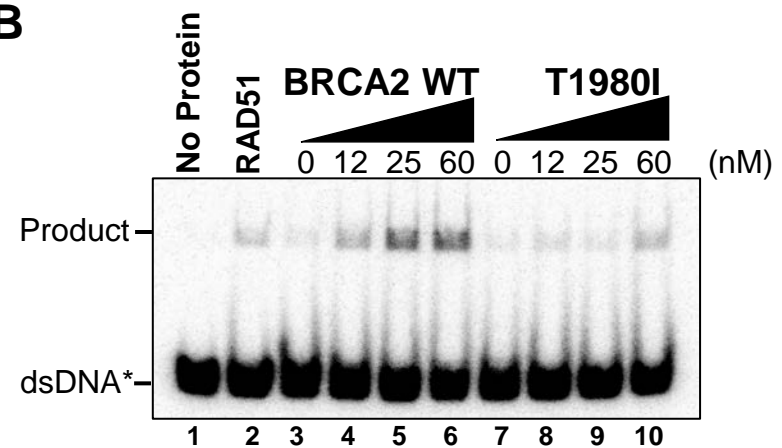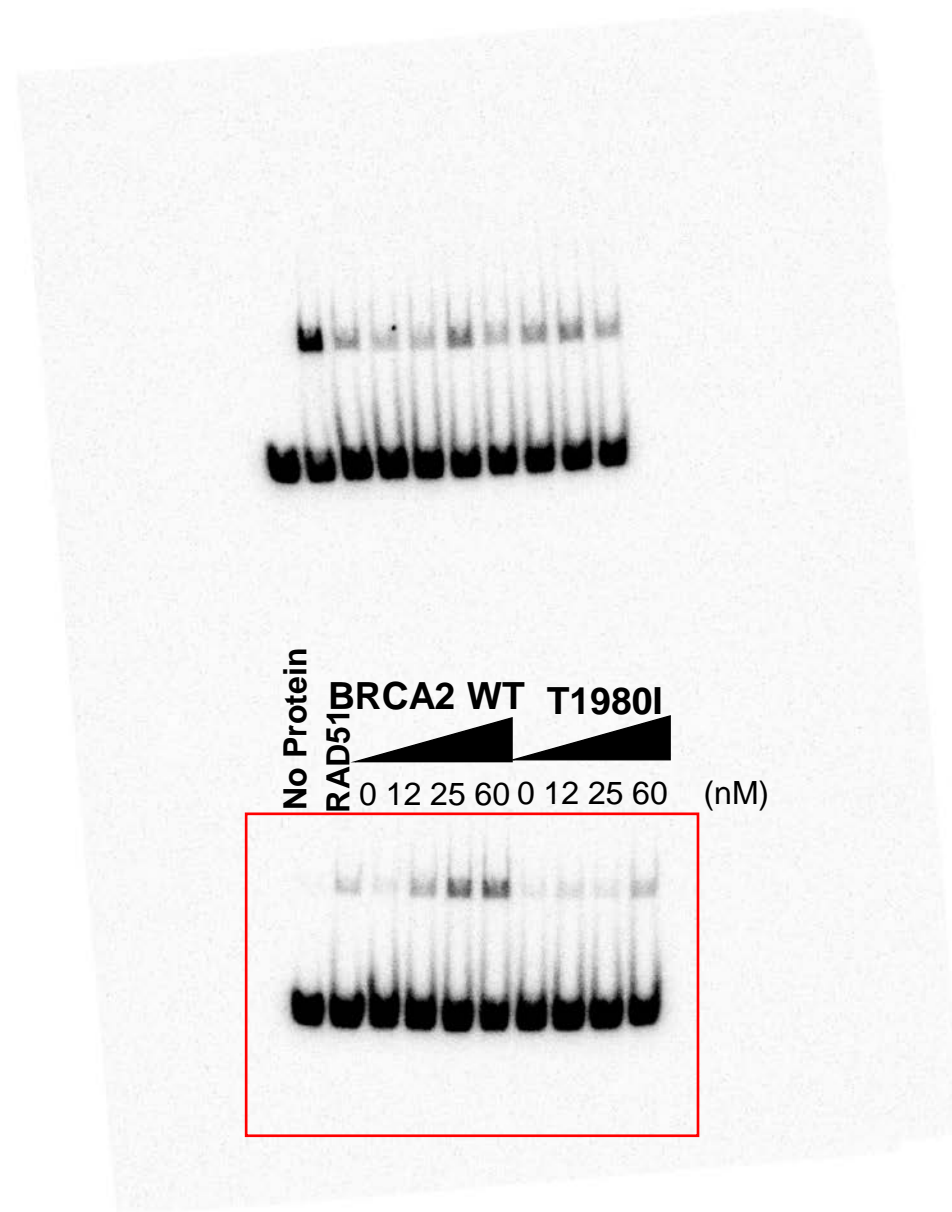

Supplement: fig6-data1 [file elife-79183-fig6-data1-v3.zip]

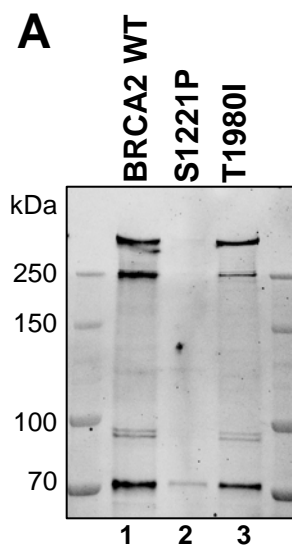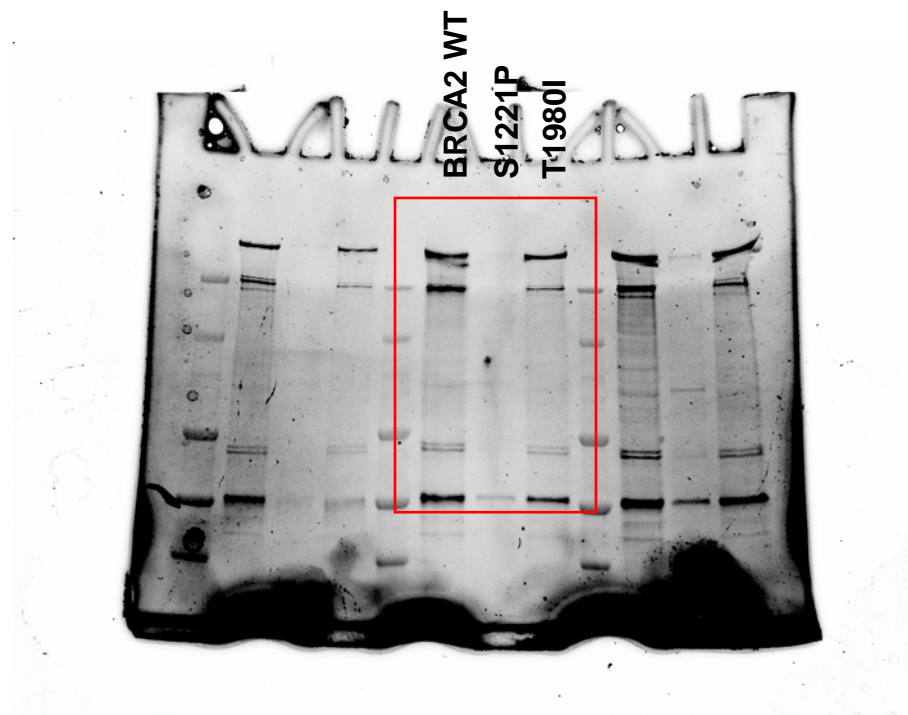

Supplement: fig6-figsupp1-data1 [file elife-79183-fig6-figsupp1-data1-v3.zip]
